# Supplementary material for: Associations between alcohol consumption and gray and white matter volumes in the UK Biobank
Source: PubMed Central journal article supplement (PMC8897479; doi:10.1038/s41467-022-28735-5), 2022-03-04

Supplementary Information (SI) for

**Associations Between Alcohol Consumption and Gray  
and White Matter Volumes in the UK Biobank**

**Table of Contents**

**Supplementary Tables**

**Supplementary Figures**

**Supplementary Table 1.** Regression Results: Volume of Gray Matter (whole brain, normalized)  
log intake is measured in standardized log(1 + daily units of alcohol).

| Standard Control Variables<br>N: 36,678 (df: 36,585), R <sup>2</sup> : 0.514                              |                                         |                      | Extended Control Variables<br>N: 36,678 (df: 36,578), R <sup>2</sup> : 0.520                              |                      |
|-----------------------------------------------------------------------------------------------------------|-----------------------------------------|----------------------|-----------------------------------------------------------------------------------------------------------|----------------------|
| Variable                                                                                                  | Regression Coefficient (SE), 95% CI     | t-stat (p-value)     | Regression Coefficient (SE), 95% CI                                                                       | t-stat (p-value)     |
| log intake                                                                                                | -0.1095 (0.0058), CI: [-0.1209,-0.0982] | -19.0 (p < 1.0e-16)  | -0.1125 (0.0057), CI: [-0.1238,-0.1013]                                                                   | -19.6 (p < 1.0e-16)  |
| log intake <sup>2</sup>                                                                                   | -0.0651 (0.0037), CI: [-0.0723,-0.0579] | -17.7 (p < 1.0e-16)  | -0.0596 (0.0037), CI: [-0.0668,-0.0524]                                                                   | -16.2 (p < 1.0e-16)  |
| log intake x male                                                                                         | 0.0174 (0.0080), CI: [0.0018,0.0330]    | 2.2 (p = 2.9e-02)    | 0.0224 (0.0079), CI: [0.0068,0.0379]                                                                      | 2.8 (p = 4.8e-03)    |
| log intake x std. age                                                                                     | 0.0080 (0.0037), CI: [0.0008,0.0152]    | 2.2 (p = 3.0e-02)    | 0.0080 (0.0037), CI: [0.0008,0.0151]                                                                      | 2.2 (p = 3.0e-02)    |
| standardized age                                                                                          | -0.5991 (0.0038), CI: [-0.6066,-0.5916] | -157.0 (p < 1.0e-16) | -0.5995 (0.0038), CI: [-0.6069,-0.5921]                                                                   | -158.0 (p < 1.0e-16) |
| standardized age <sup>2</sup>                                                                             | -0.0378 (0.0034), CI: [-0.0445,-0.0311] | -11.0 (p < 1.0e-16)  | -0.0403 (0.0034), CI: [-0.0469,-0.0336]                                                                   | -11.8 (p < 1.0e-16)  |
| Against model without log intake and interactions<br>Delta R <sup>2</sup> : 0.0099<br>F-test: p < 1.0e-16 |                                         |                      | Against model without log intake and interactions<br>Delta R <sup>2</sup> : 0.0099<br>F-test: p < 1.0e-16 |                      |
| Excluding Abstainers<br>N: 33,773 (df: 33,676), R <sup>2</sup> : 0.517                                    |                                         |                      | Excluding Those that Consume a High Level of Alcohol<br>N: 34,383 (df: 34,286), R <sup>2</sup> : 0.510    |                      |
| Variable                                                                                                  | Regression Coefficient (SE), 95% CI     | t-stat (p-value)     | Regression Coefficient (SE), 95% CI                                                                       | t-stat (p-value)     |
| log intake                                                                                                | -0.1025 (0.0064), CI: [-0.1151,-0.0899] | -15.9 (p < 1.0e-16)  | -0.0960 (0.0073), CI: [-0.1104,-0.0817]                                                                   | -13.1 (p < 1.0e-16)  |
| log intake <sup>2</sup>                                                                                   | -0.0701 (0.0045), CI: [-0.0790,-0.0611] | -15.4 (p < 1.0e-16)  | -0.0499 (0.0049), CI: [-0.0595,-0.0402]                                                                   | -10.1 (p < 1.0e-16)  |
| log intake x male                                                                                         | 0.0114 (0.0095), CI: [-0.0072,0.0299]   | 1.2 (p = 2.3e-01)    | 0.0214 (0.0088), CI: [0.0041,0.0387]                                                                      | 2.4 (p = 1.5e-02)    |
| log intake x std. age                                                                                     | 0.0127 (0.0043), CI: [0.0042,0.0212]    | 2.9 (p = 3.4e-03)    | 0.0100 (0.0040), CI: [0.0020,0.0179]                                                                      | 2.5 (p = 1.4e-02)    |
| standardized age                                                                                          | -0.6012 (0.0040), CI: [-0.6091,-0.5933] | -149.9 (p < 1.0e-16) | -0.5989 (0.0040), CI: [-0.6066,-0.5911]                                                                   | -151.2 (p < 1.0e-16) |
| standardized age <sup>2</sup>                                                                             | -0.0389 (0.0036), CI: [-0.0459,-0.0319] | -11.0 (p < 1.0e-16)  | -0.0388 (0.0035), CI: [-0.0457,-0.0319]                                                                   | -11.0 (p < 1.0e-16)  |
| Against model without log intake and interactions<br>Delta R <sup>2</sup> : 0.0108<br>F-test: p < 1.0e-16 |                                         |                      | Against model without log intake and interactions<br>Delta R <sup>2</sup> : 0.0038<br>F-test: p < 1.0e-16 |                      |

**Supplementary Table 2.** Regression Results: Volume of White Matter (whole brain, normalized)  
log intake is measured in standardized log(1 + daily units of alcohol).

| Standard Control Variables                        |                                         |                     | Extended Control Variables                           |                     |
|---------------------------------------------------|-----------------------------------------|---------------------|------------------------------------------------------|---------------------|
| N: 36,678 (df: 36,585), R <sup>2</sup> : 0.122    |                                         |                     | N: 36,678 (df: 36,578), R <sup>2</sup> : 0.123       |                     |
| Variable                                          | Regression Coefficient (SE), 95% CI     | t-stat (p-value)    | Regression Coefficient (SE), 95% CI                  | t-stat (p-value)    |
| log intake                                        | -0.0650 (0.0078), CI: [-0.0802,-0.0498] | -8.4 (p < 1.0e-16)  | -0.0632 (0.0078), CI: [-0.0784,-0.0479]              | -8.1 (p = 4.3e-16)  |
| log intake <sup>2</sup>                           | -0.0370 (0.0050), CI: [-0.0468,-0.0273] | -7.5 (p = 7.8e-14)  | -0.0378 (0.0050), CI: [-0.0475,-0.0280]              | -7.6 (p = 2.9e-14)  |
| log intake x male                                 | 0.0164 (0.0107), CI: [-0.0046,0.0374]   | 1.5 (p = 1.2e-01)   | 0.0148 (0.0107), CI: [-0.0062,0.0358]                | 1.4 (p = 1.7e-01)   |
| log intake x std. age                             | 0.0111 (0.0050), CI: [0.0014,0.0208]    | 2.2 (p = 2.5e-02)   | 0.0110 (0.0050), CI: [0.0013,0.0207]                 | 2.2 (p = 2.6e-02)   |
| standardized age                                  | -0.3213 (0.0051), CI: [-0.3313,-0.3112] | -62.6 (p < 1.0e-16) | -0.3218 (0.0051), CI: [-0.3319,-0.3118]              | -62.7 (p < 1.0e-16) |
| standardized age <sup>2</sup>                     | -0.0127 (0.0046), CI: [-0.0217,-0.0037] | -2.8 (p = 5.7e-03)  | -0.0126 (0.0046), CI: [-0.0216,-0.0036]              | -2.7 (p = 6.2e-03)  |
| Against model without log intake and interactions |                                         |                     | Against model without log intake and interactions    |                     |
| Delta R <sup>2</sup> : 0.0033                     |                                         |                     | Delta R <sup>2</sup> : 0.0032                        |                     |
| F-test: p < 1.0e-16                               |                                         |                     | F-test: p < 1.0e-16                                  |                     |
| Excluding Abstainers                              |                                         |                     | Excluding Those that Consume a High Level of Alcohol |                     |
| N: 33,773 (df: 33,676), R <sup>2</sup> : 0.124    |                                         |                     | N: 34,383 (df: 34,286), R <sup>2</sup> : 0.124       |                     |
| Variable                                          | Regression Coefficient (SE), 95% CI     | t-stat (p-value)    | Regression Coefficient (SE), 95% CI                  | t-stat (p-value)    |
| log intake                                        | -0.0599 (0.0087), CI: [-0.0769,-0.0429] | -6.9 (p = 4.6e-12)  | -0.0596 (0.0098), CI: [-0.0789,-0.0403]              | -6.1 (p = 1.4e-09)  |
| log intake <sup>2</sup>                           | -0.0369 (0.0061), CI: [-0.0489,-0.0249] | -6.0 (p = 1.7e-09)  | -0.0327 (0.0066), CI: [-0.0456,-0.0197]              | -4.9 (p = 7.9e-07)  |
| log intake x male                                 | 0.0073 (0.0127), CI: [-0.0176,0.0323]   | 0.6 (p = 5.7e-01)   | 0.0148 (0.0119), CI: [-0.0084,0.0381]                | 1.3 (p = 2.1e-01)   |
| log intake x std. age                             | 0.0187 (0.0059), CI: [0.0072,0.0301]    | 3.2 (p = 1.4e-03)   | 0.0088 (0.0054), CI: [-0.0019,0.0194]                | 1.6 (p = 1.1e-01)   |
| standardized age                                  | -0.3251 (0.0054), CI: [-0.3357,-0.3146] | -60.2 (p < 1.0e-16) | -0.3223 (0.0053), CI: [-0.3327,-0.3119]              | -60.6 (p < 1.0e-16) |
| standardized age <sup>2</sup>                     | -0.0133 (0.0048), CI: [-0.0227,-0.0040] | -2.8 (p = 5.3e-03)  | -0.0135 (0.0047), CI: [-0.0228,-0.0043]              | -2.9 (p = 4.2e-03)  |
| Against model without log intake and interactions |                                         |                     | Against model without log intake and interactions    |                     |
| Delta R <sup>2</sup> : 0.0036                     |                                         |                     | Delta R <sup>2</sup> : 0.0014                        |                     |
| F-test: p < 1.0e-16                               |                                         |                     | F-test: p = 5.0e-13                                  |                     |

**Supplementary Figure 1.** Bar plots representing the average residual volume of whole-brain gray and white matter gray and white matter volume for individuals grouped by the number of daily alcohol units after excluding heavy drinkers and controlling for standard control variables. The mean residuals are in terms of standard deviations of the dependent variable, where zero represents the average residual in the sample. The error bars represent the 95% confidence interval. \* $p < 0.01$  and \*\* $p < .0001$  for groups showing a significant difference in pairwise two-tailed t-test (uncorrected) against the group consuming up to one alcohol unit daily. F = females, M = males.

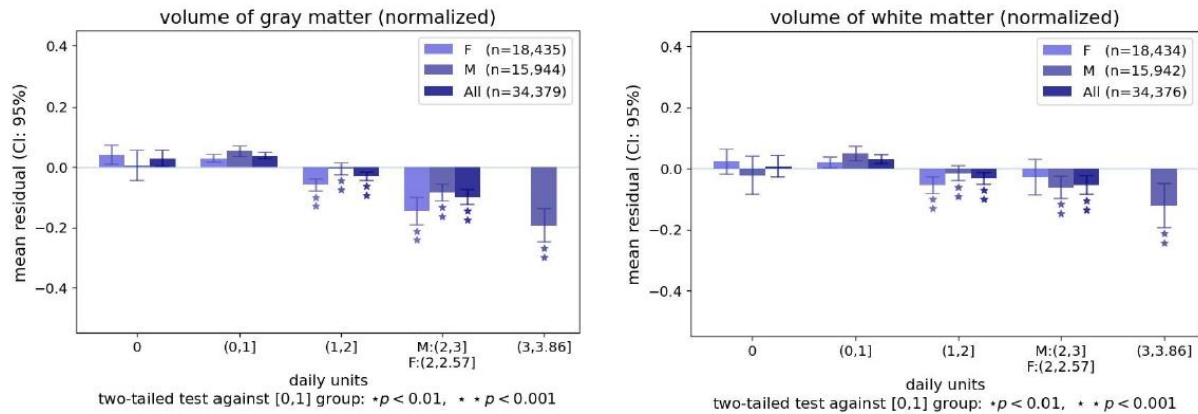

**Supplementary Figure 2.** Associations between alcohol intake and regional gray matter volume imaging-derived phenotypes predicted from the regression model with standard controls, arranged into brain lobes along the x-axis. For these variables, the significance of the correlation is plotted vertically in units of  $-\log_{10}(\text{p-value})$ . The dotted horizontal line indicates the threshold corresponding to multiple correction using the Holm method ( $1.64 \times 10^{-4}$ ).

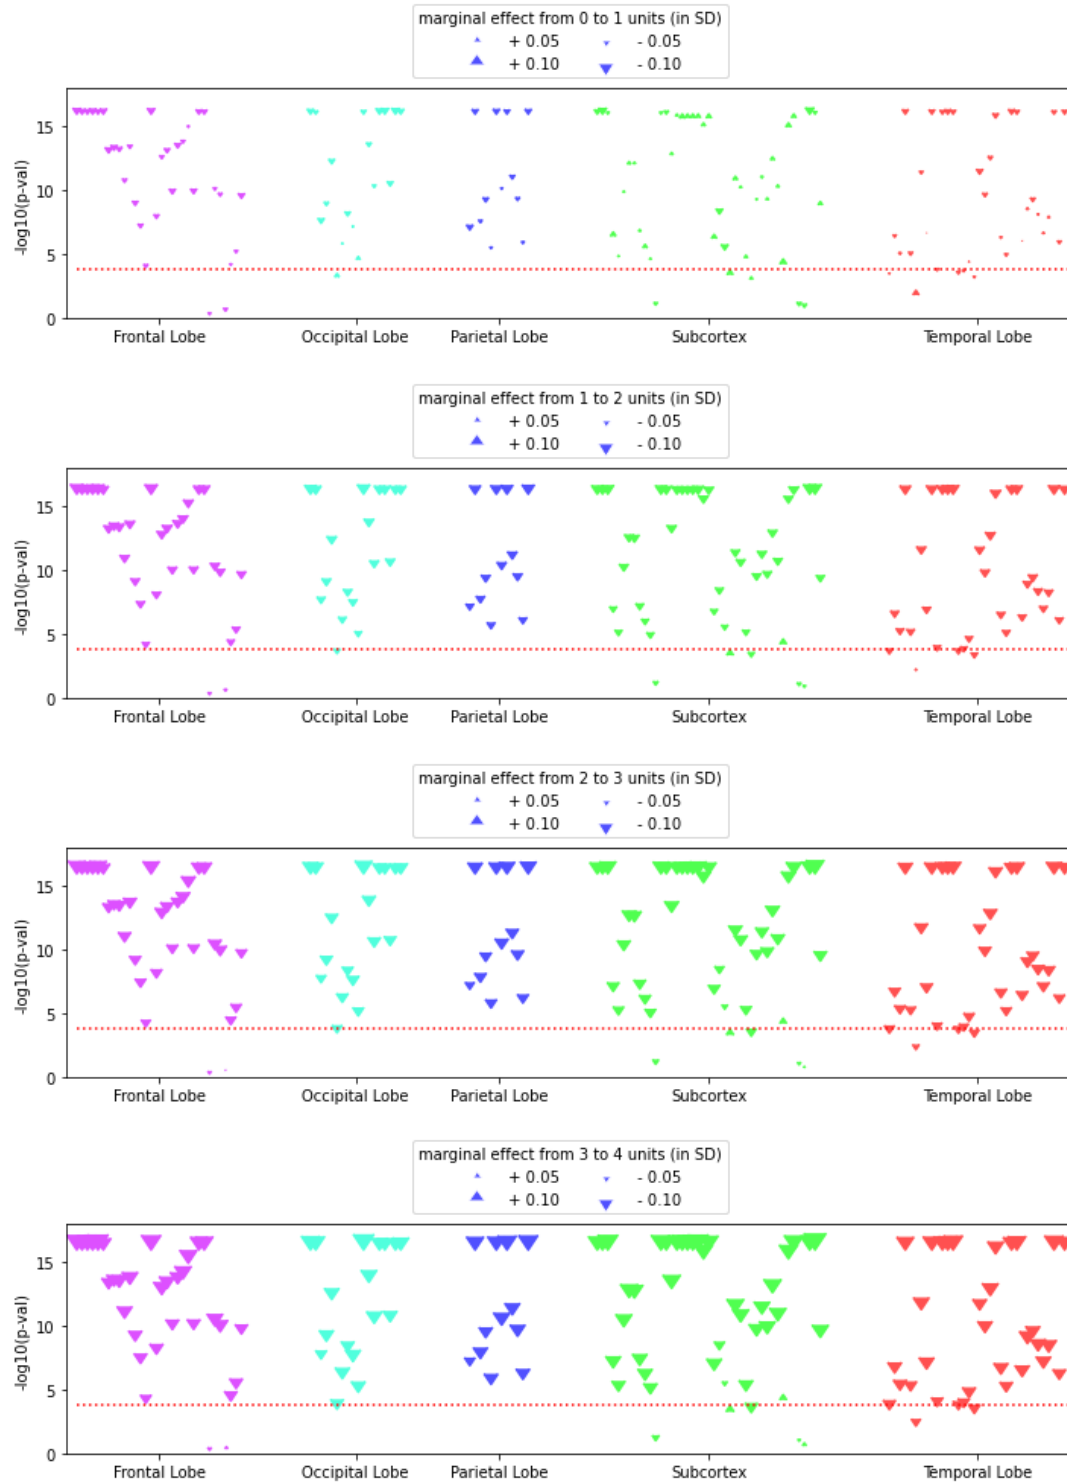

**Supplementary Figure 3.** Bar plots representing the average residual volume of localized gray matter volume imaging-derived phenotypes for individuals grouped by the number of daily alcohol units after excluding heavy drinkers and controlling for standard control variables. The mean residuals are in terms of standard deviations of the dependent variable, where zero represents the average residual in the sample. The error bars represent the 95% confidence interval. \* $p < 0.01$  and \*\* $p < .0001$  for groups showing a significant difference in pairwise two-tailed t-test (uncorrected) against the group consuming up to one alcohol unit daily. F = females, M = males, l = left, r = right.

# volume of thalamus (l)

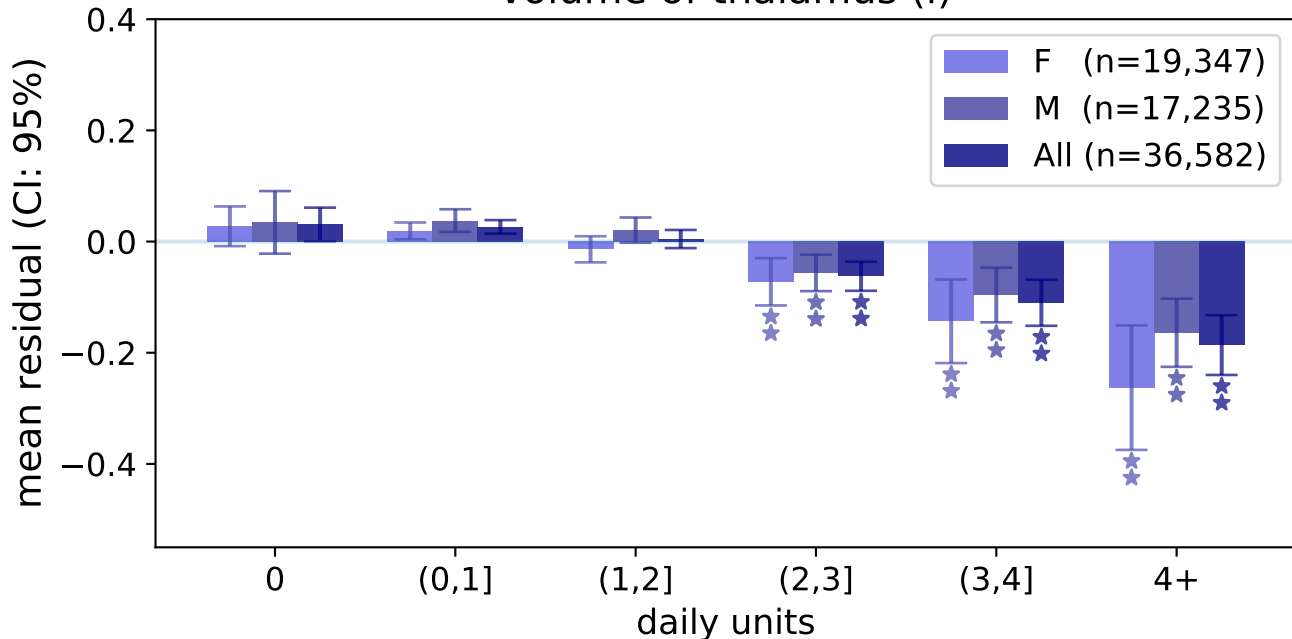

two-tailed test against [0,1] group: \*  $p < 0.01$ , \* \*  $p < 0.001$

# volume of thalamus (r)

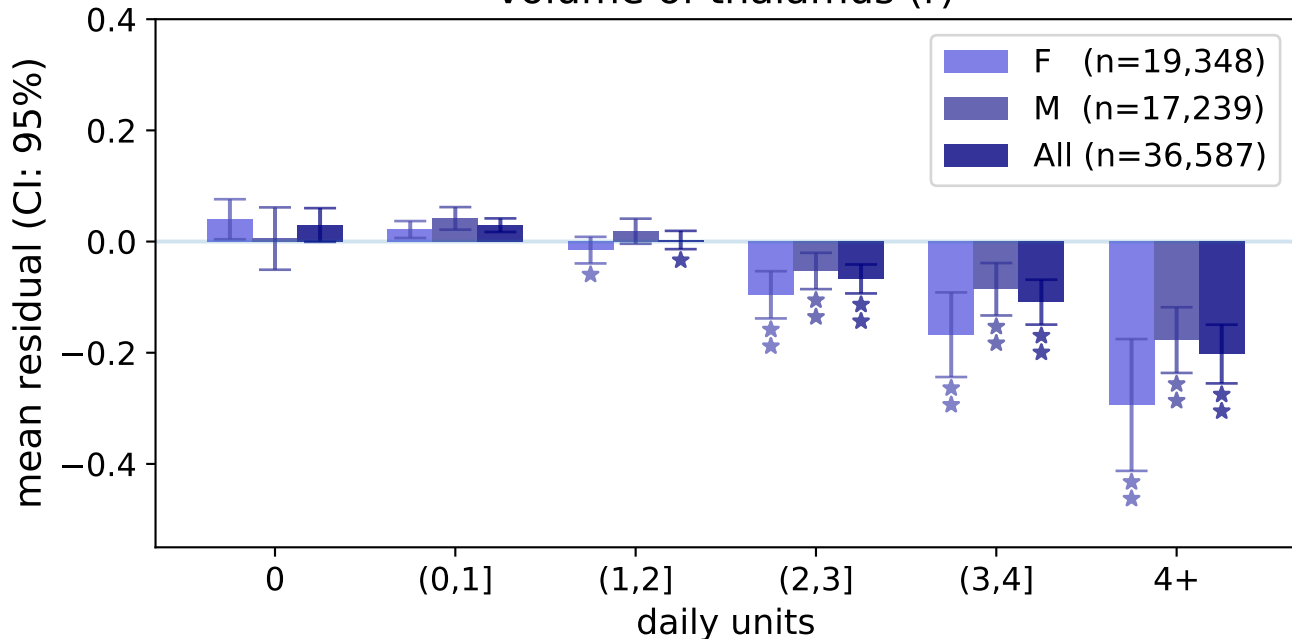

two-tailed test against [0,1] group: \*  $p < 0.01$ , \* \*  $p < 0.001$

## volume of caudate (l)

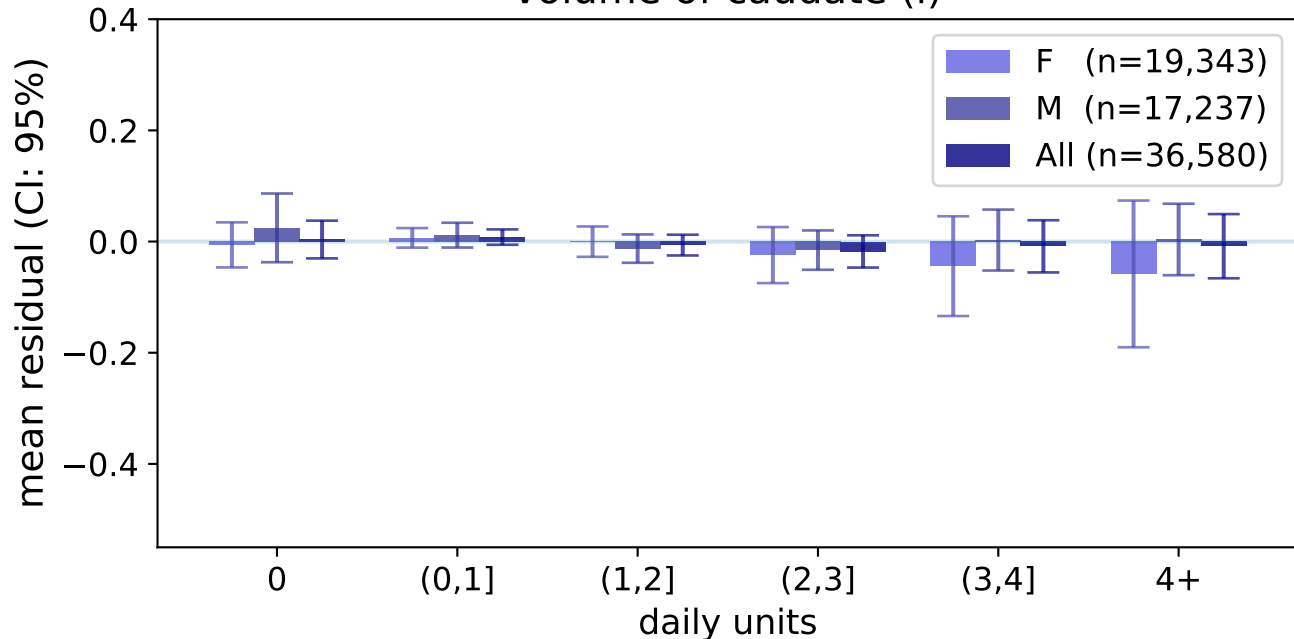

two-tailed test against [0,1] group: \*  $p < 0.01$ , \* \*  $p < 0.001$

## volume of caudate (r)

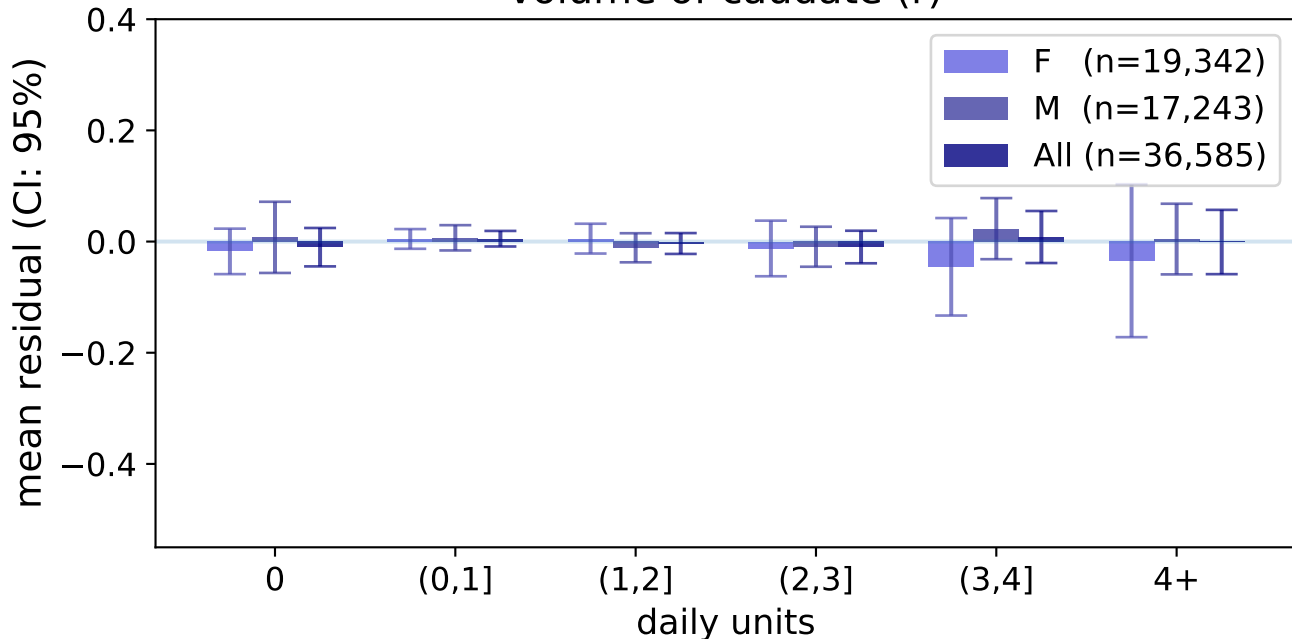

two-tailed test against [0,1] group: \*  $p < 0.01$ , \* \*  $p < 0.001$

# volume of putamen (l)

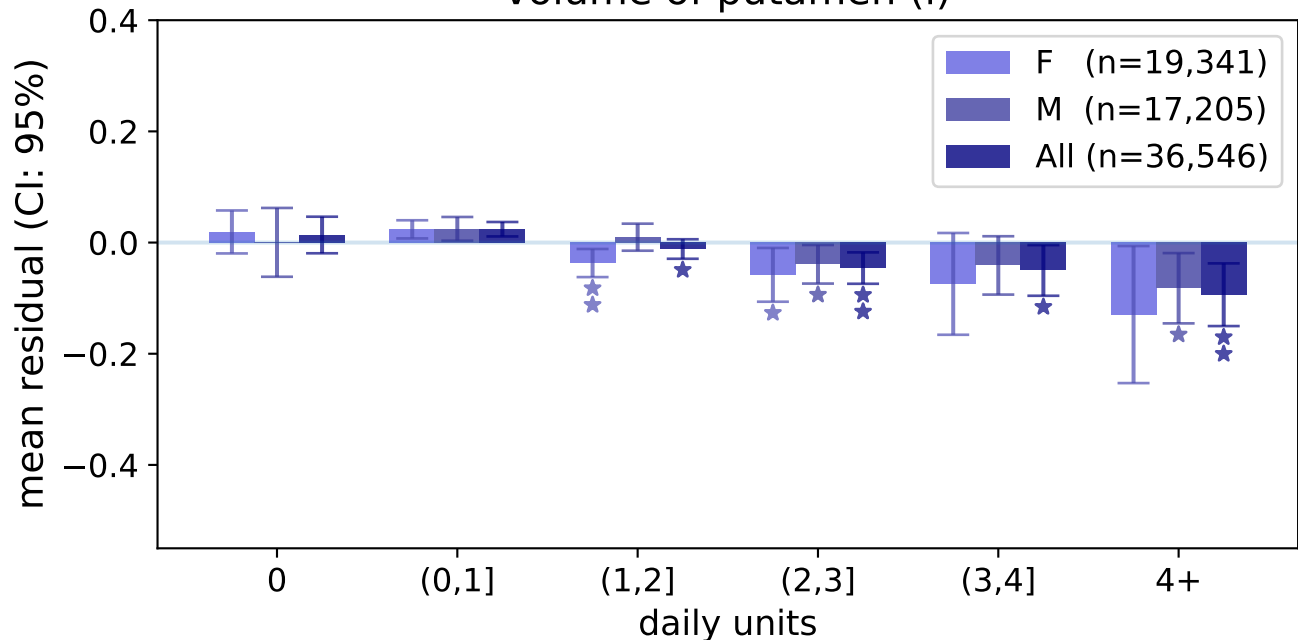

two-tailed test against [0,1] group: \*  $p < 0.01$ , \*\*  $p < 0.001$

# volume of putamen (r)

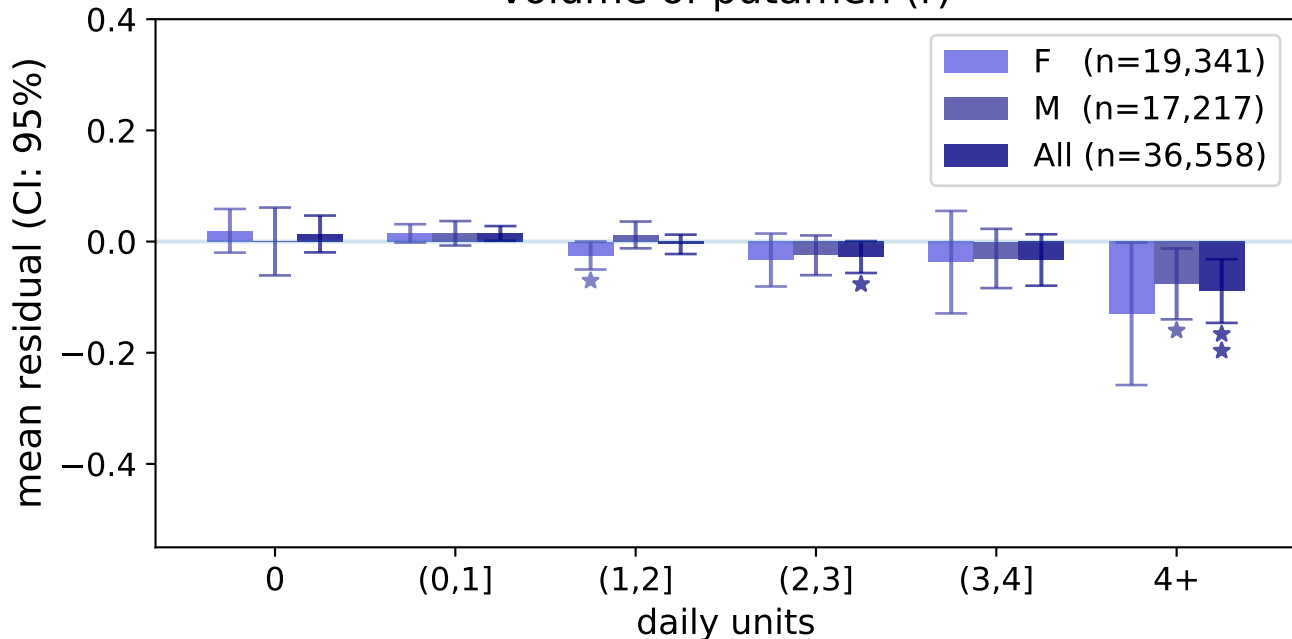

two-tailed test against [0,1] group: \* $p < 0.01$ , \*\* $p < 0.001$

# volume of pallidum (l)

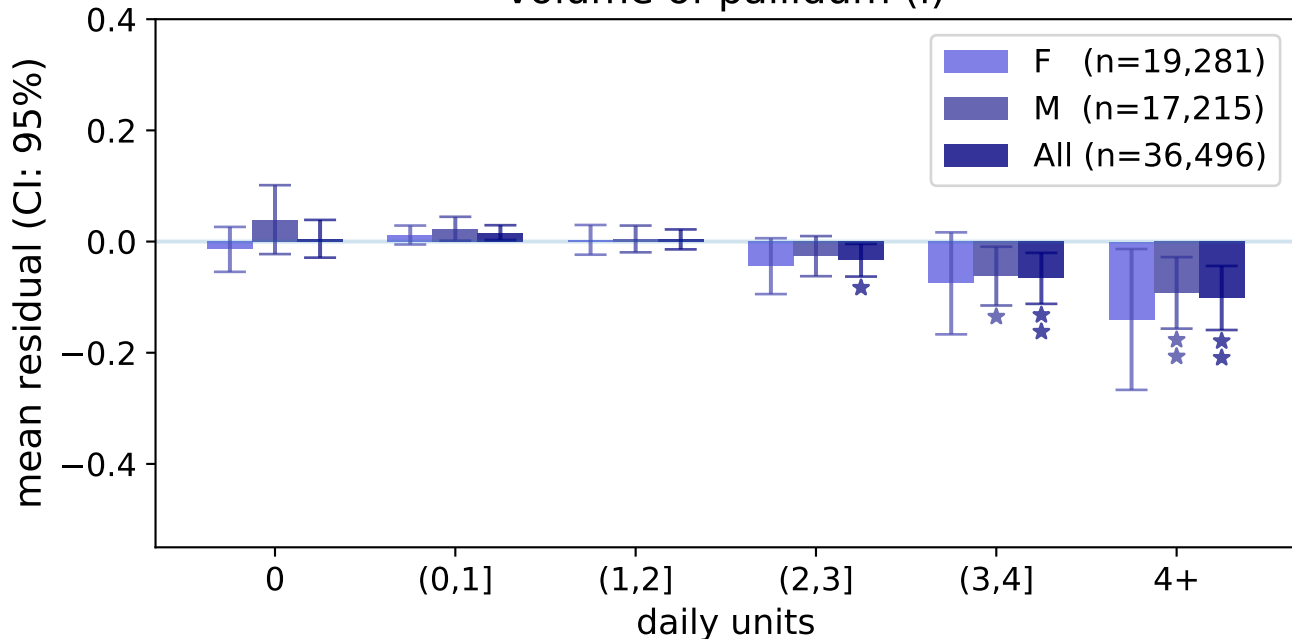

two-tailed test against [0,1] group: \*  $p < 0.01$ , \* \*  $p < 0.001$

# volume of pallidum (r)

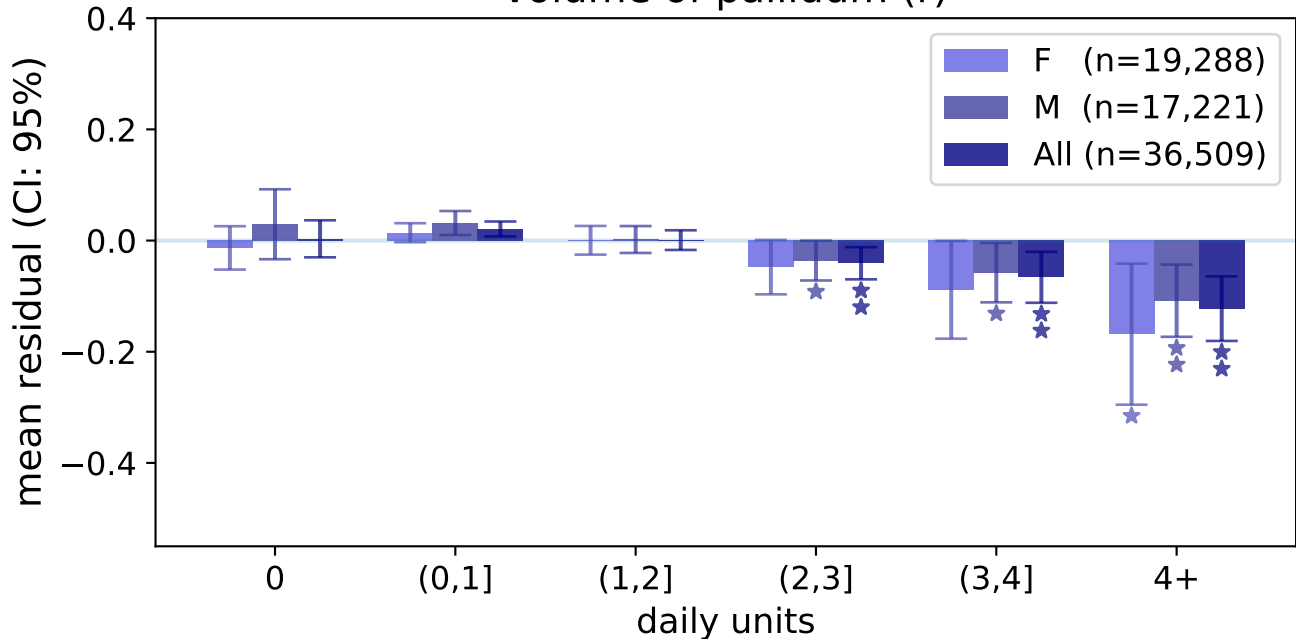

two-tailed test against [0,1] group: \* $p < 0.01$ , \*\* $p < 0.001$

# volume of hippocampus (l)

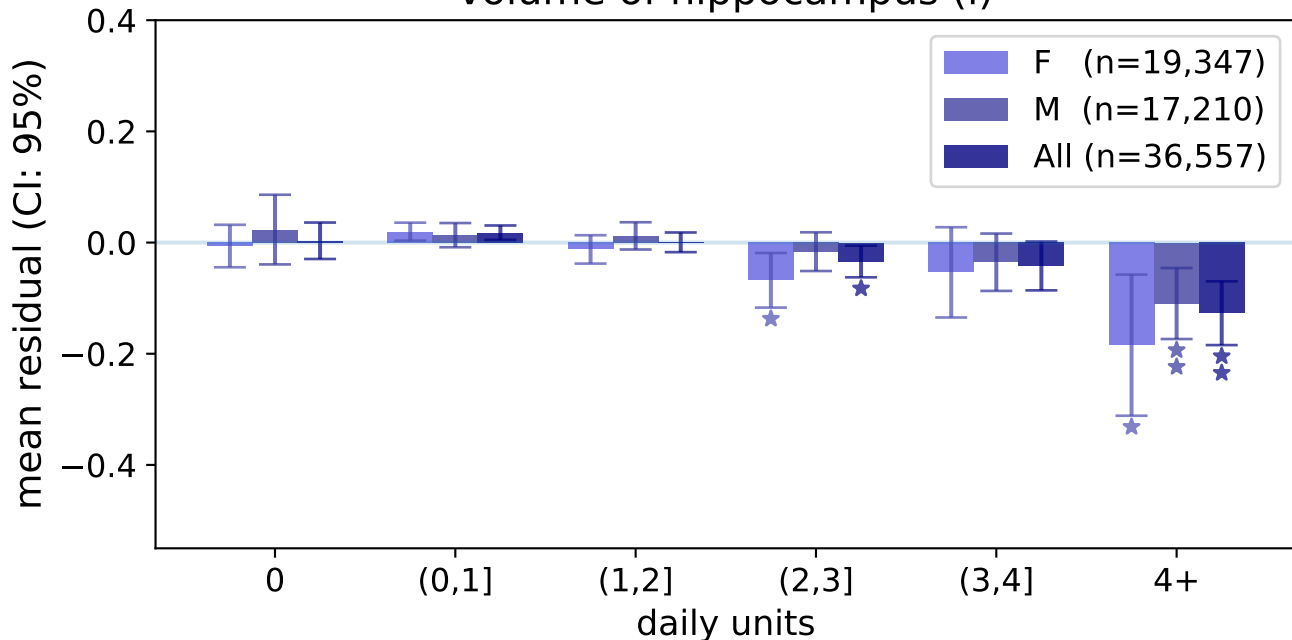

two-tailed test against [0,1] group: \* $p < 0.01$ , \*\* $p < 0.001$

# volume of hippocampus (r)

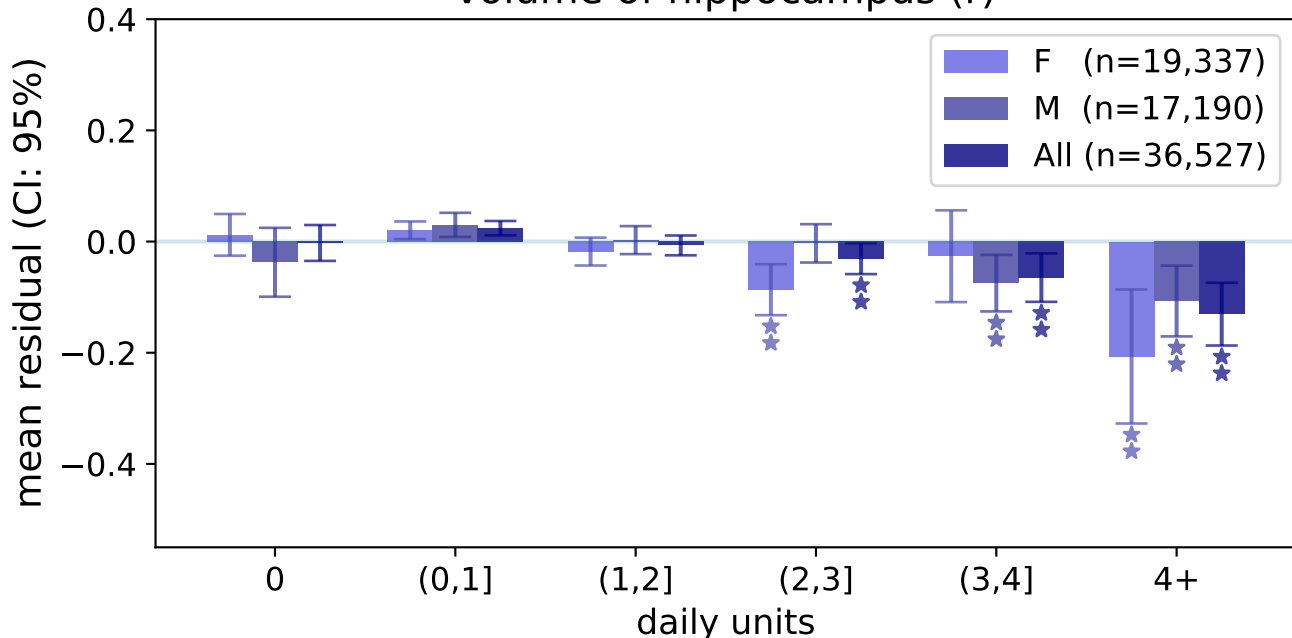

## volume of amygdala (l)

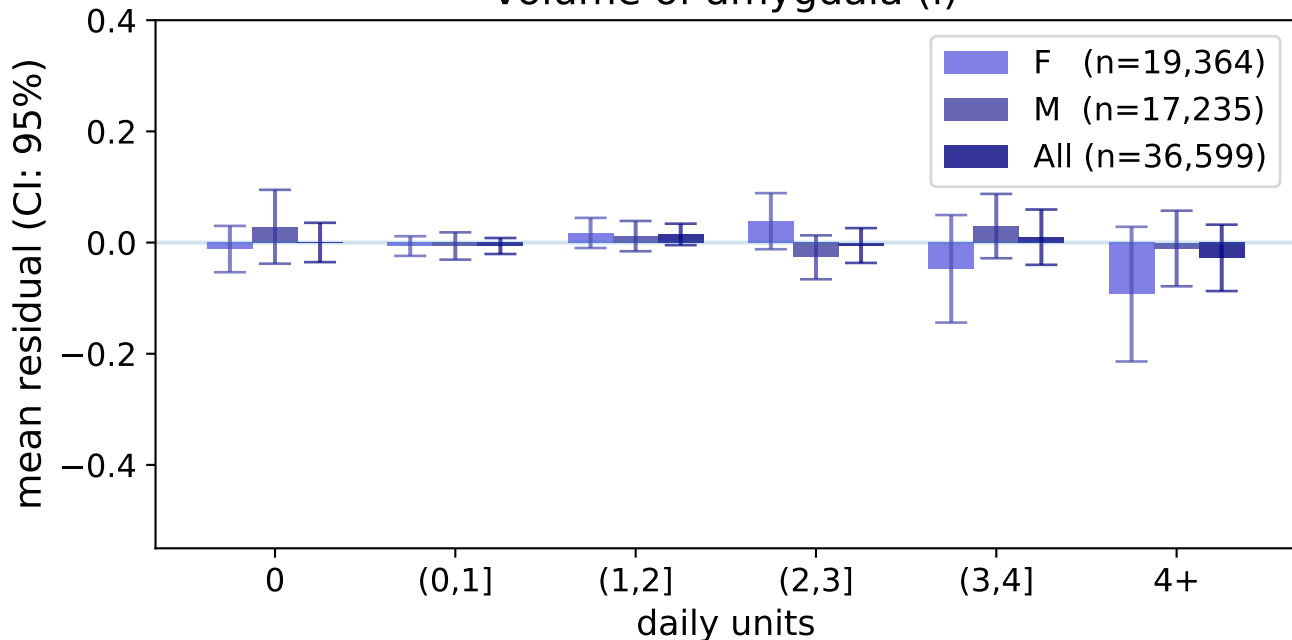

two-tailed test against [0,1] group: \* $p < 0.01$ , \*\* $p < 0.001$

# volume of amygdala (r)

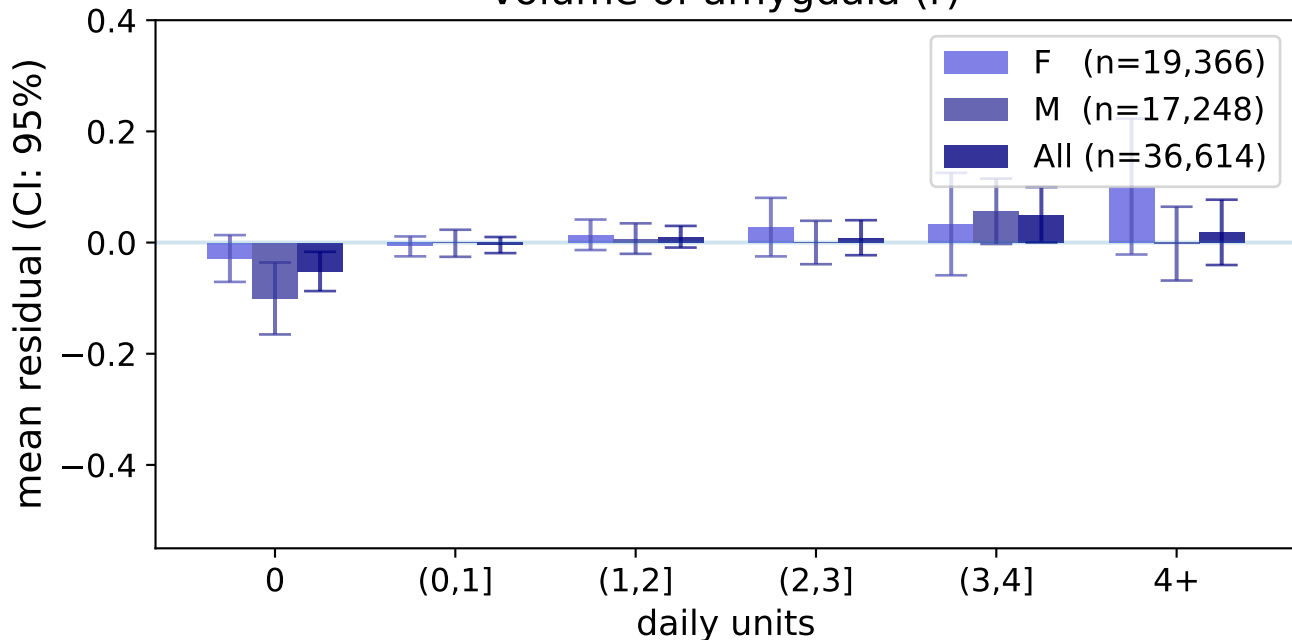

two-tailed test against [0,1] group: \* $p < 0.01$ , \* \*  $p < 0.001$

## volume of accumbens (l)

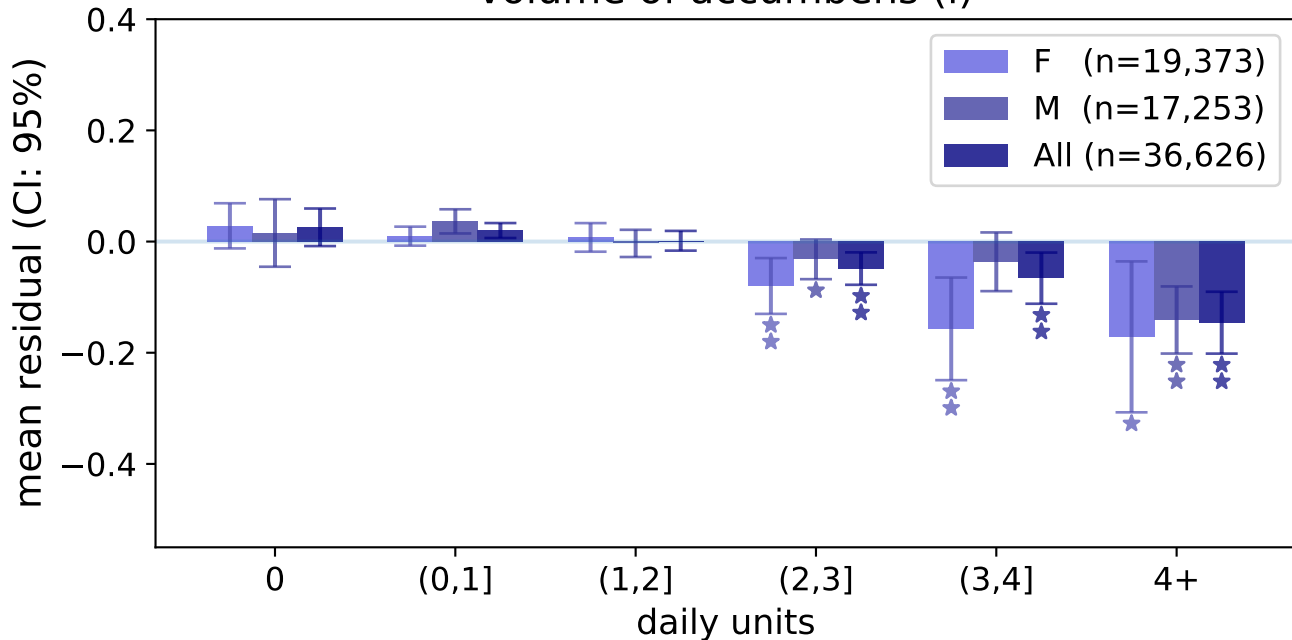

two-tailed test against [0,1] group: \*  $p < 0.01$ , \*\*  $p < 0.001$

# volume of accumbens (r)

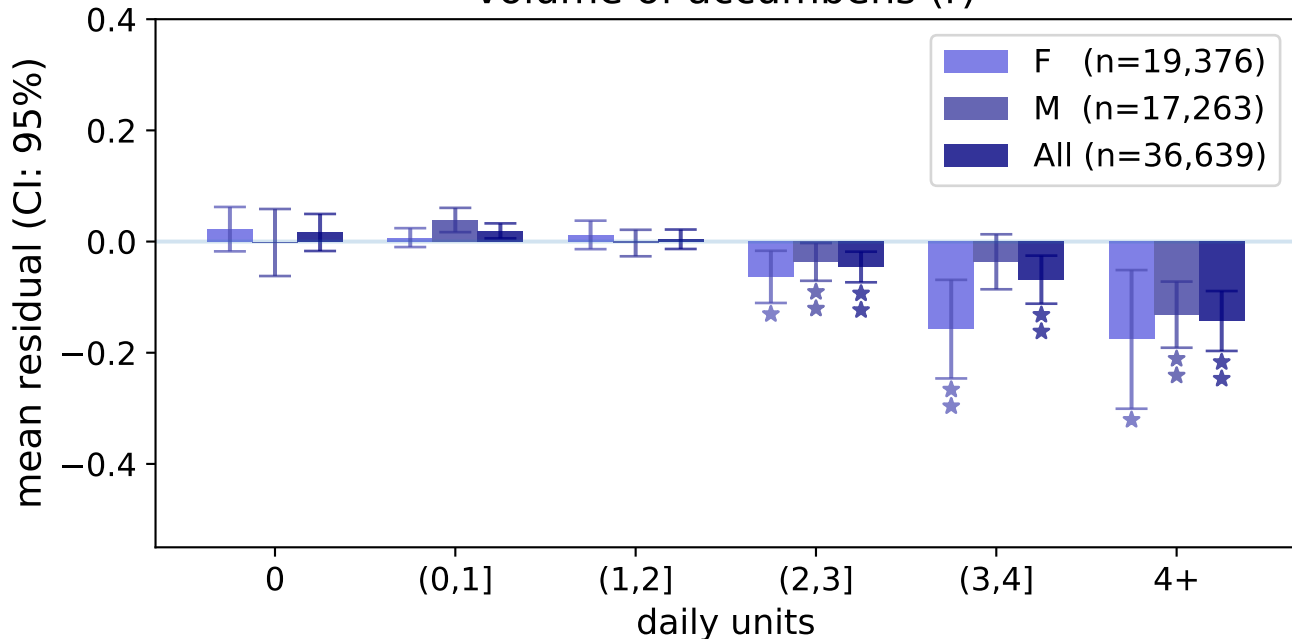

two-tailed test against [0,1] group: \* $p < 0.01$ , \*\* $p < 0.001$

# gmv in frontal pole (I)

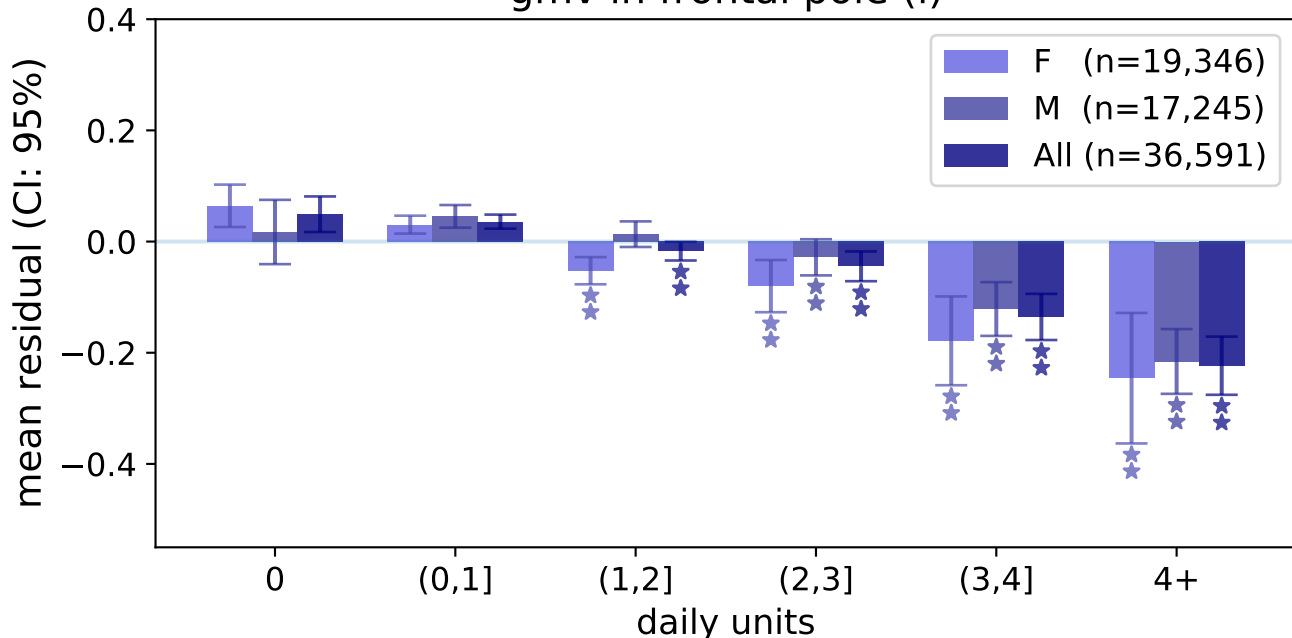

two-tailed test against [0,1] group: \*  $p < 0.01$ , \* \*  $p < 0.001$

# gmv in frontal pole (r)

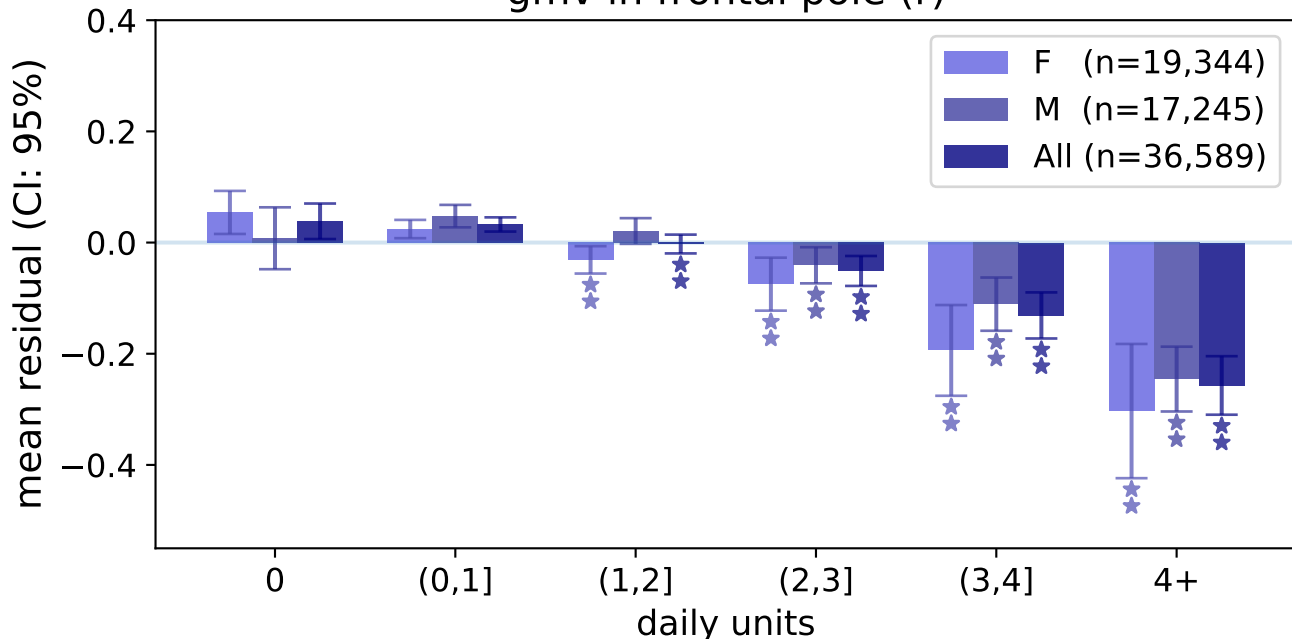

two-tailed test against [0,1] group: \*  $p < 0.01$ , \*\*  $p < 0.001$

# gmv in insular cortex (I)

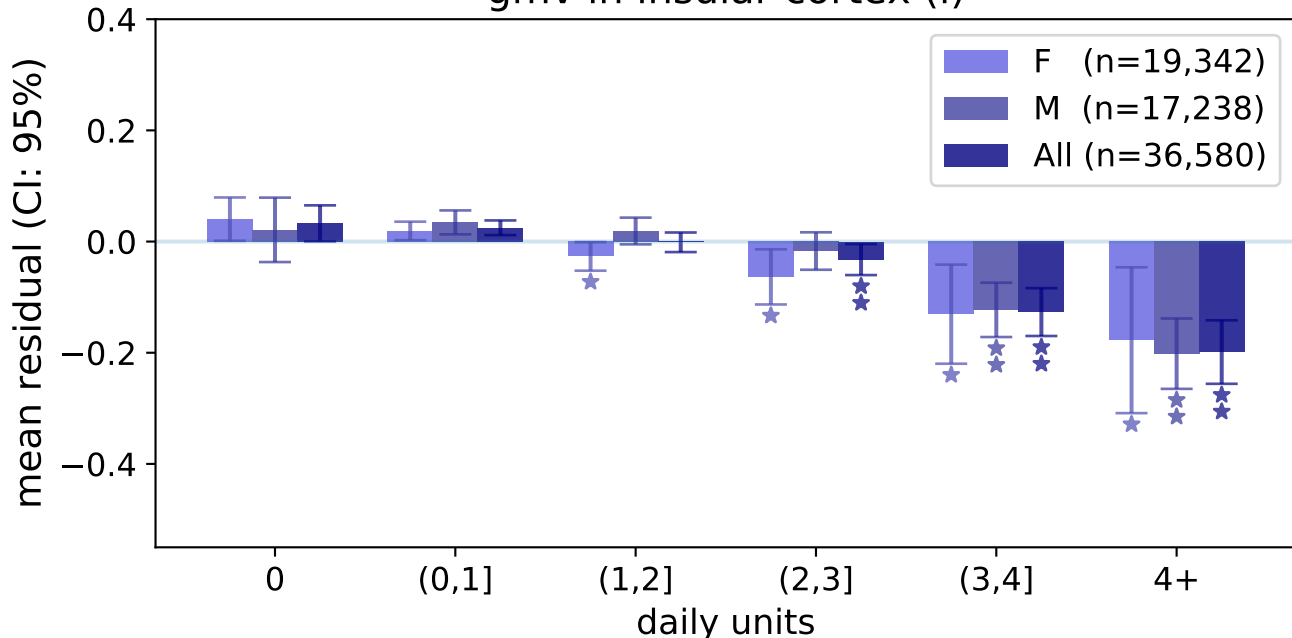

two-tailed test against [0,1] group: \*  $p < 0.01$ , \*\*  $p < 0.001$

# gmv in insular cortex (r)

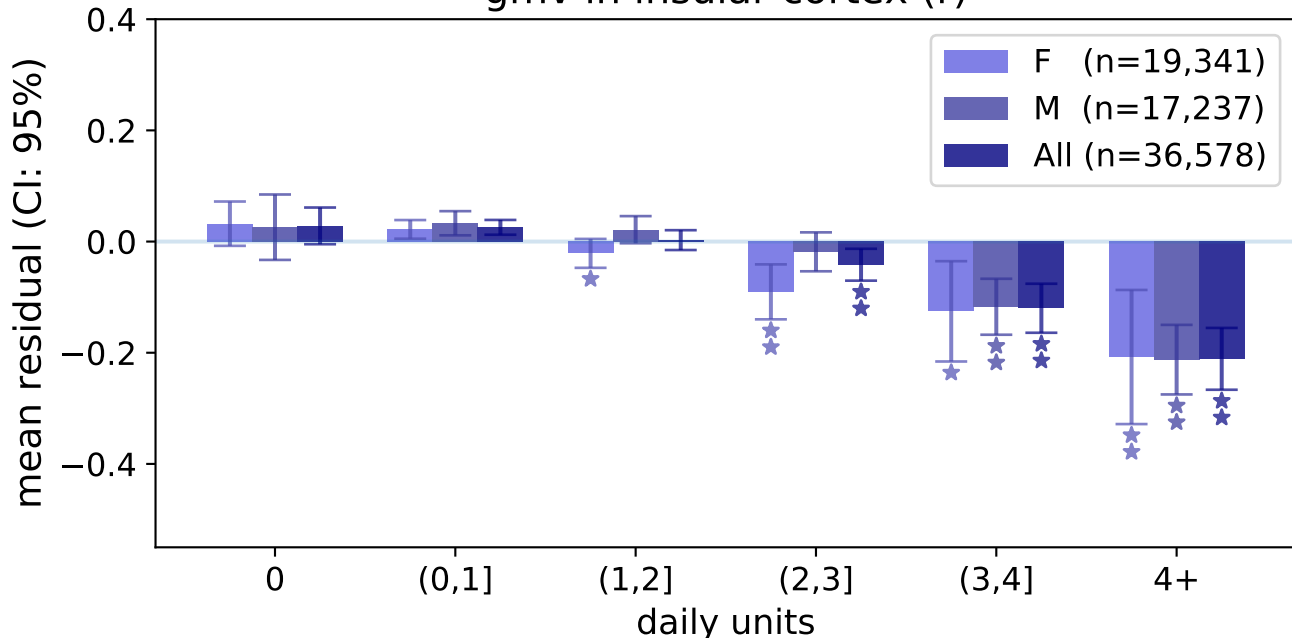

two-tailed test against [0,1] group: \* $p < 0.01$ , \*\* $p < 0.001$

# gmv in superior frontal gyrus (l)

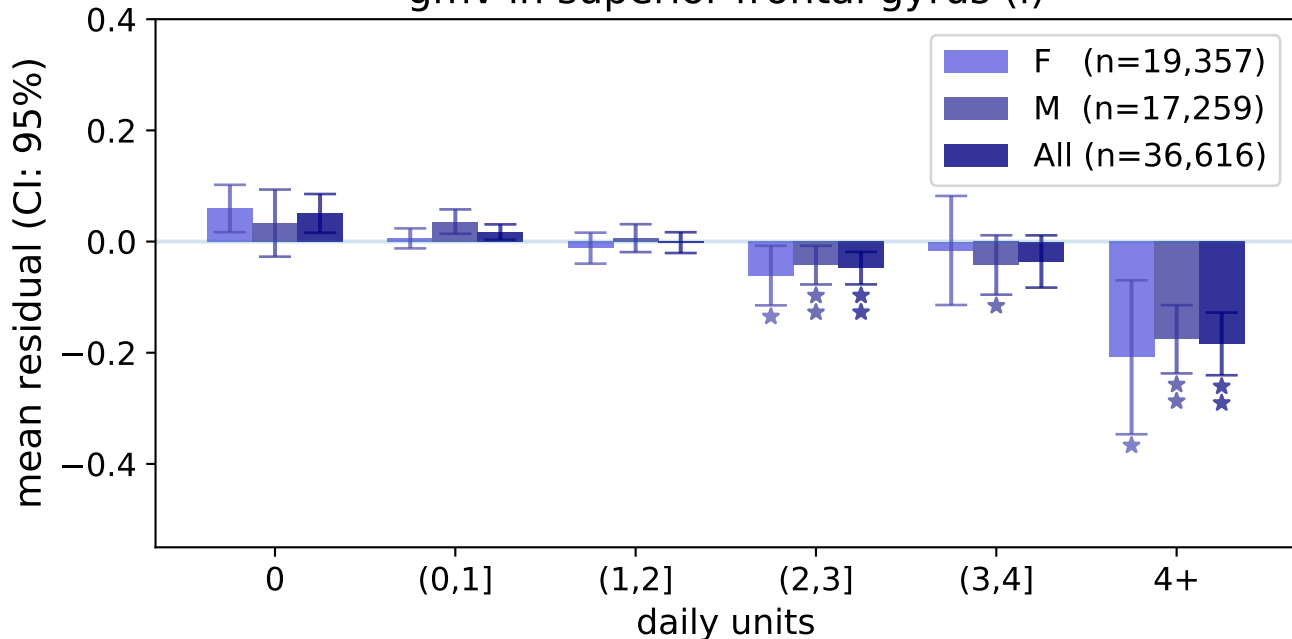

two-tailed test against [0,1] group: \* $p < 0.01$ , \*\* $p < 0.001$

# gmv in superior frontal gyrus (r)

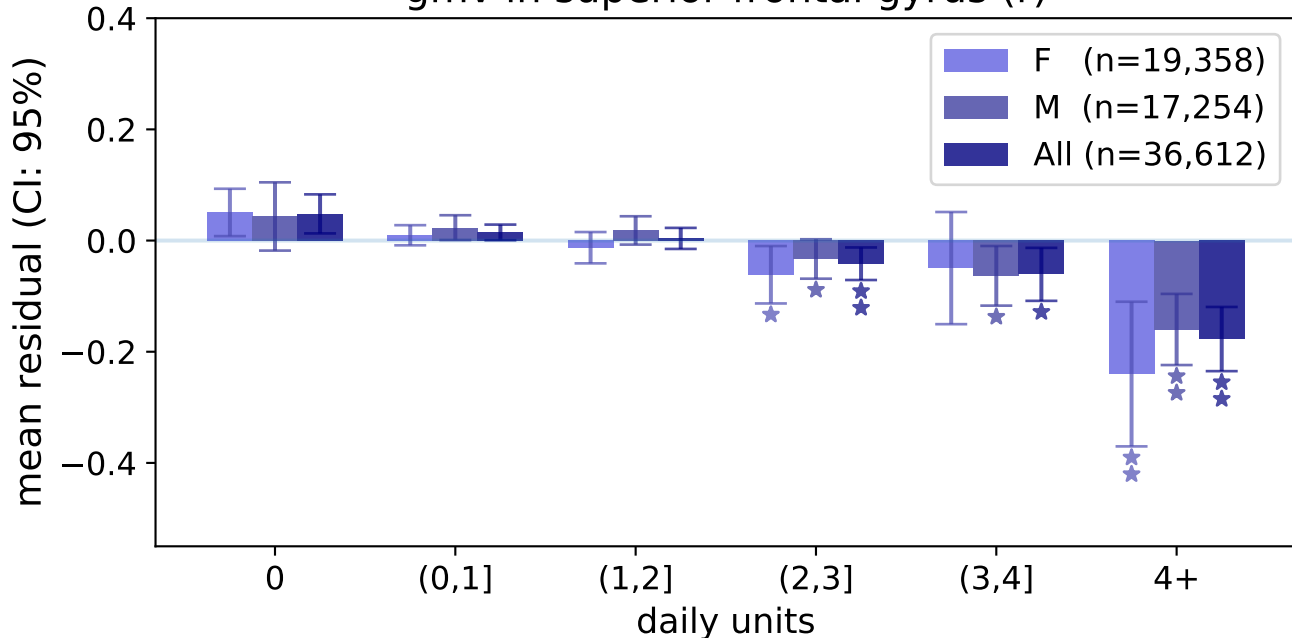

two-tailed test against [0,1] group: \* $p < 0.01$ , \*\* $p < 0.001$

# gmv in middle frontal gyrus (I)

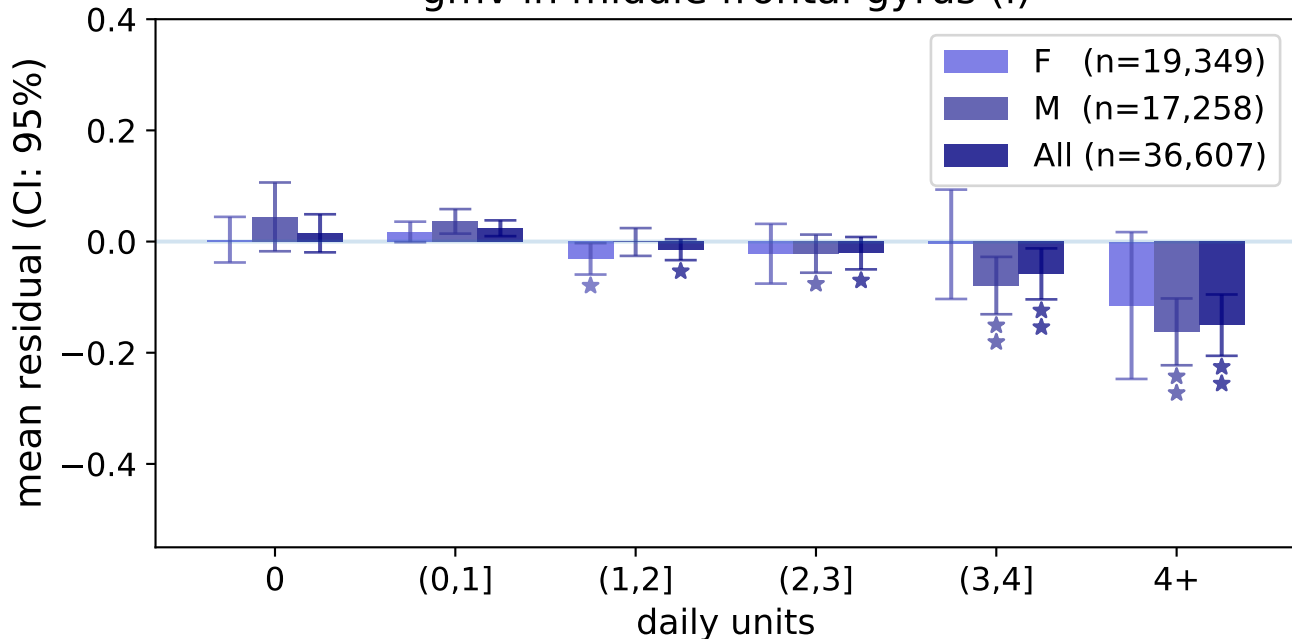

two-tailed test against [0,1] group: \*  $p < 0.01$ , \*\*  $p < 0.001$

# gmv in middle frontal gyrus (r)

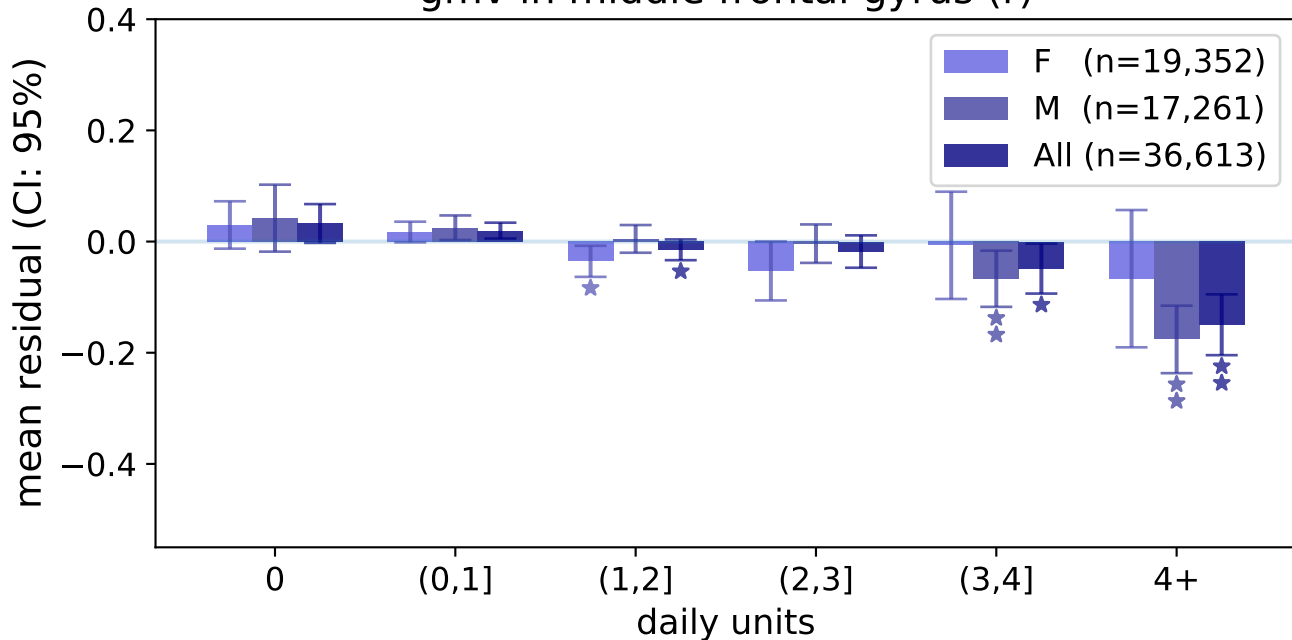

two-tailed test against [0,1] group: \* $p < 0.01$ , \*\* $p < 0.001$

# gmv in inferior frontal gyrus, pars triangularis (I)

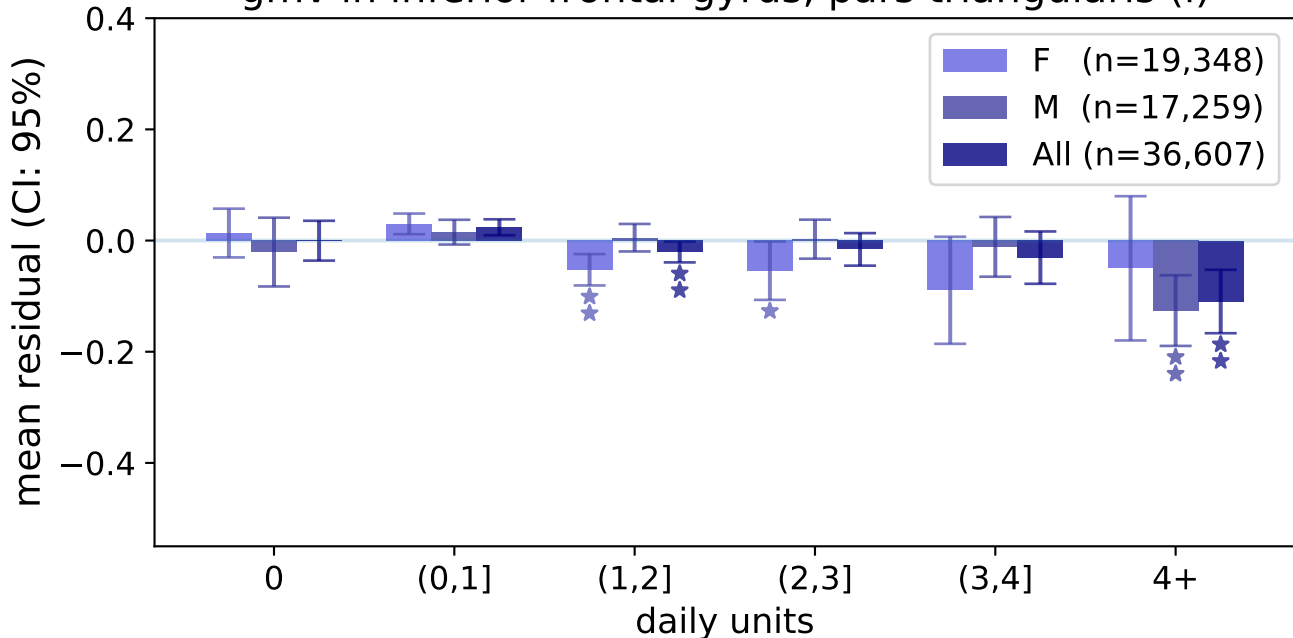

# gmv in inferior frontal gyrus, pars triangularis (r)

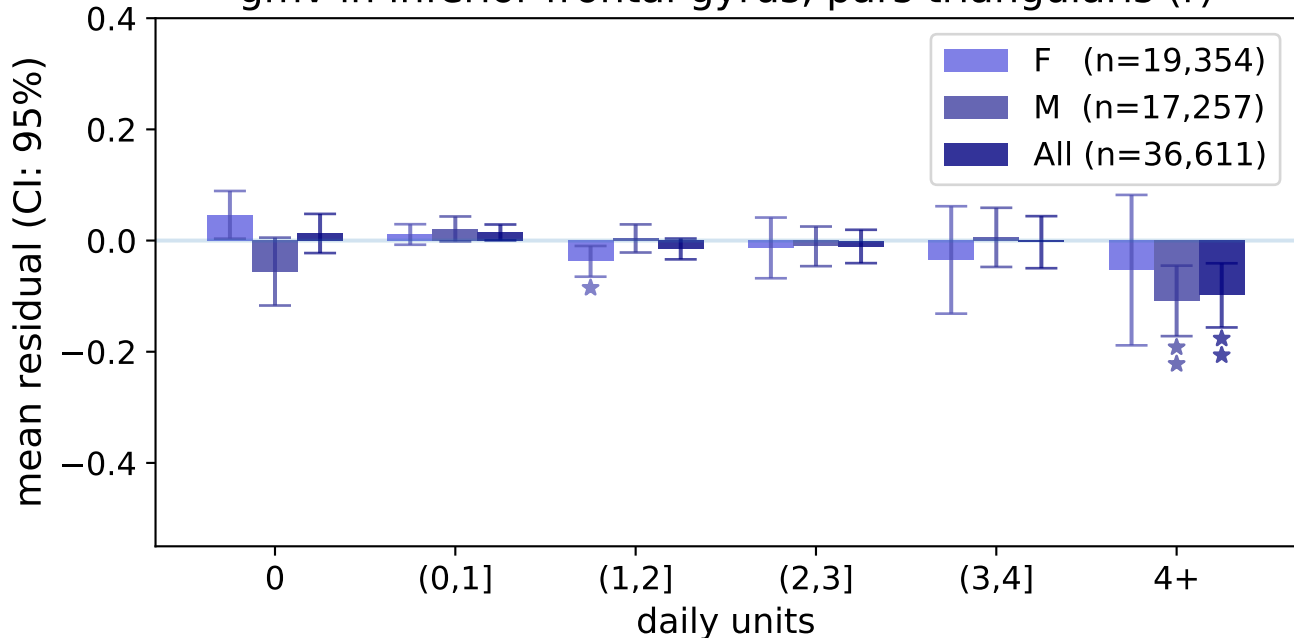

# gmv in inferior frontal gyrus, pars opercularis (I)

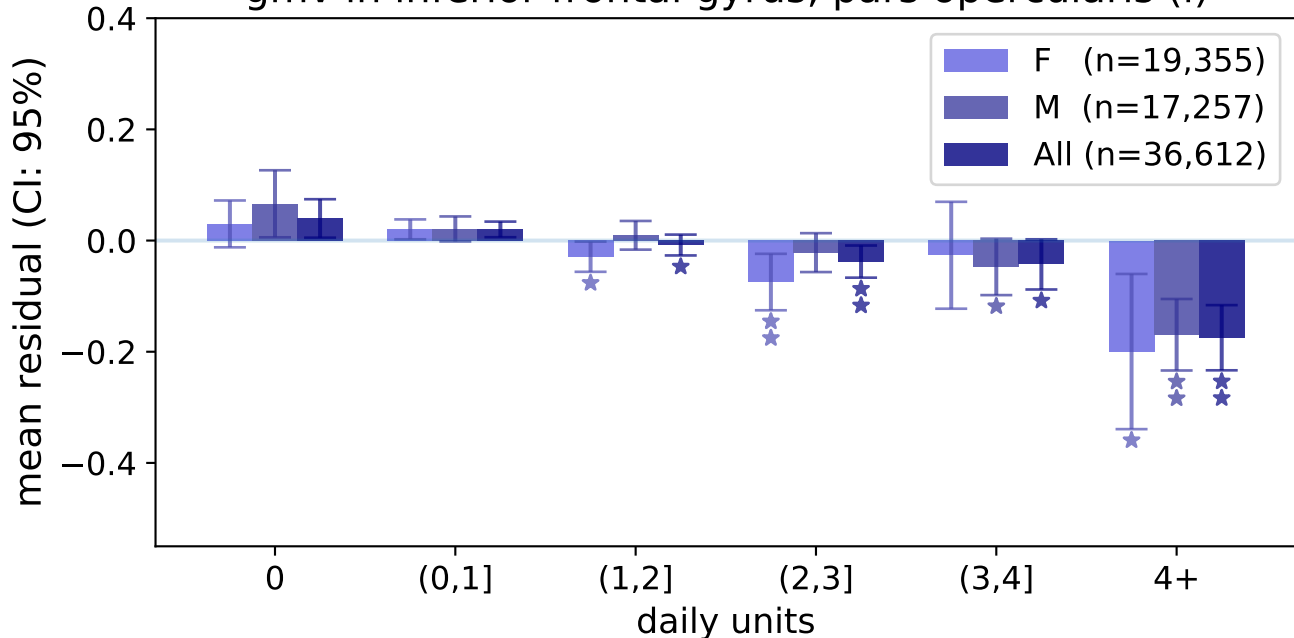

two-tailed test against [0,1] group: \* $p < 0.01$ , \* \*  $p < 0.001$

# gmv in inferior frontal gyrus, pars opercularis (r)

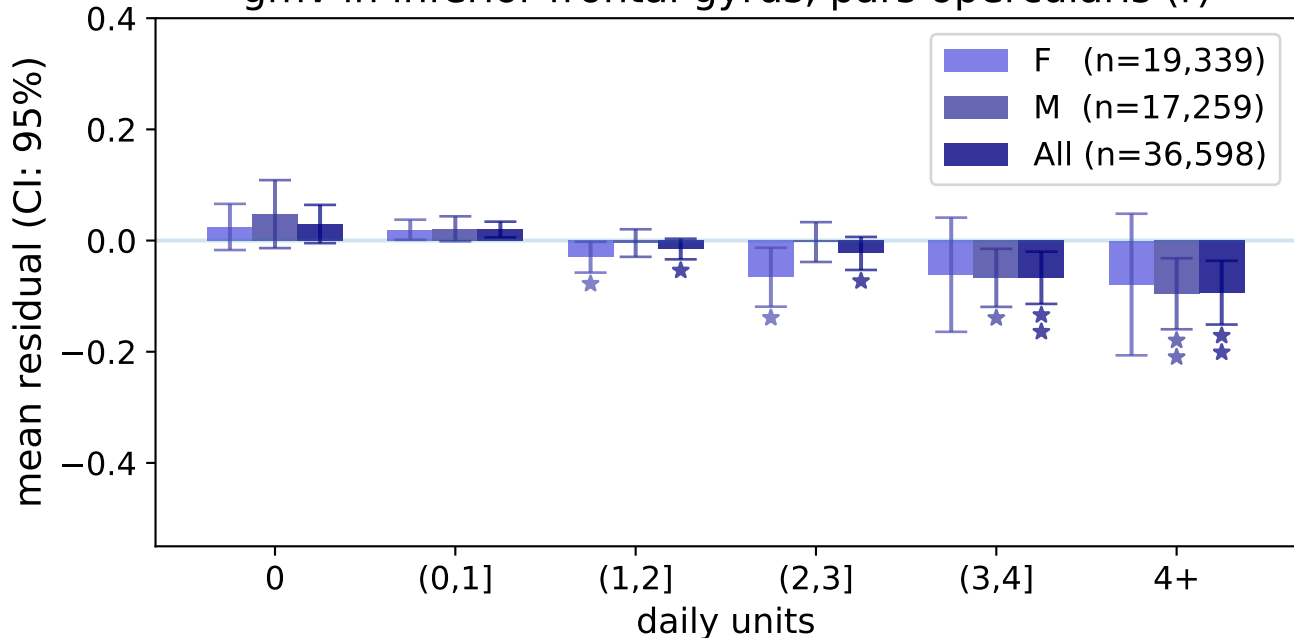

# gmv in precentral gyrus (I)

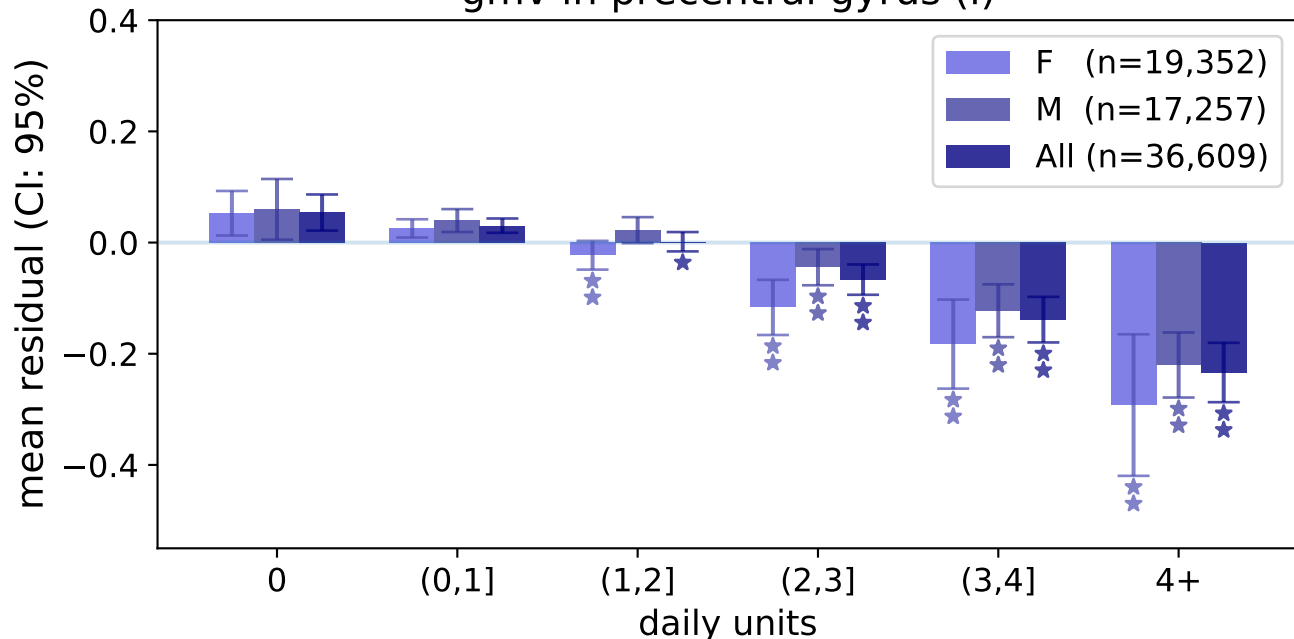

two-tailed test against [0,1] group: \*  $p < 0.01$ , \* \*  $p < 0.001$

# gmv in precentral gyrus (r)

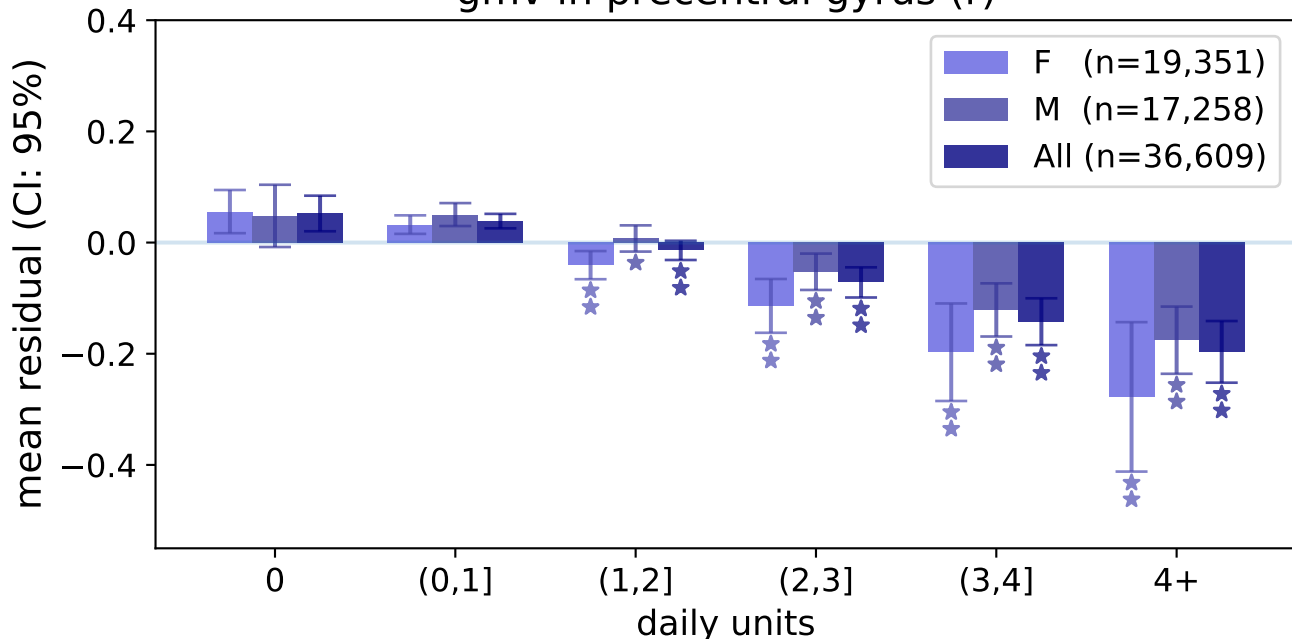

two-tailed test against [0,1] group: \*  $p < 0.01$ , \* \*  $p < 0.001$

# gmv in temporal pole (I)

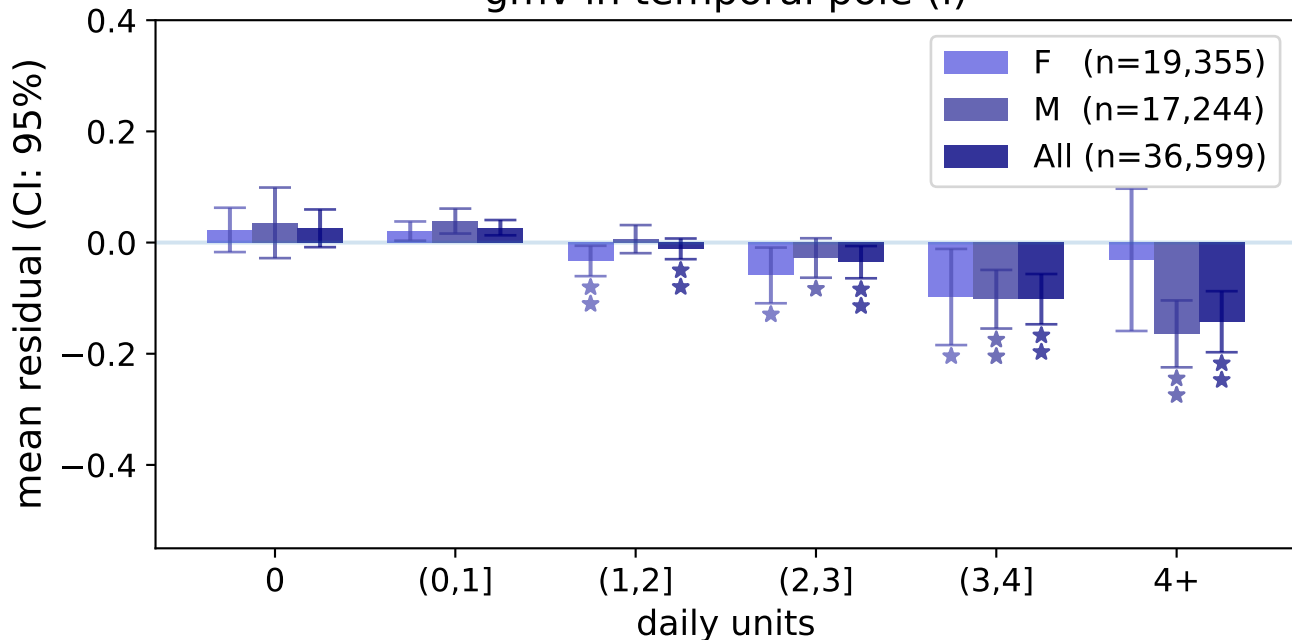

two-tailed test against [0,1] group: \*  $p < 0.01$ , \* \*  $p < 0.001$

# gmv in temporal pole (r)

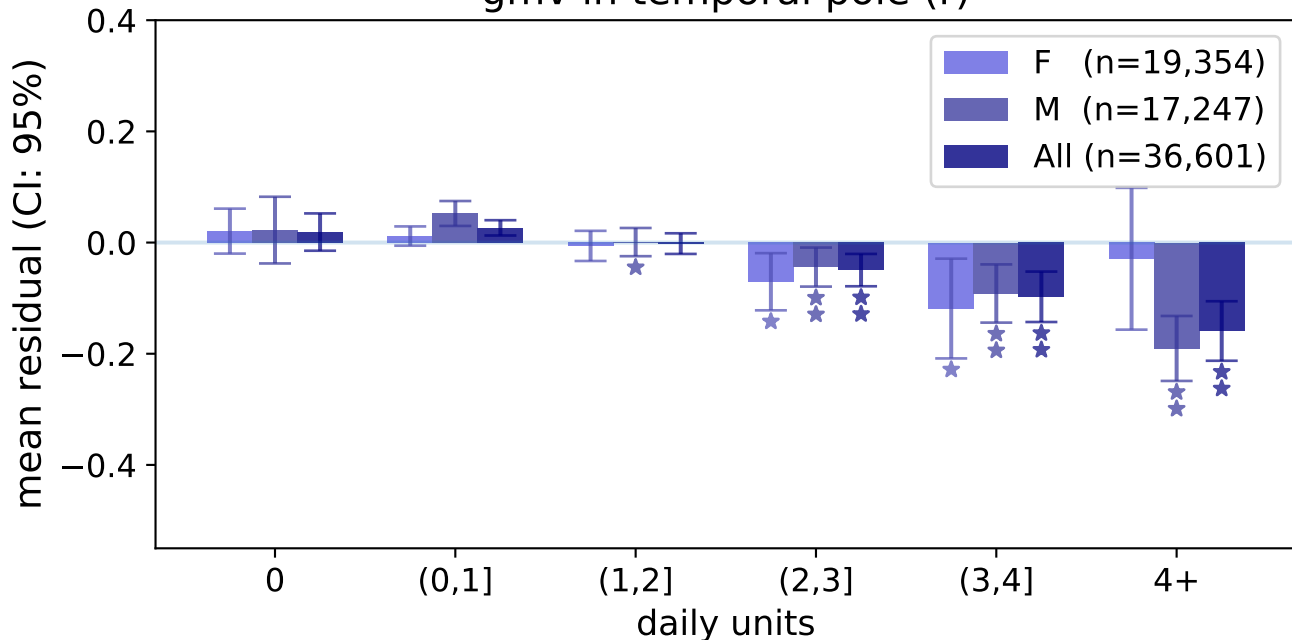

two-tailed test against [0,1] group: \*  $p < 0.01$ , \* \*  $p < 0.001$

# gmv in superior temporal gyrus, anterior division (I)

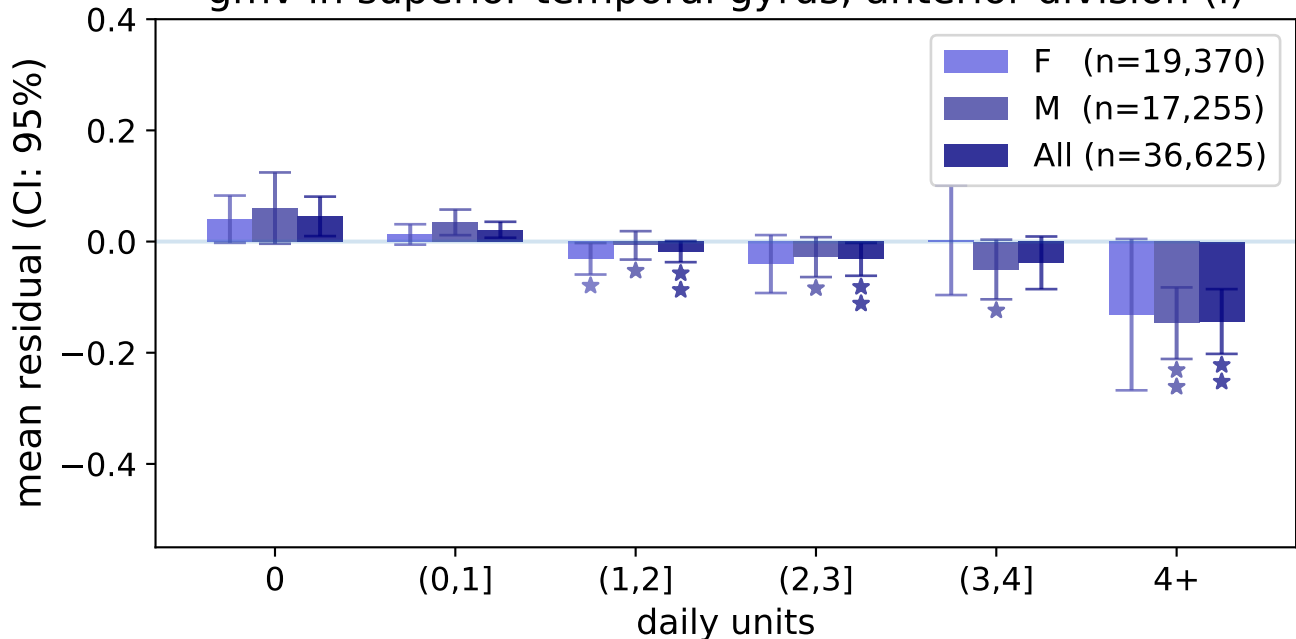

two-tailed test against [0,1] group: \*  $p < 0.01$ , \* \*  $p < 0.001$

# gmv in superior temporal gyrus, anterior division (r)

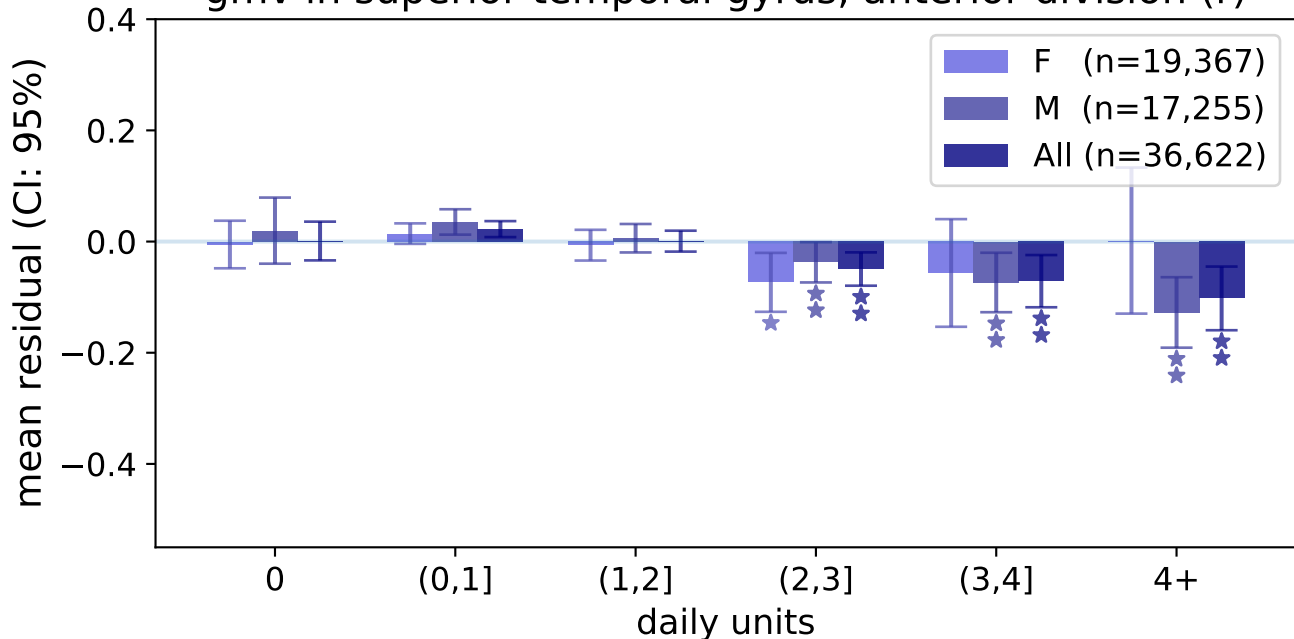

# gmv in superior temporal gyrus, posterior division (l)

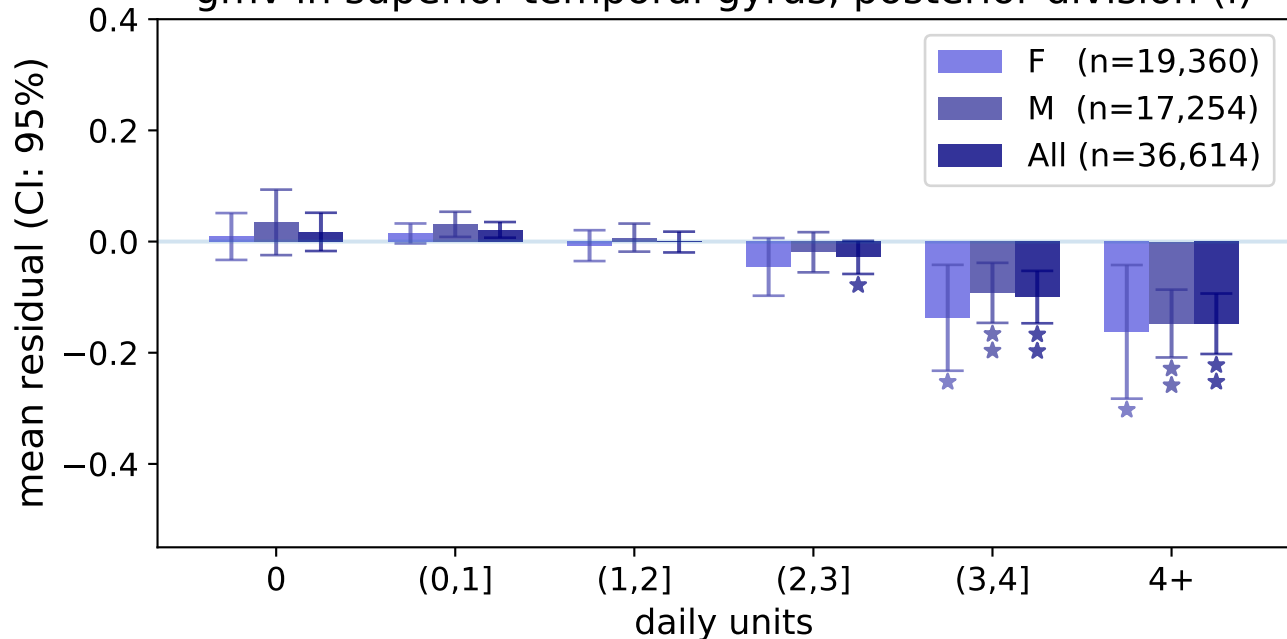

# gmv in superior temporal gyrus, posterior division (r)

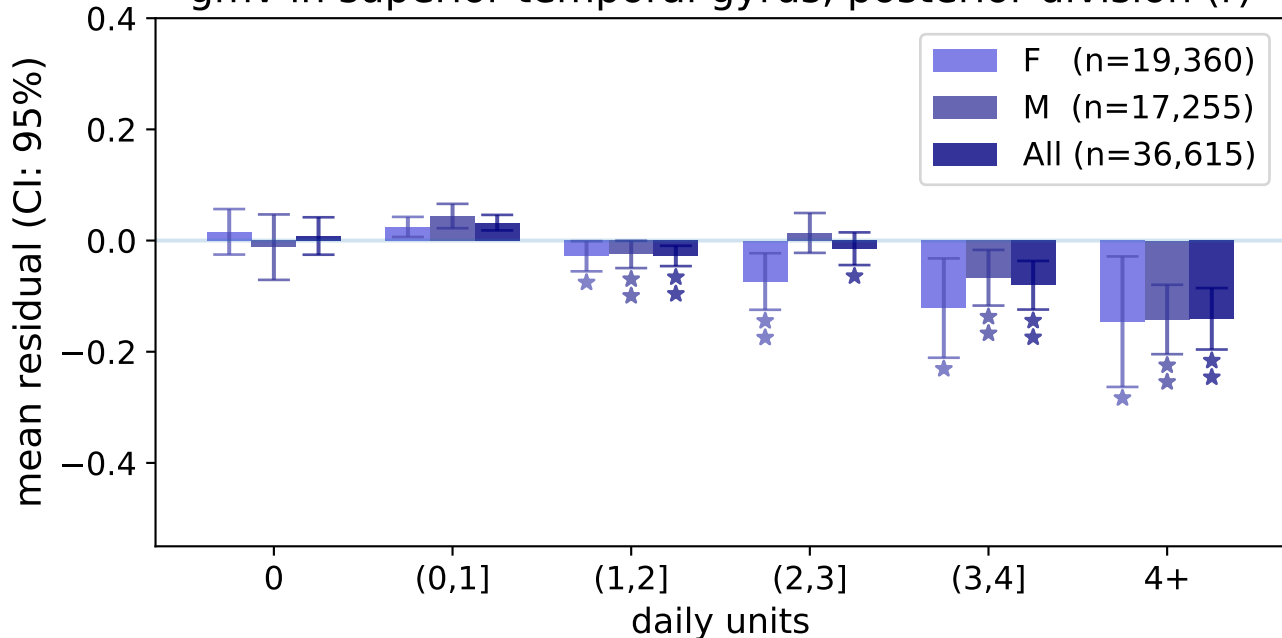

# gmv in middle temporal gyrus, anterior division (I)

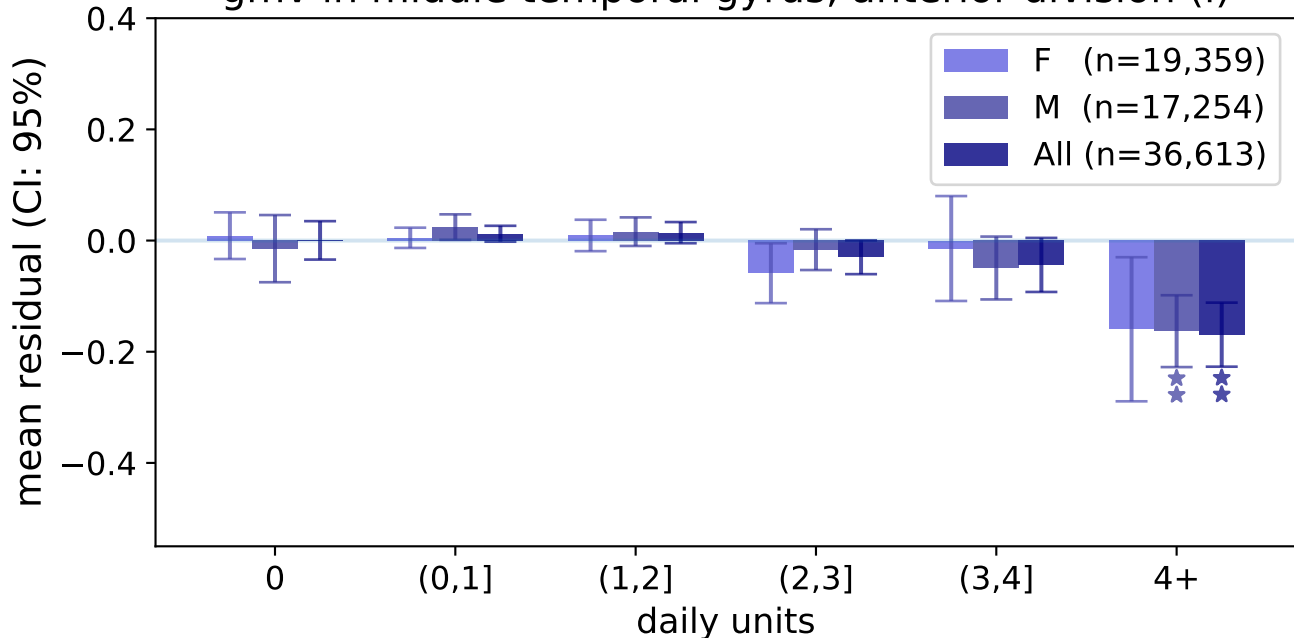

two-tailed test against [0,1] group: \*  $p < 0.01$ , \* \*  $p < 0.001$

# gmv in middle temporal gyrus, anterior division (r)

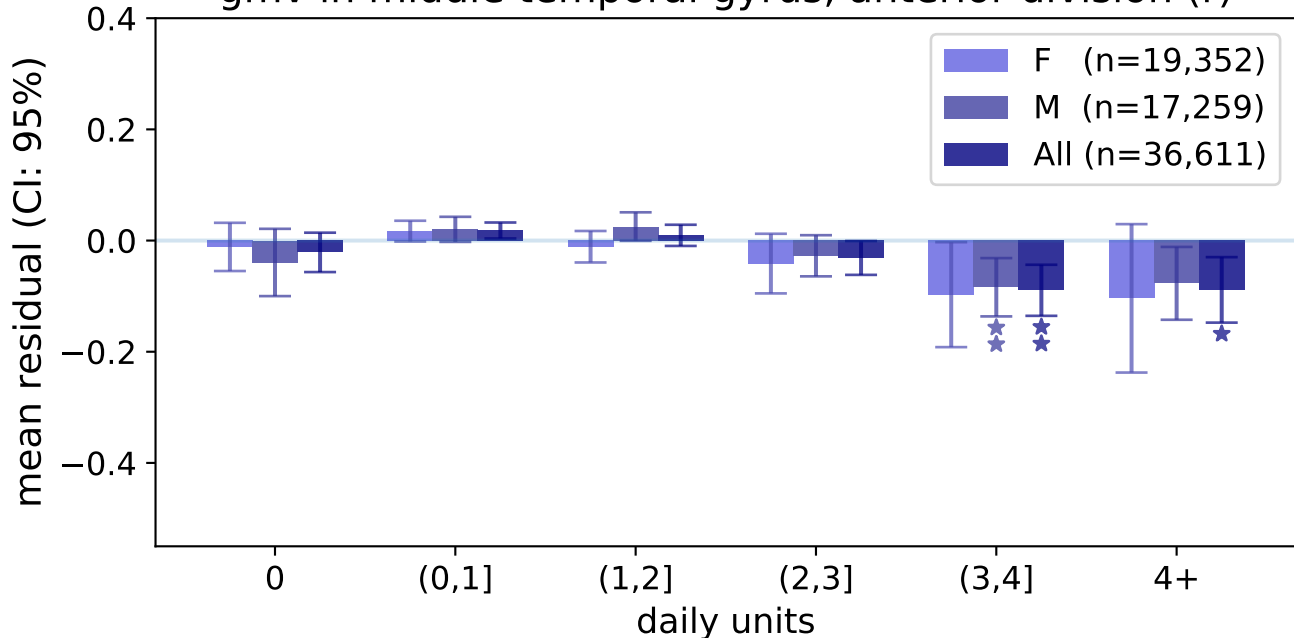

# gmv in middle temporal gyrus, posterior division (I)

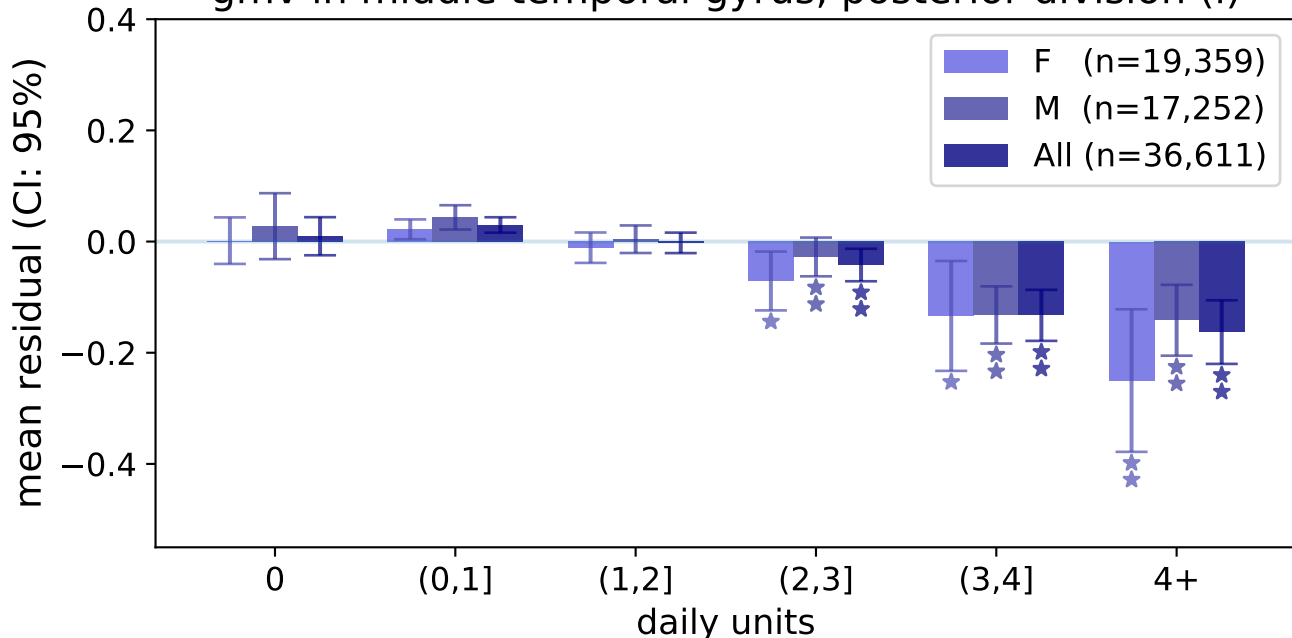

two-tailed test against [0,1] group: \*  $p < 0.01$ , \* \*  $p < 0.001$

# gmv in middle temporal gyrus, posterior division (r)

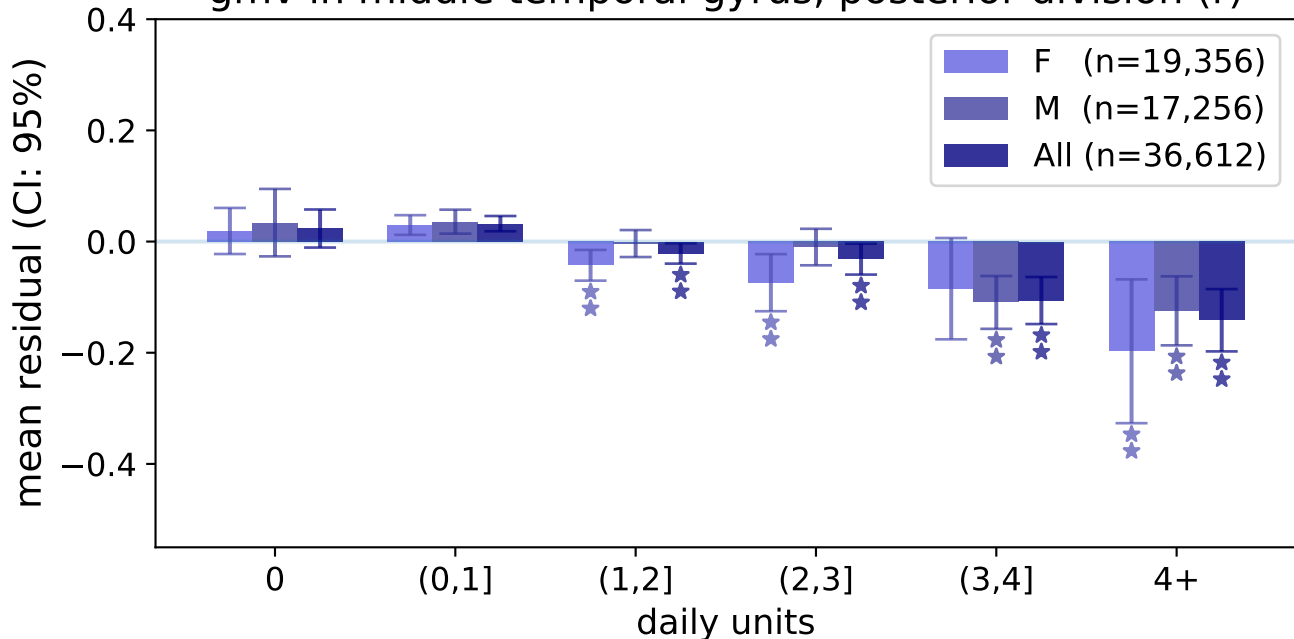

two-tailed test against [0,1] group: \*  $p < 0.01$ , \* \*  $p < 0.001$

# gmv in middle temporal gyrus, temporooccipital part (I)

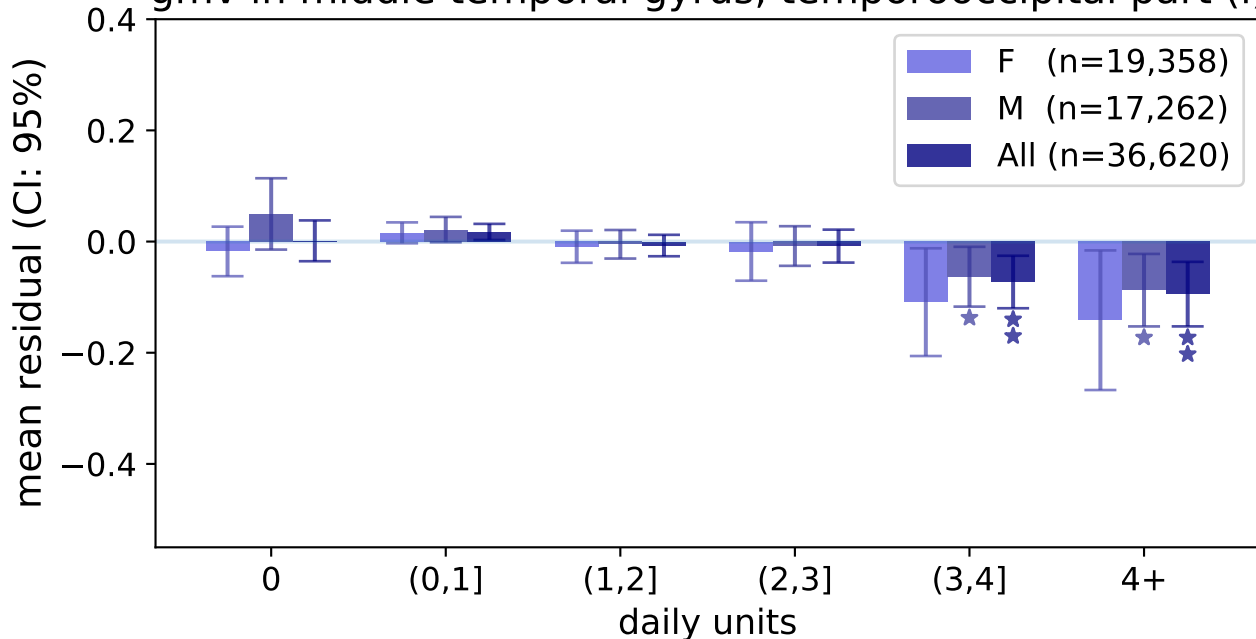

# gmv in middle temporal gyrus, temporooccipital part (r)

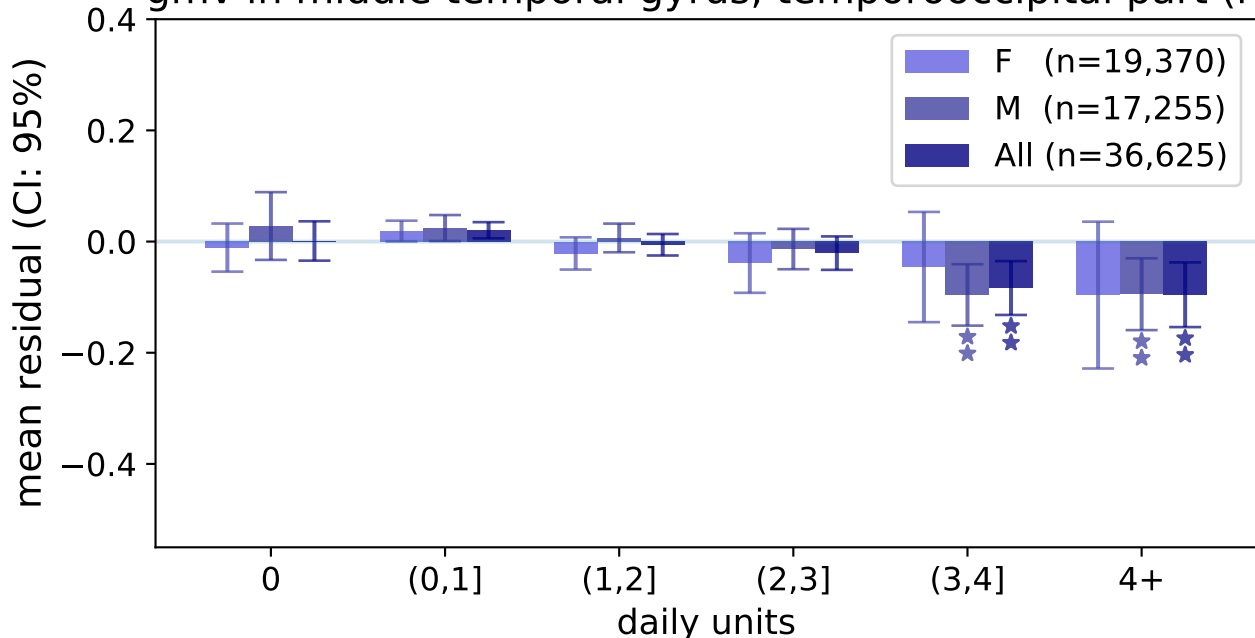

# gmv in inferior temporal gyrus, anterior division (I)

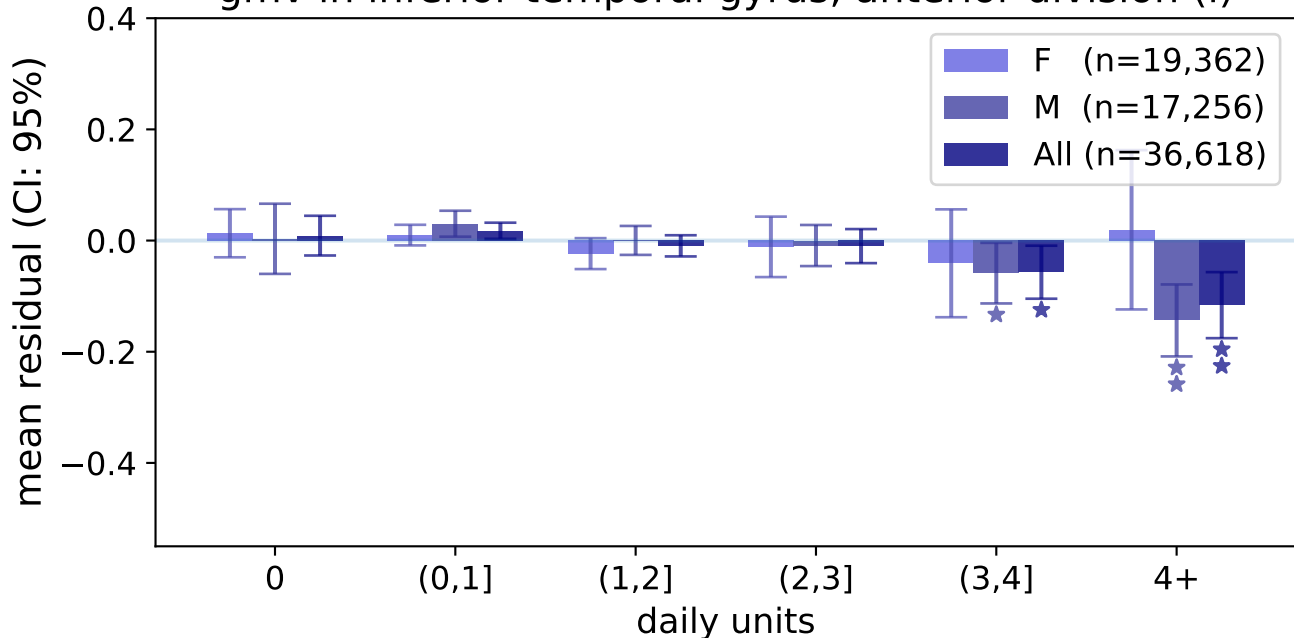

# gmv in inferior temporal gyrus, anterior division (r)

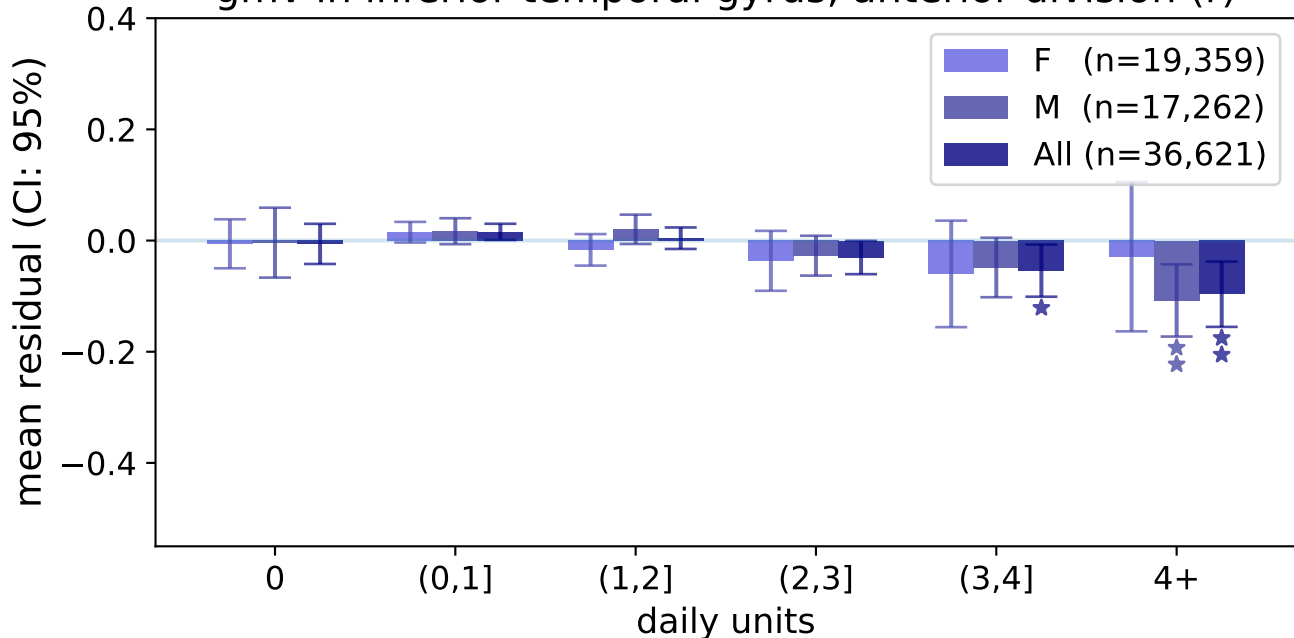

# gmv in inferior temporal gyrus, posterior division (I)

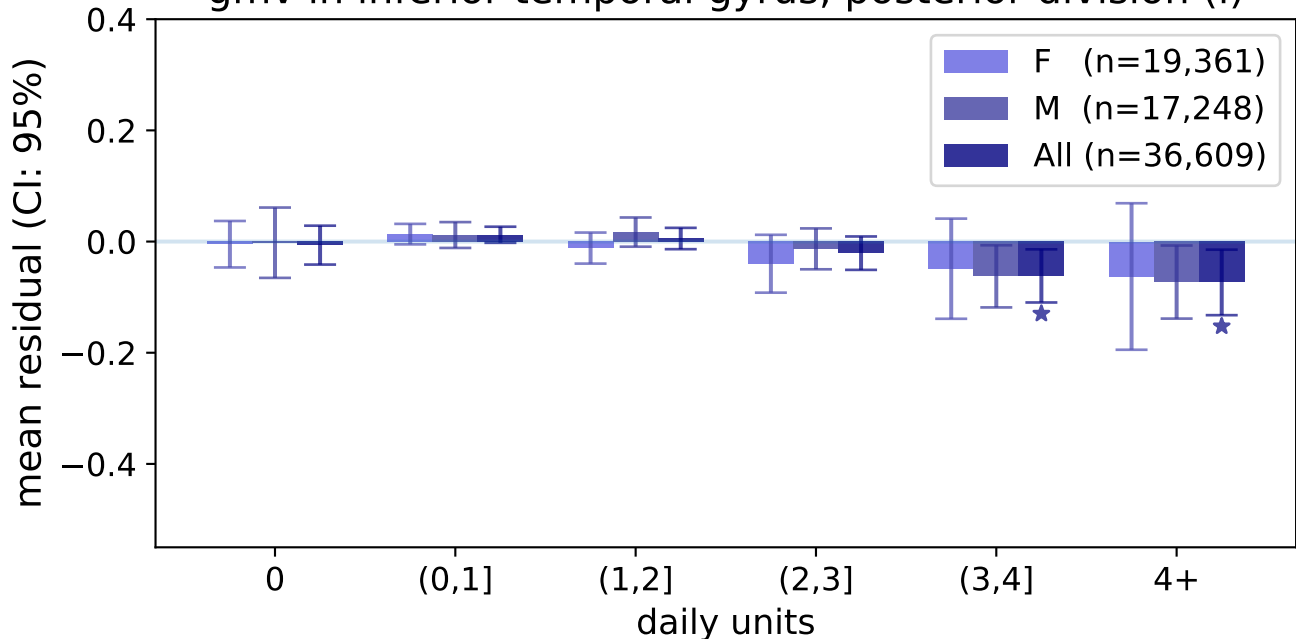

# gmv in inferior temporal gyrus, posterior division (r)

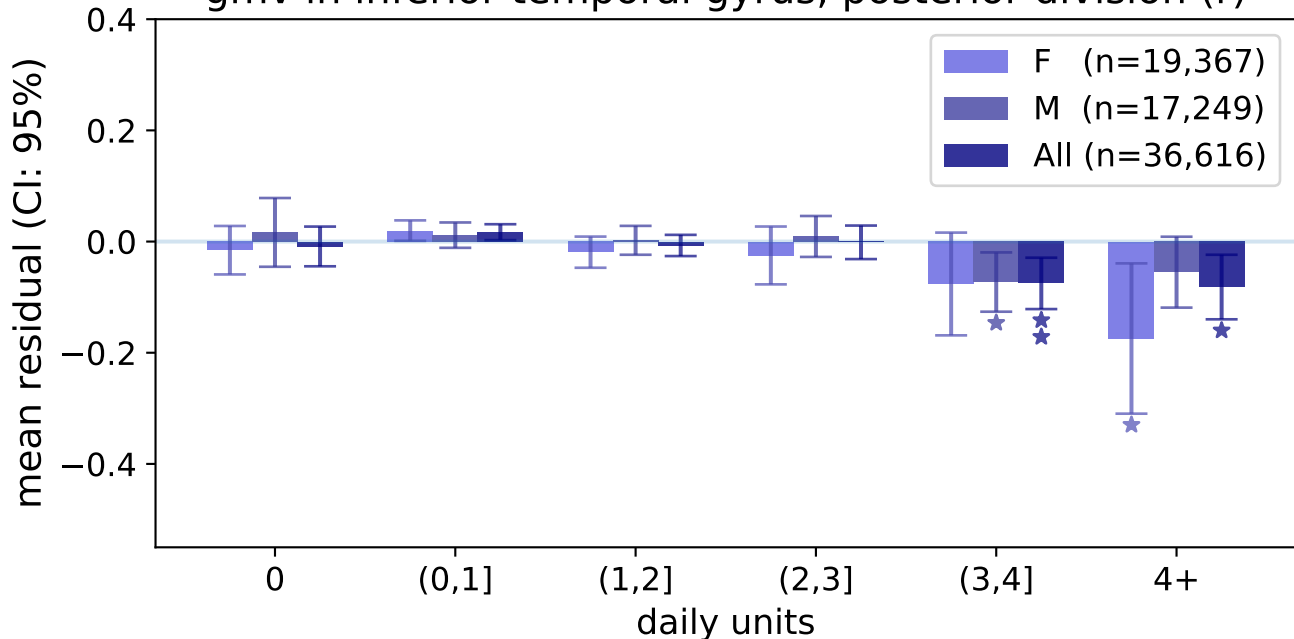

# gmv in inferior temporal gyrus, temporooccipital part (I)

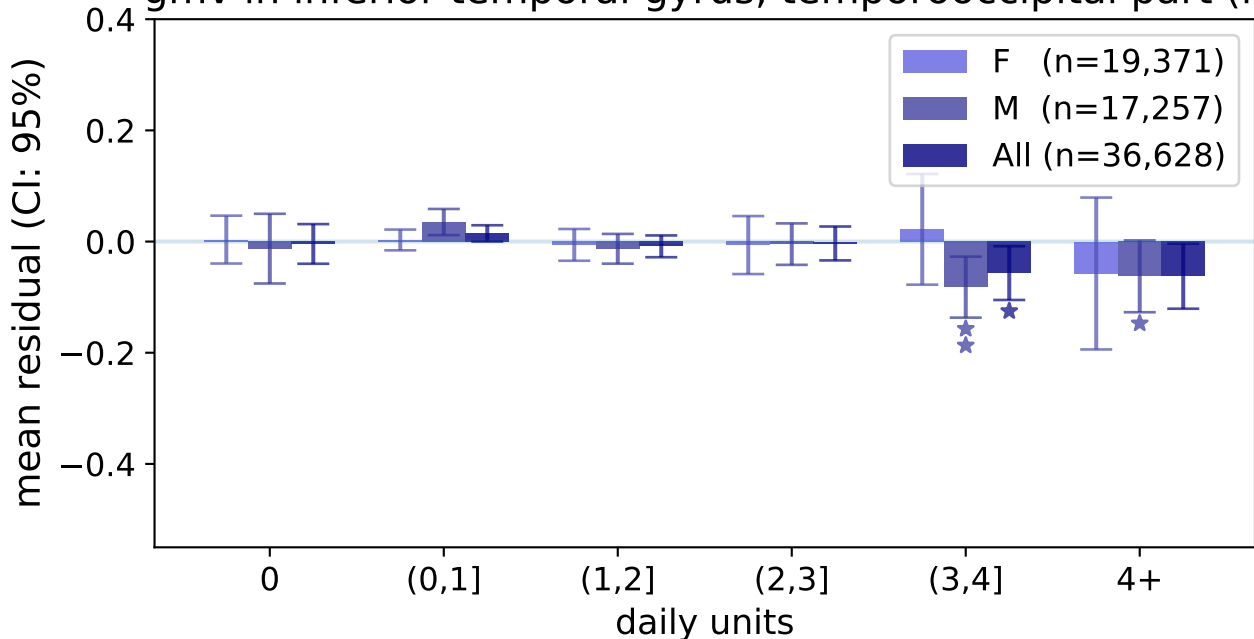

# gmv in inferior temporal gyrus, temporooccipital part (r)

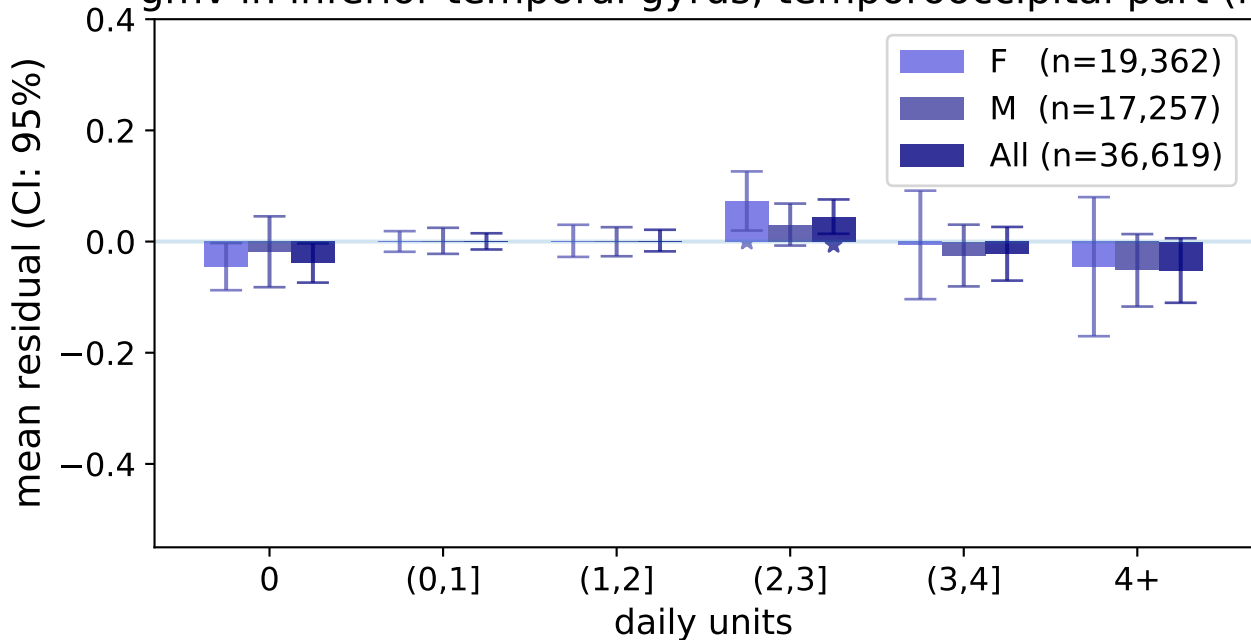

# gmv in postcentral gyrus (I)

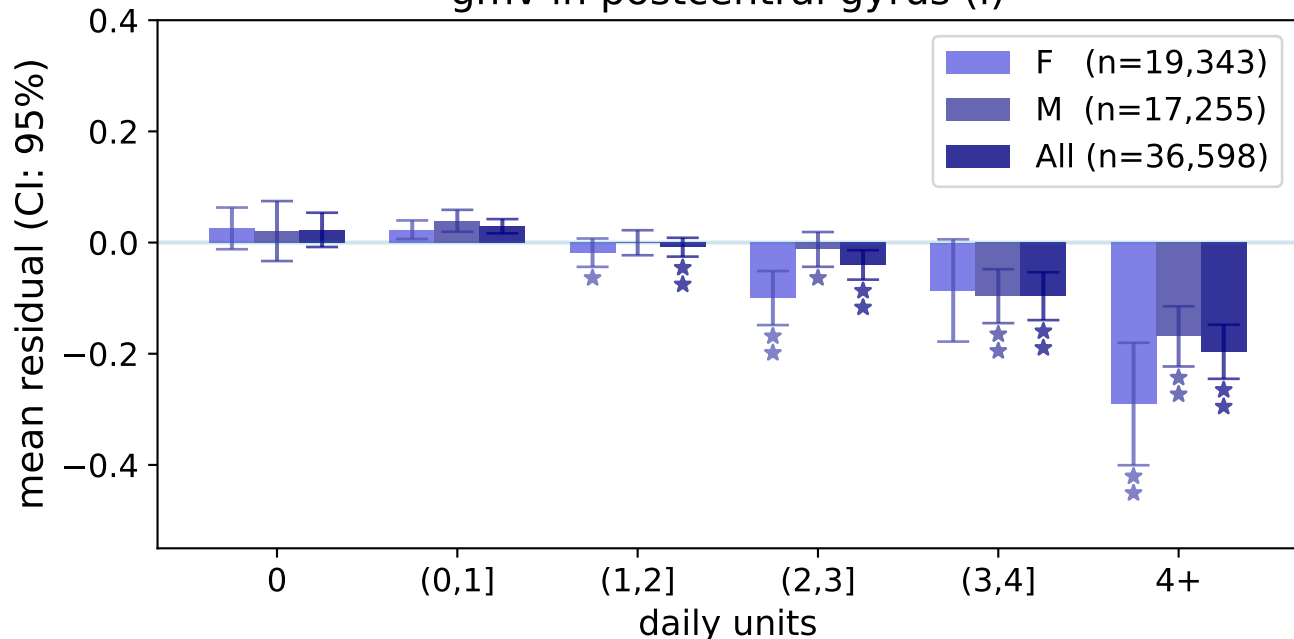

two-tailed test against [0,1] group: \*  $p < 0.01$ , \* \*  $p < 0.001$

# gmv in postcentral gyrus (r)

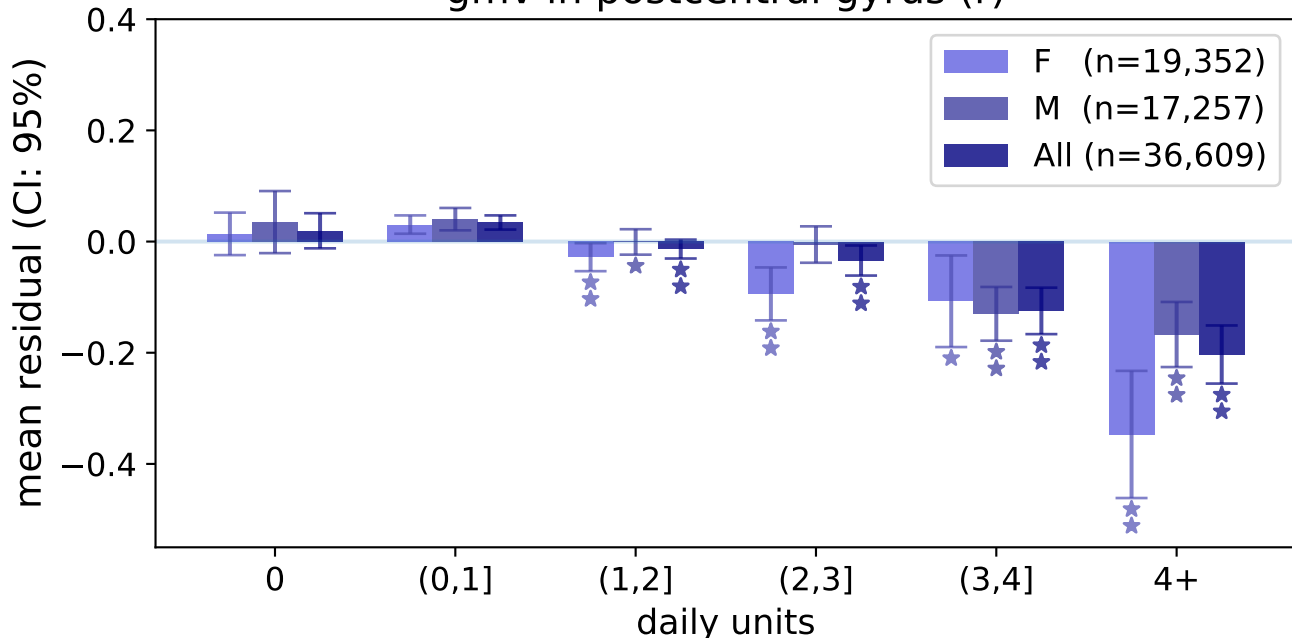

two-tailed test against [0,1] group: \*  $p < 0.01$ , \* \*  $p < 0.001$

# gmv in superior parietal lobule (I)

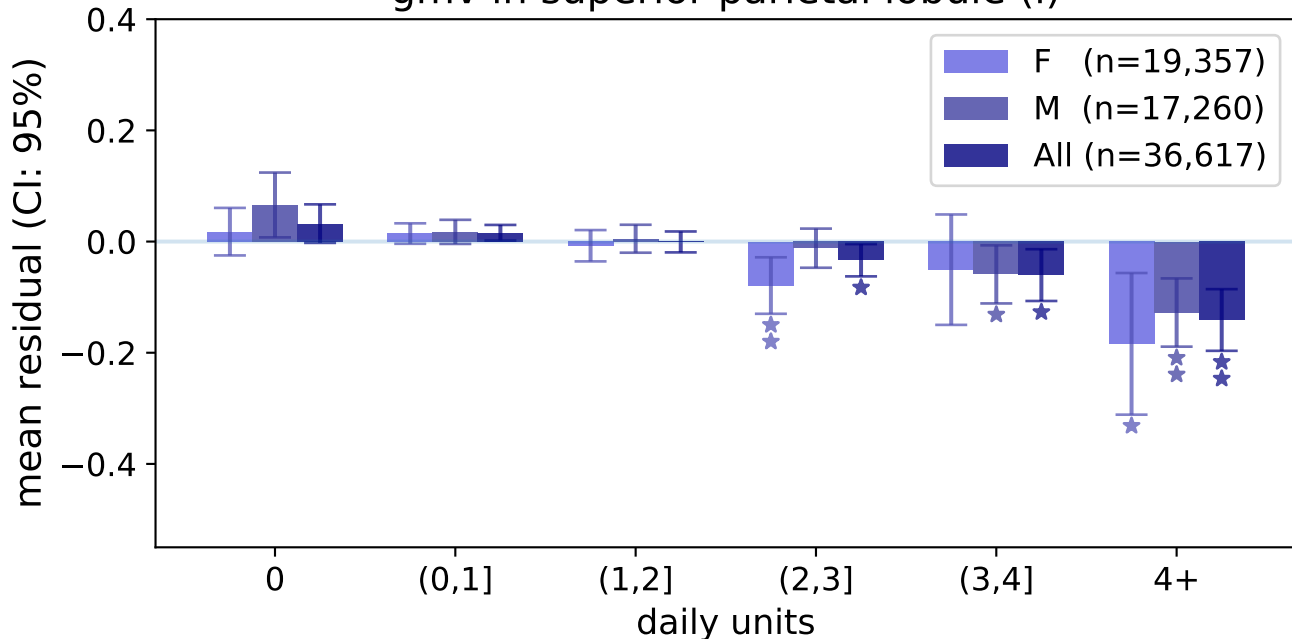

two-tailed test against [0,1] group: \* $p < 0.01$ , \*\* $p < 0.001$

# gmv in superior parietal lobule (r)

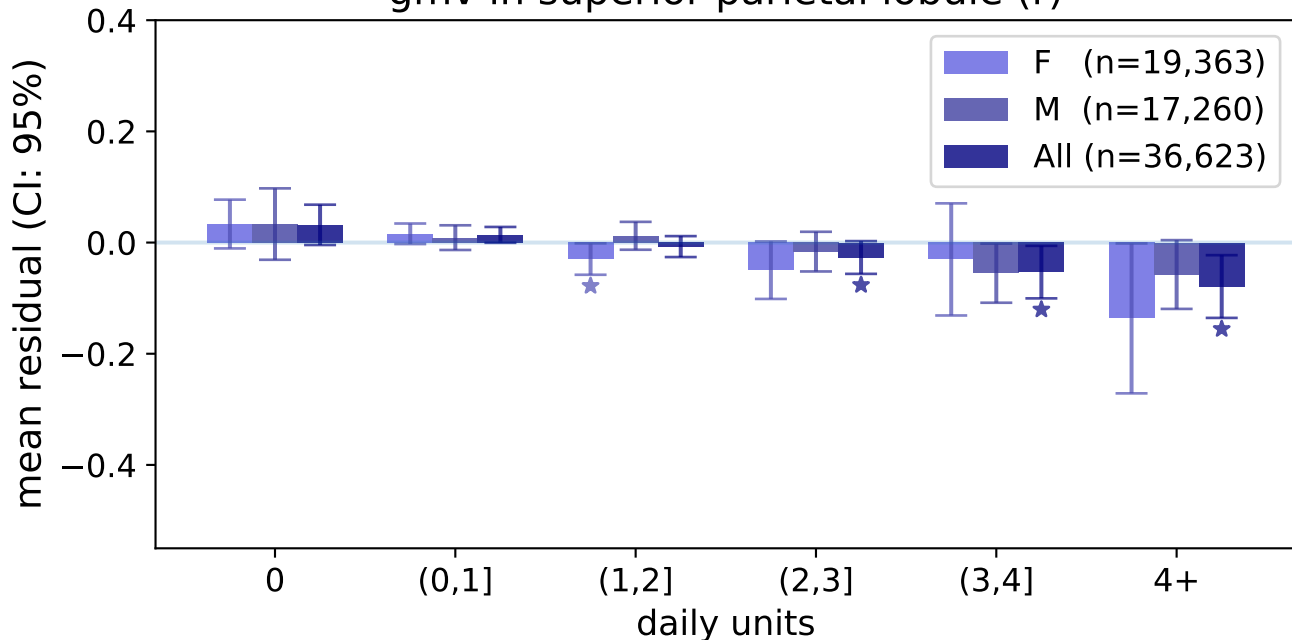

two-tailed test against [0,1] group: \* $p < 0.01$ , \*\* $p < 0.001$

# gmv in supramarginal gyrus, anterior division (I)

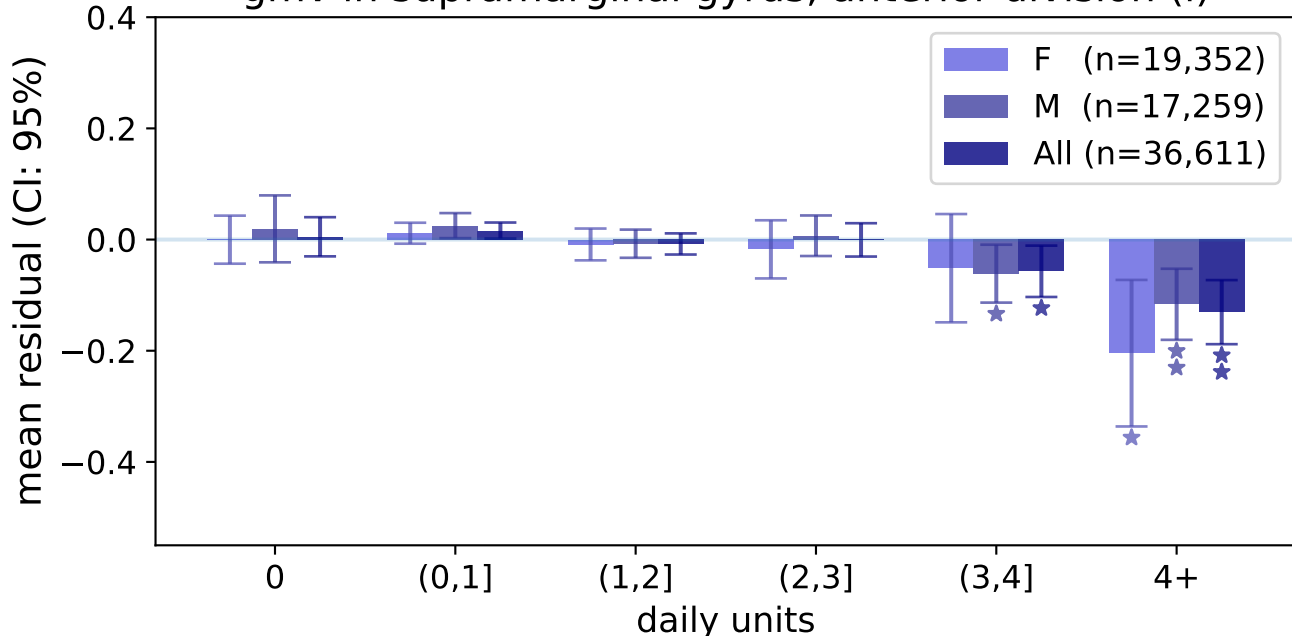

# gmv in supramarginal gyrus, anterior division (r)

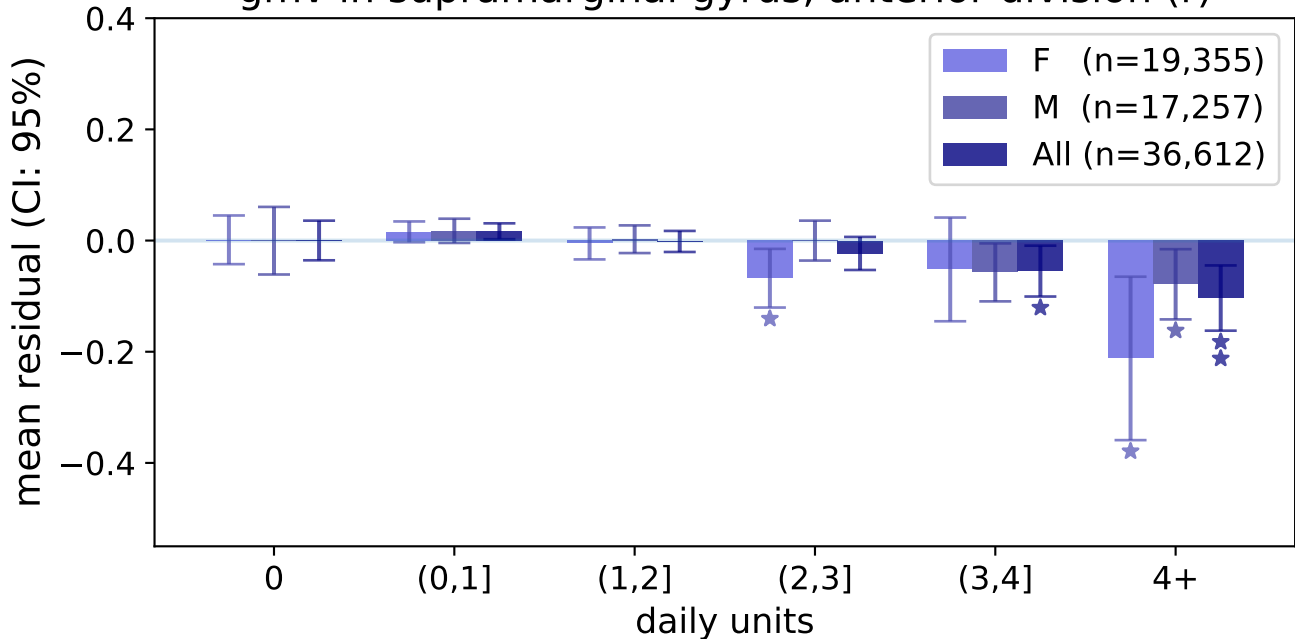

# gmv in supramarginal gyrus, posterior division (I)

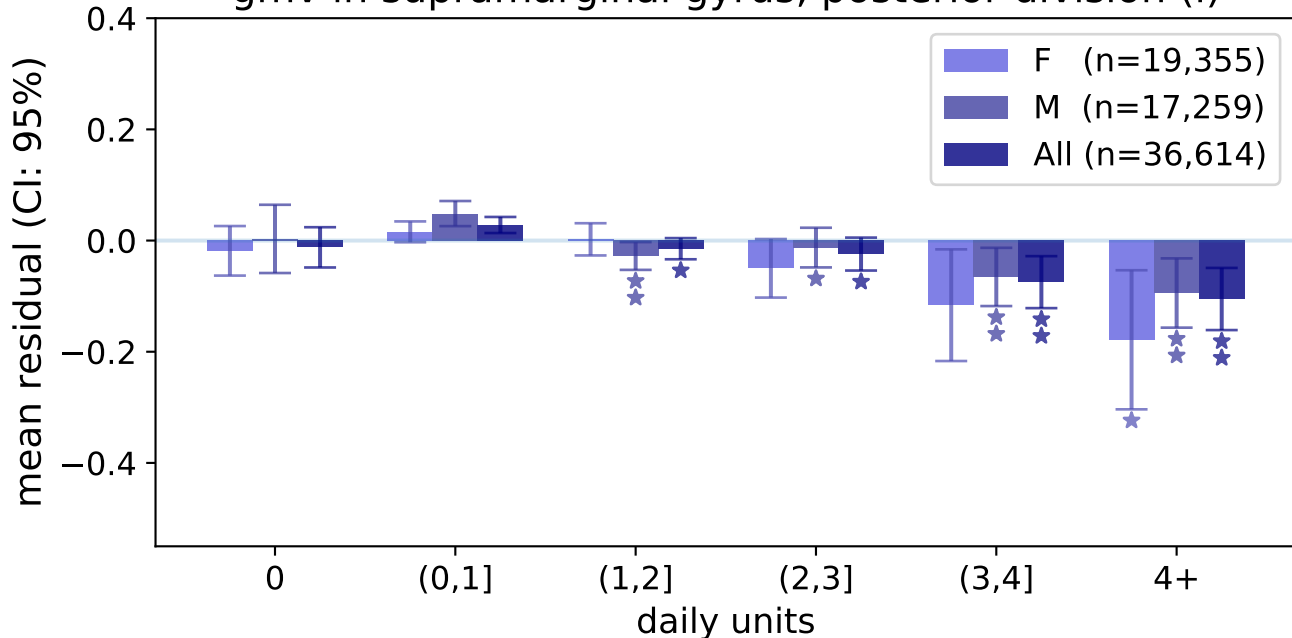

# gmv in supramarginal gyrus, posterior division (r)

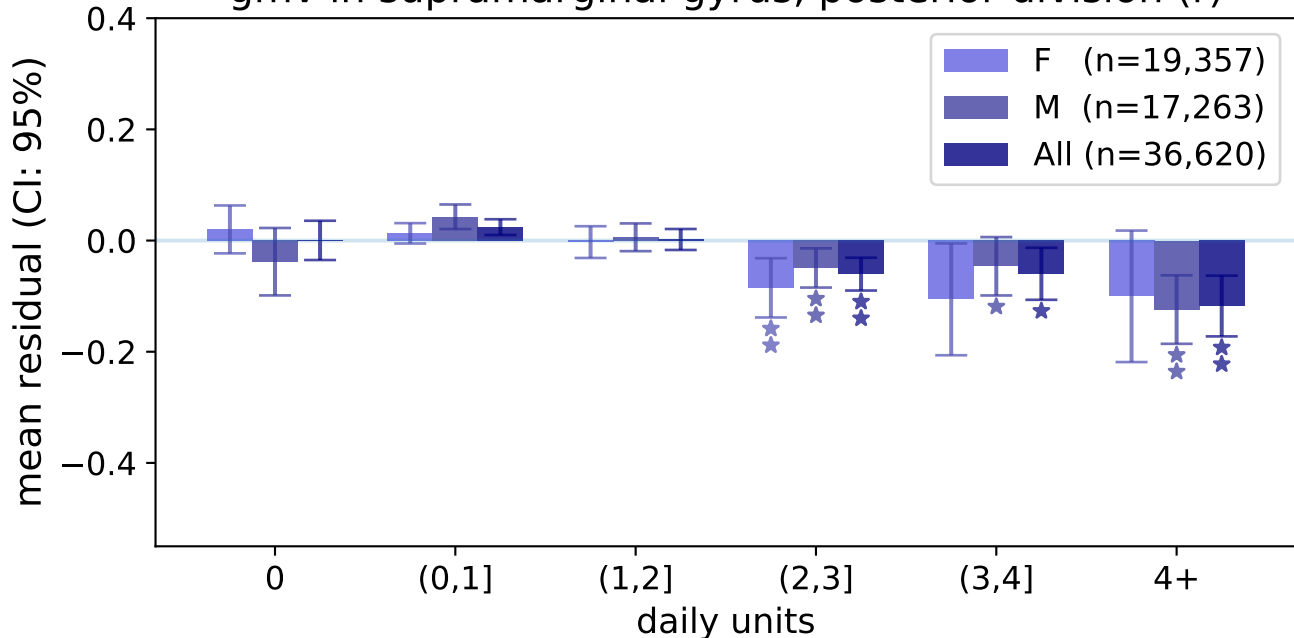

# gmv in angular gyrus (I)

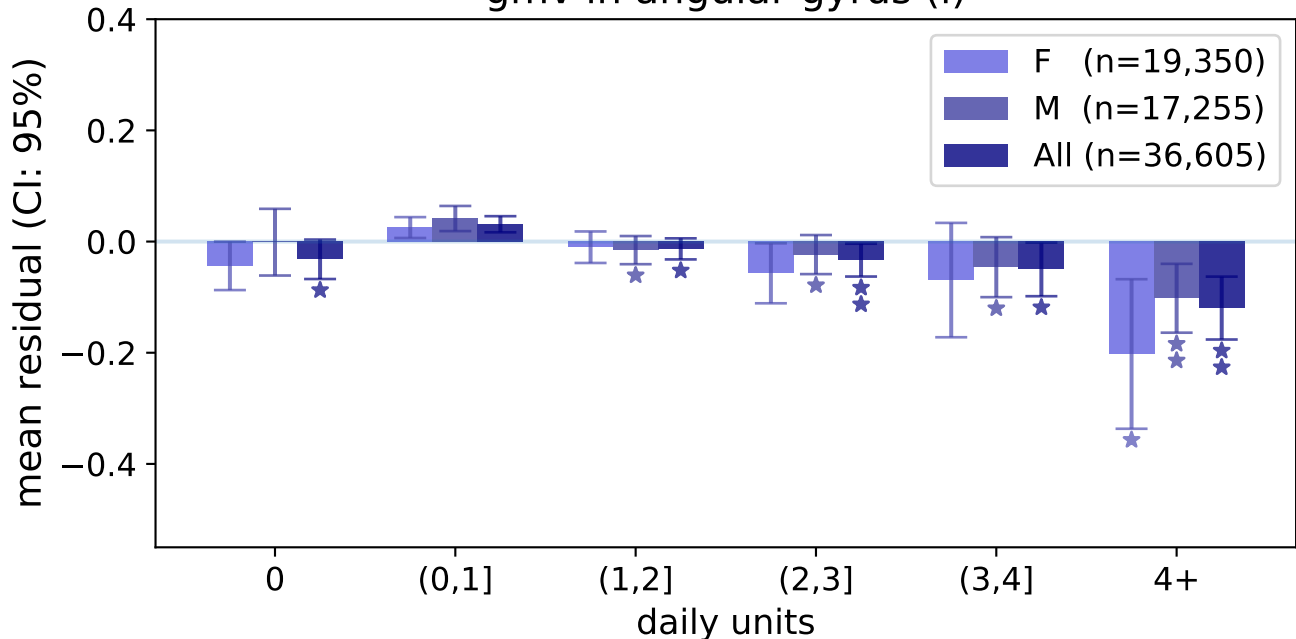

# gmv in angular gyrus (r)

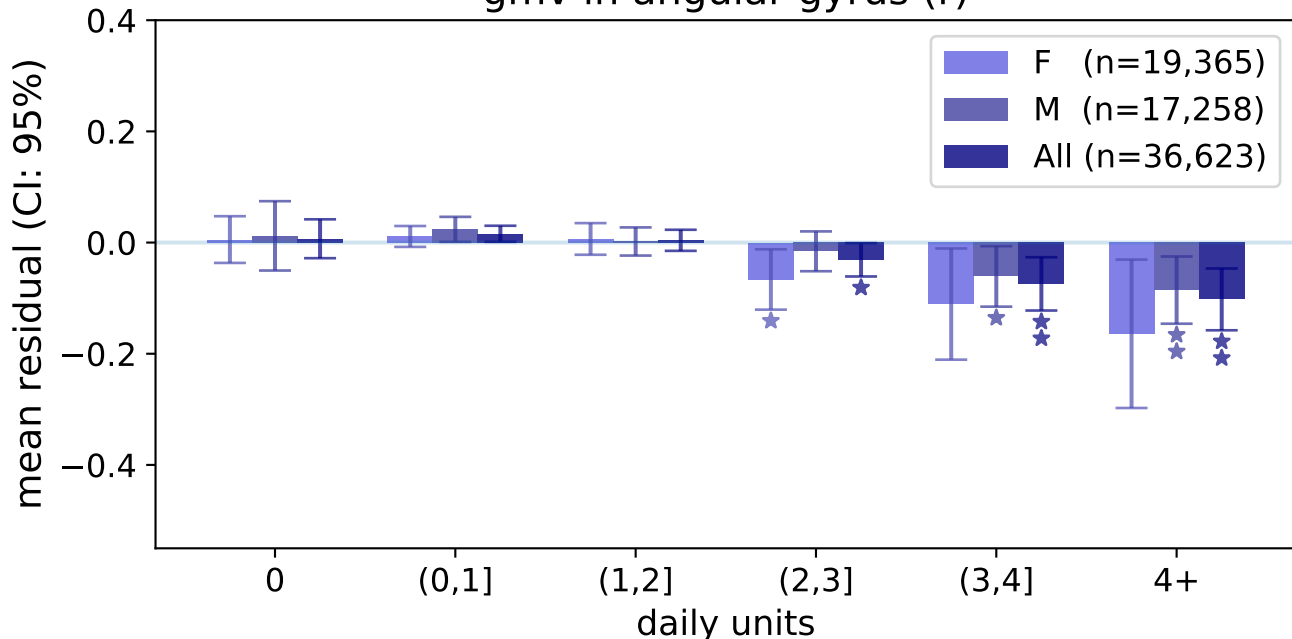

two-tailed test against [0,1] group: \*  $p < 0.01$ , \* \*  $p < 0.001$

# gmv in lateral occipital cortex, superior division (I)

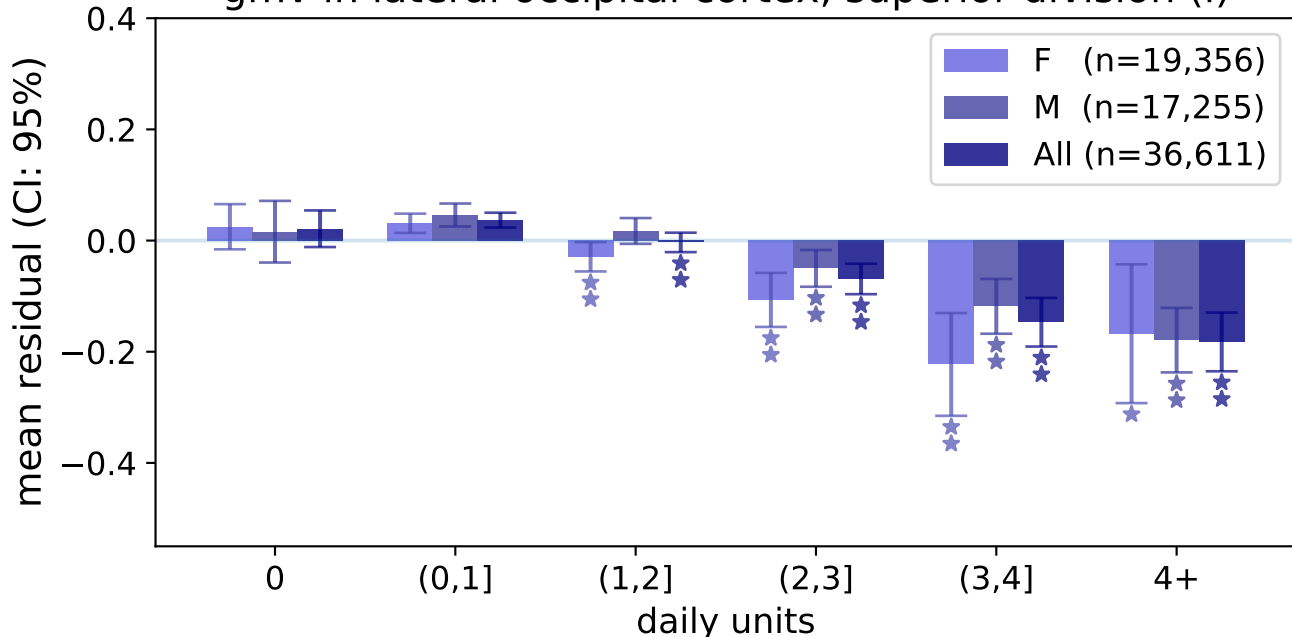

two-tailed test against [0,1] group: \*  $p < 0.01$ , \* \*  $p < 0.001$

# gmv in lateral occipital cortex, superior division (r)

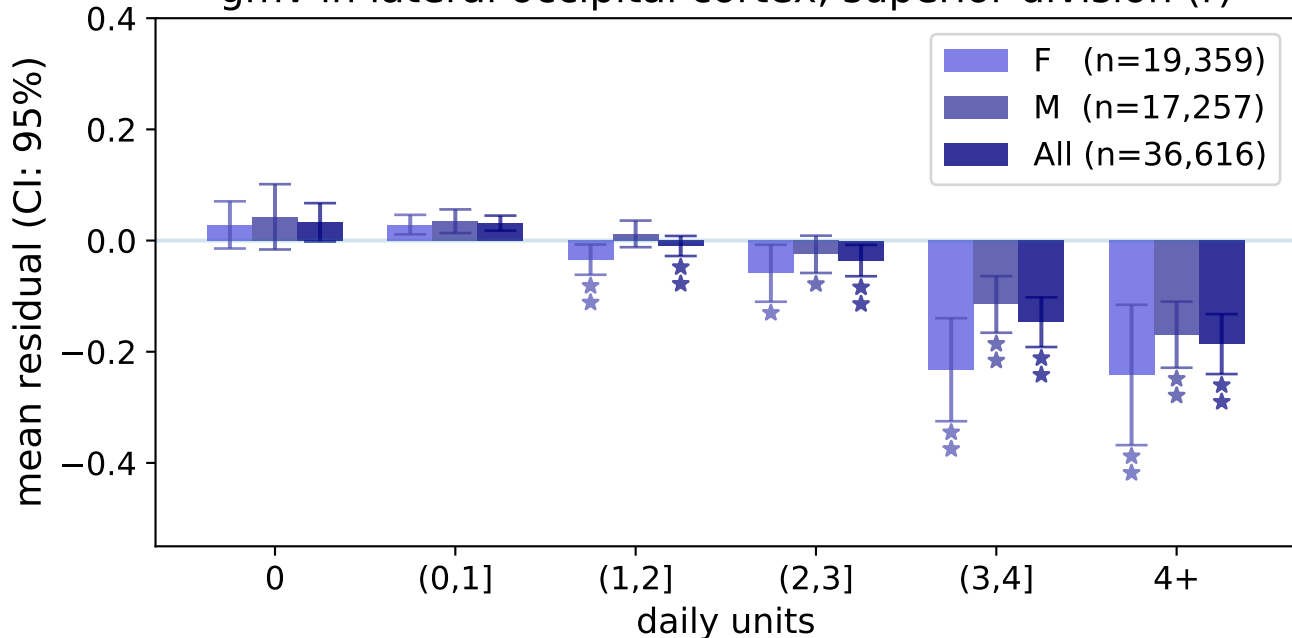

# gmv in lateral occipital cortex, inferior division (I)

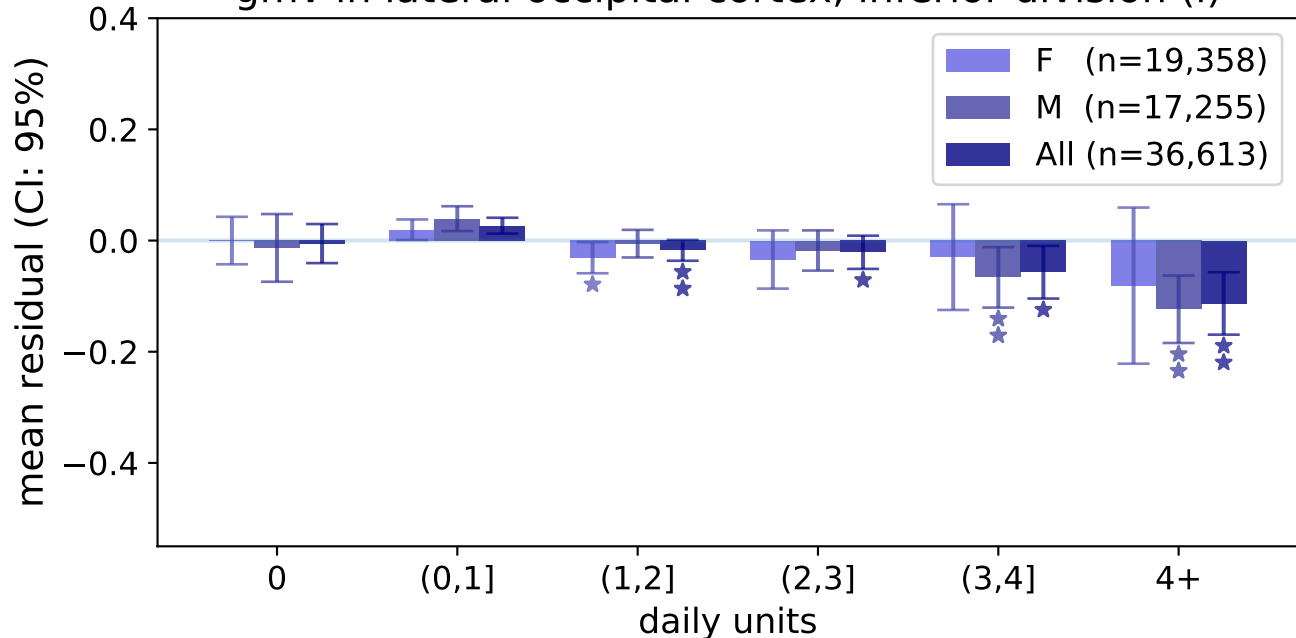

# gmv in lateral occipital cortex, inferior division (r)

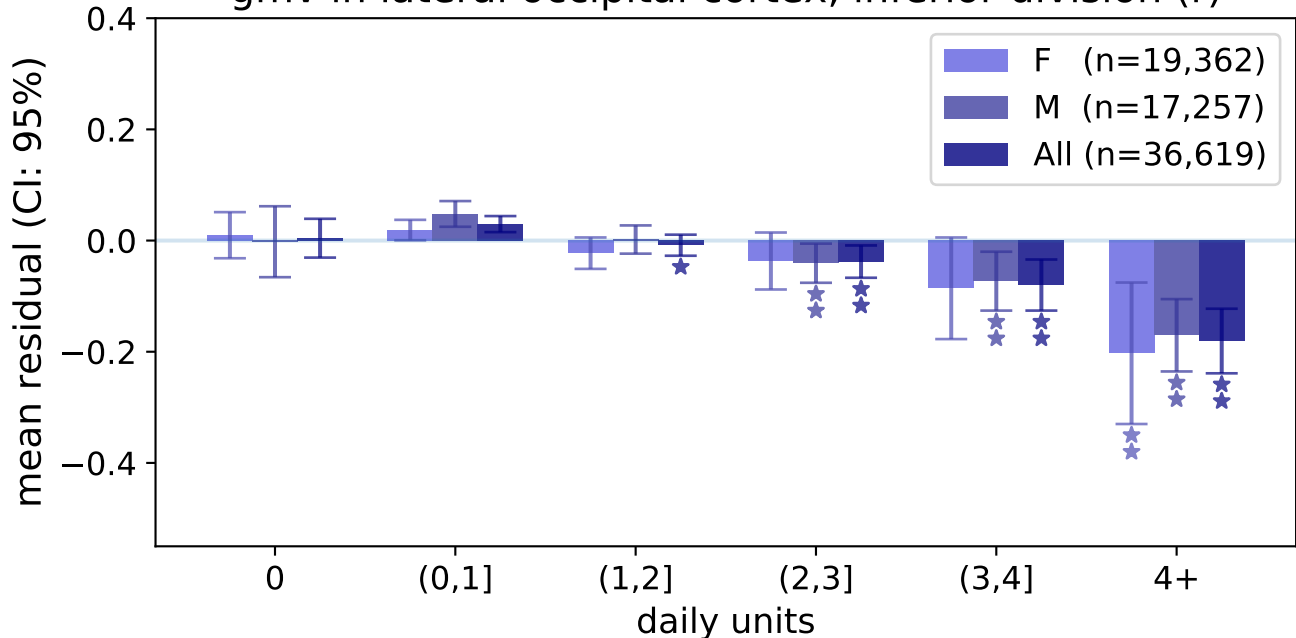

# gmv in intracalcarine cortex (I)

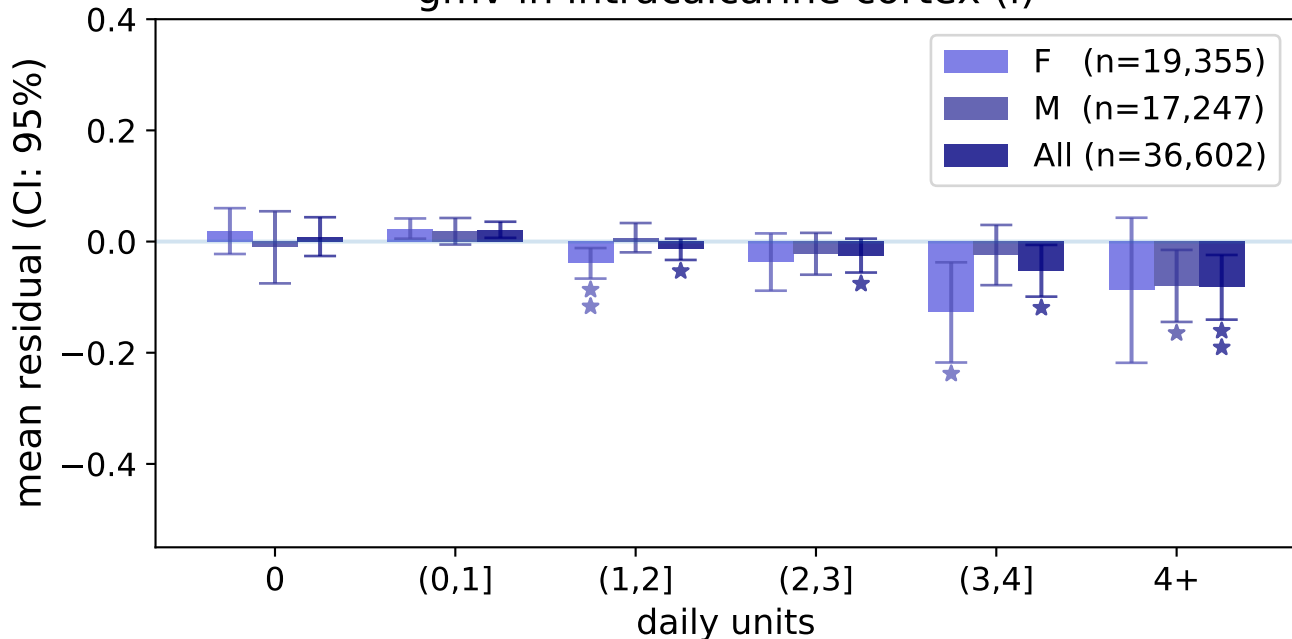

# gmv in intracalcarine cortex (r)

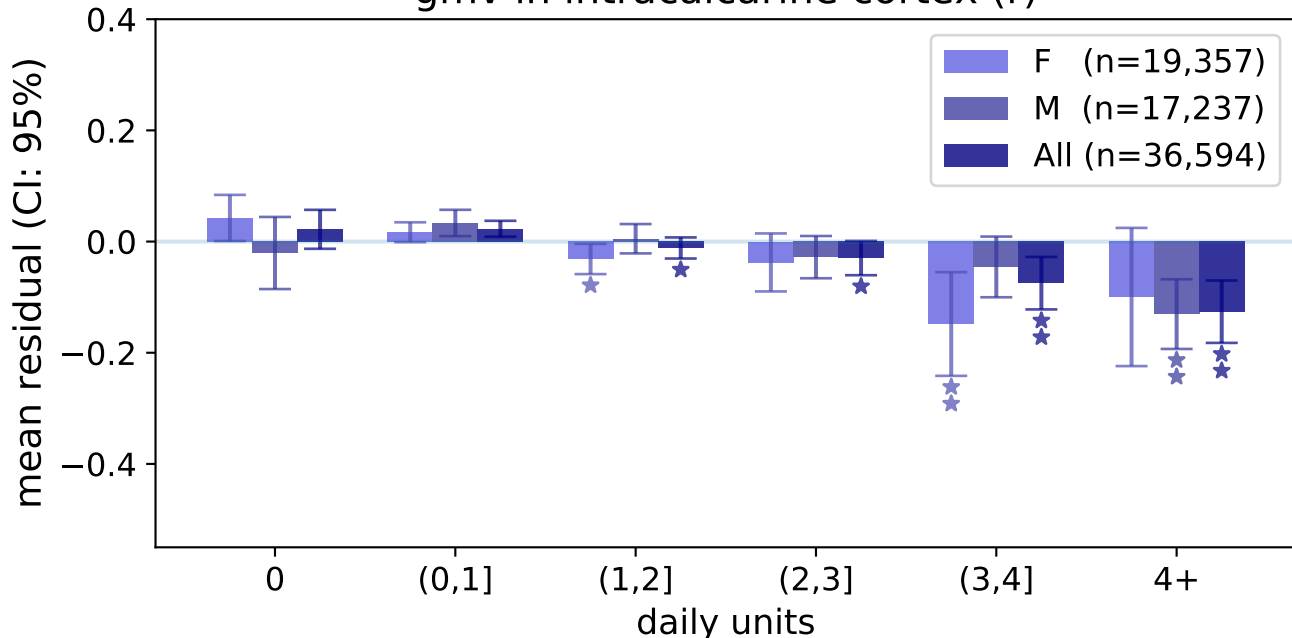

# gmv in frontal medial cortex (I)

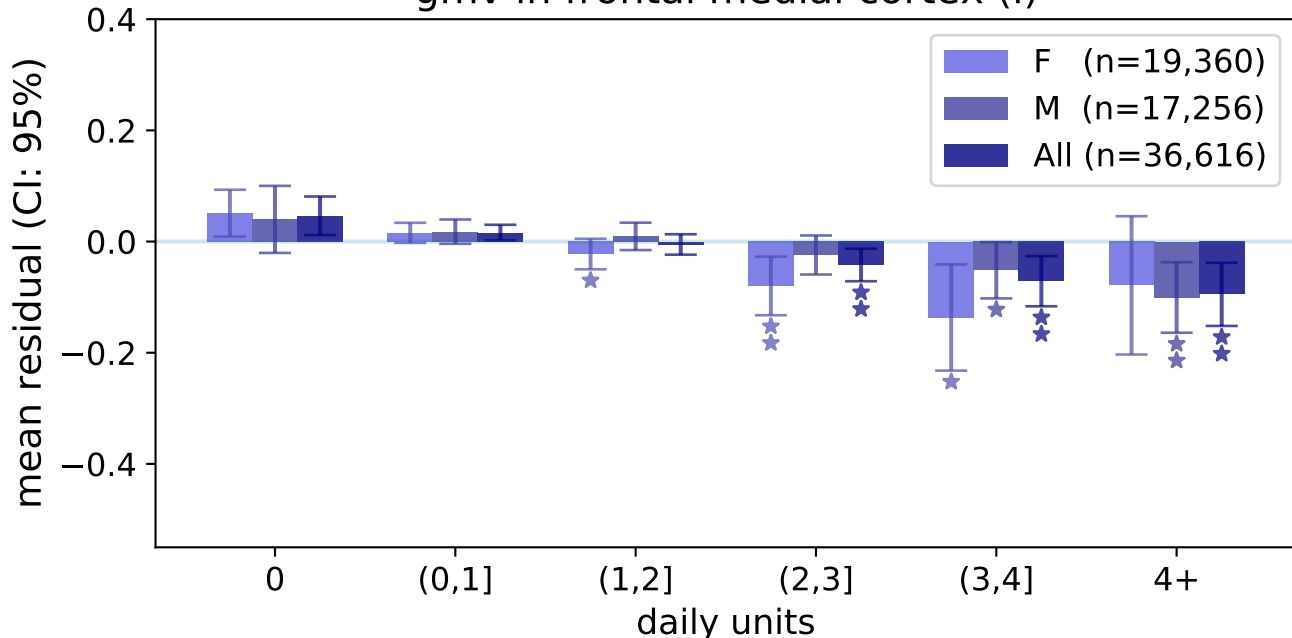

two-tailed test against [0,1] group: \*  $p < 0.01$ , \*\*  $p < 0.001$

# gmv in frontal medial cortex (r)

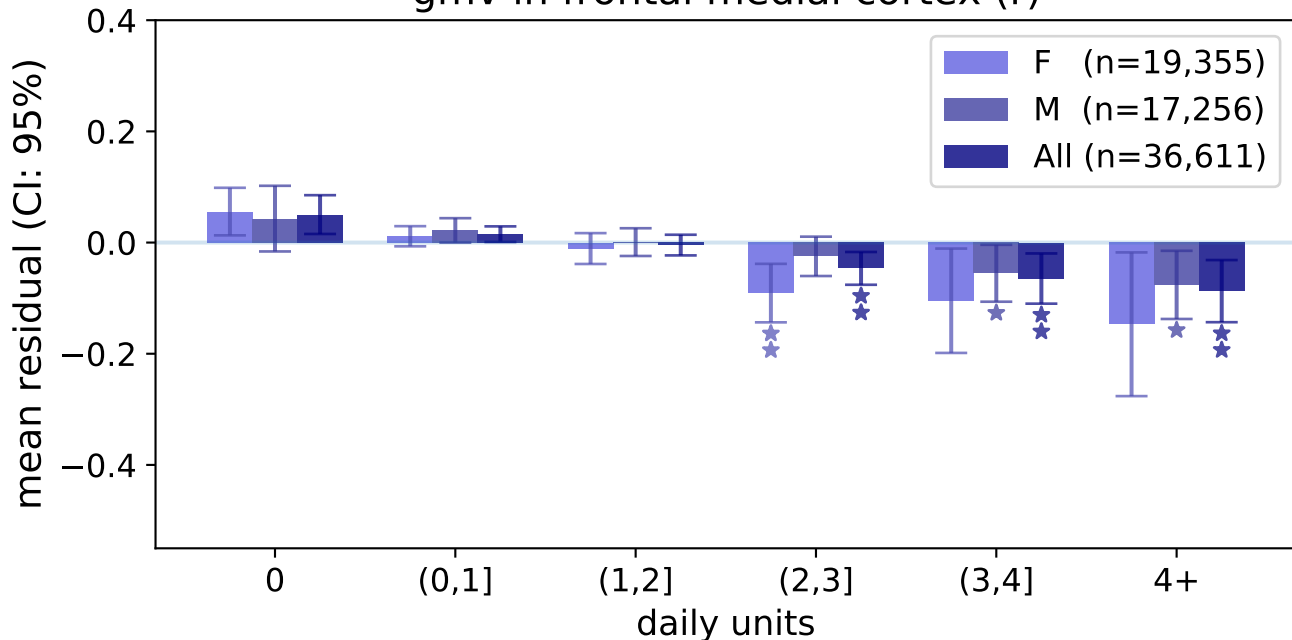

two-tailed test against [0,1] group: \* $p < 0.01$ , \*\* $p < 0.001$

# gmv in juxtapositional lobule cortex (I)

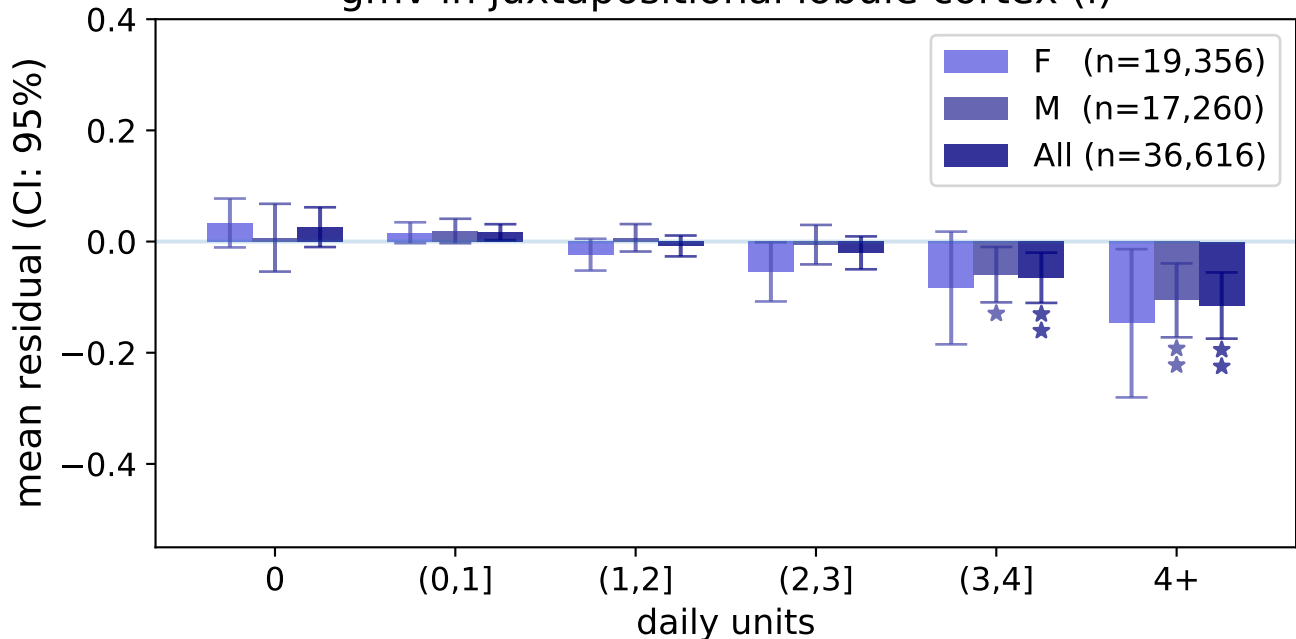

two-tailed test against [0,1] group: \* $p < 0.01$ , \*\* $p < 0.001$

# gmv in juxtapositional lobule cortex (r)

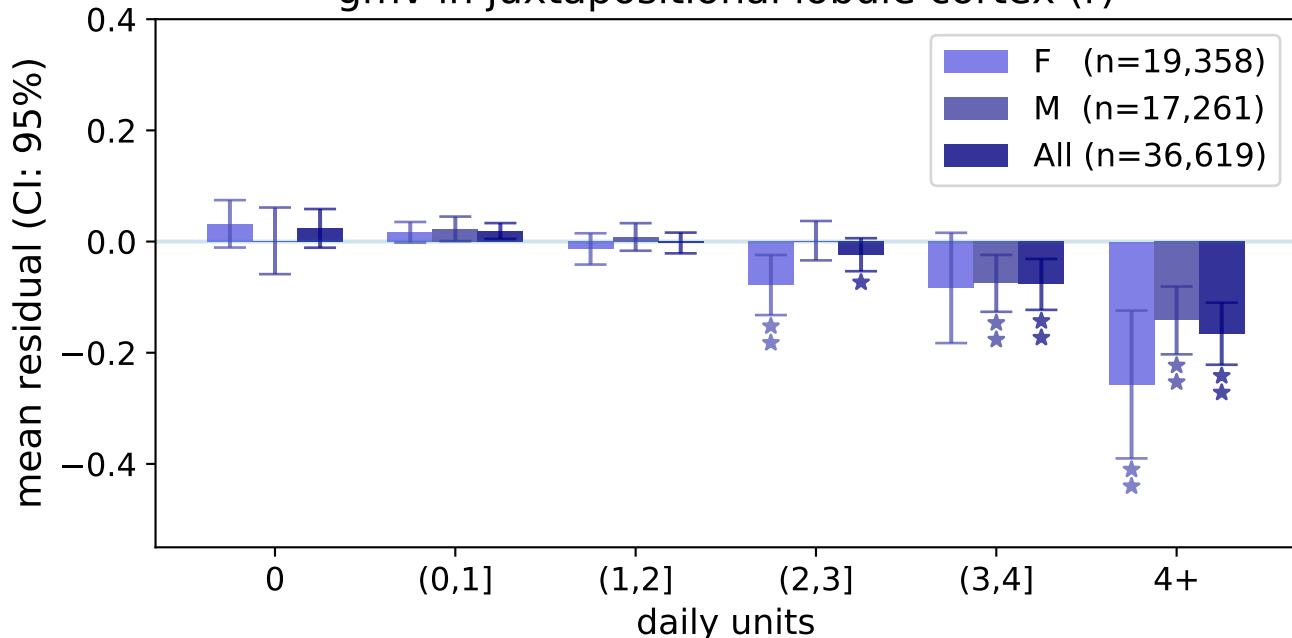

two-tailed test against [0,1] group: \* $p < 0.01$ , \*\* $p < 0.001$

# gmv in subcallosal cortex (I)

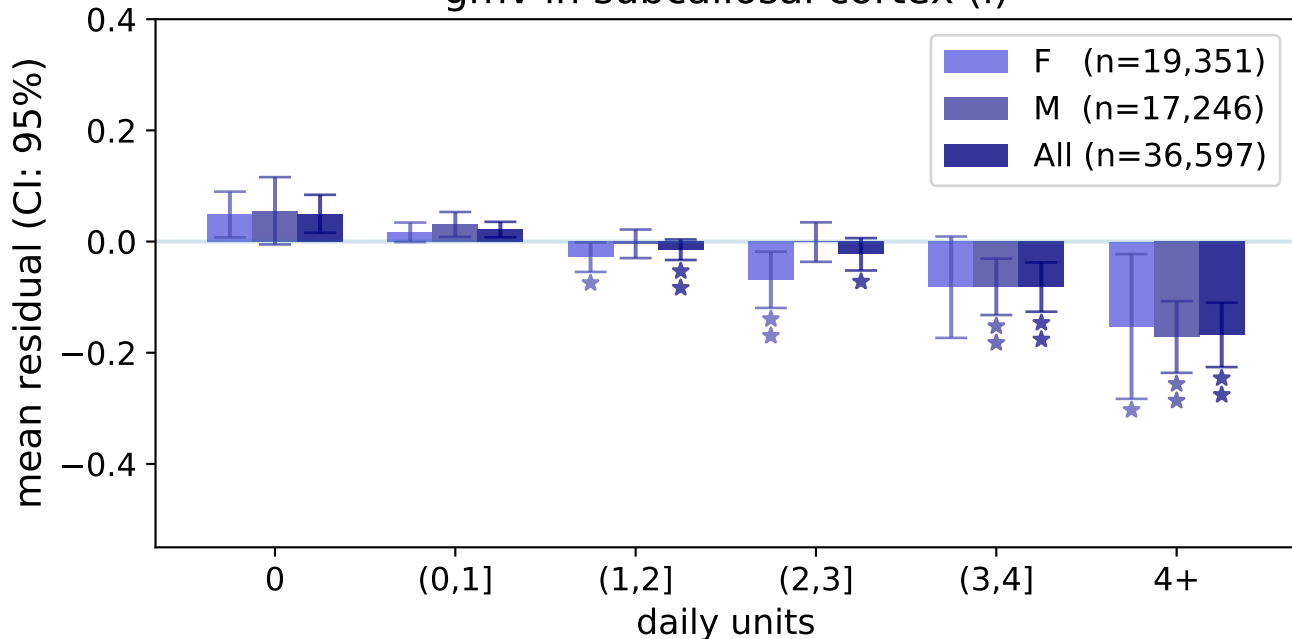

two-tailed test against [0,1] group: \* $p < 0.01$ , \*\* $p < 0.001$

# gmv in subcallosal cortex (r)

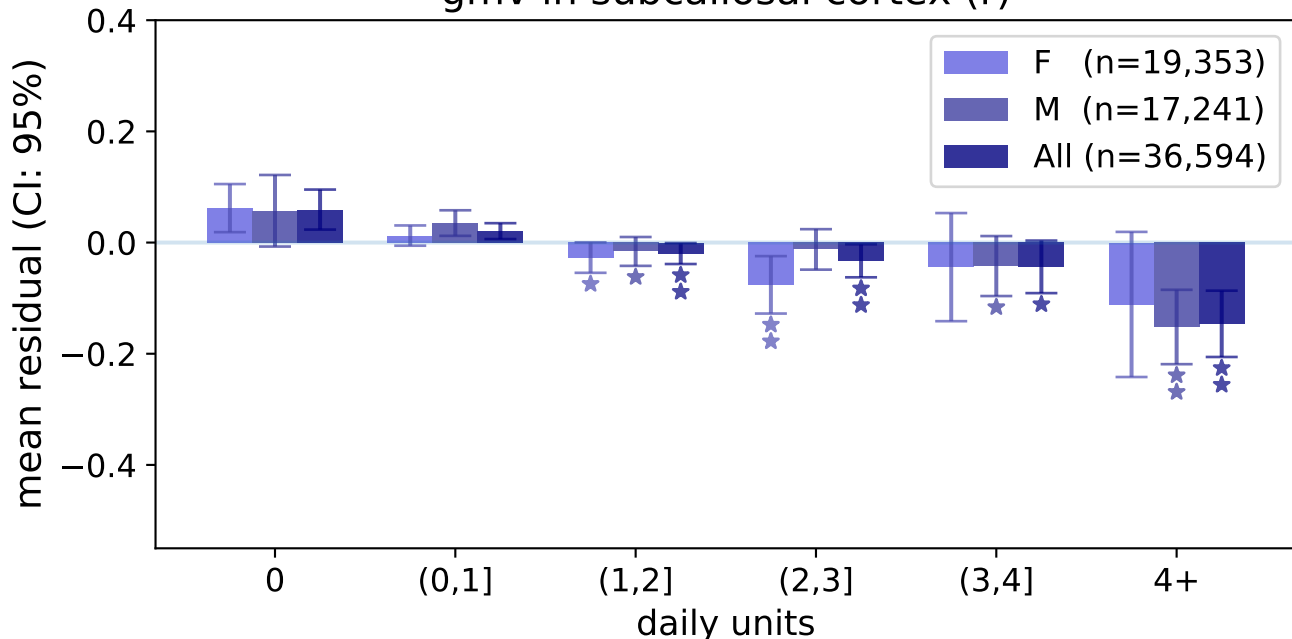

two-tailed test against [0,1] group: \* $p < 0.01$ , \*\* $p < 0.001$

# gmv in paracingulate gyrus (I)

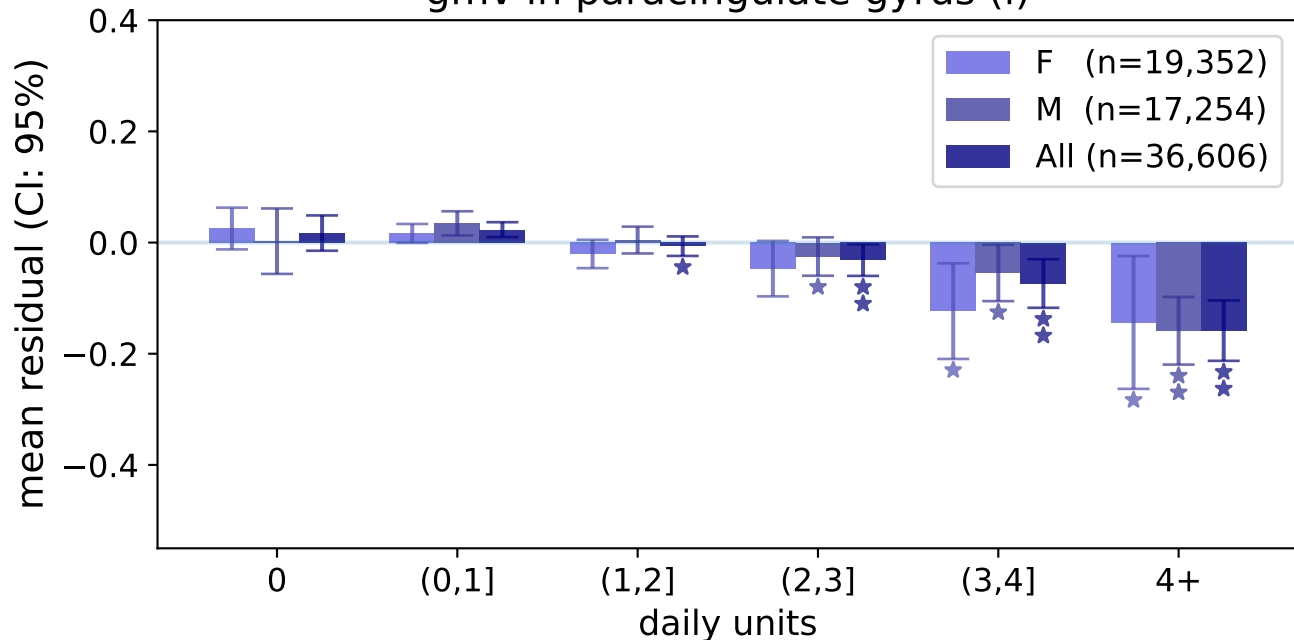

# gmv in paracingulate gyrus (r)

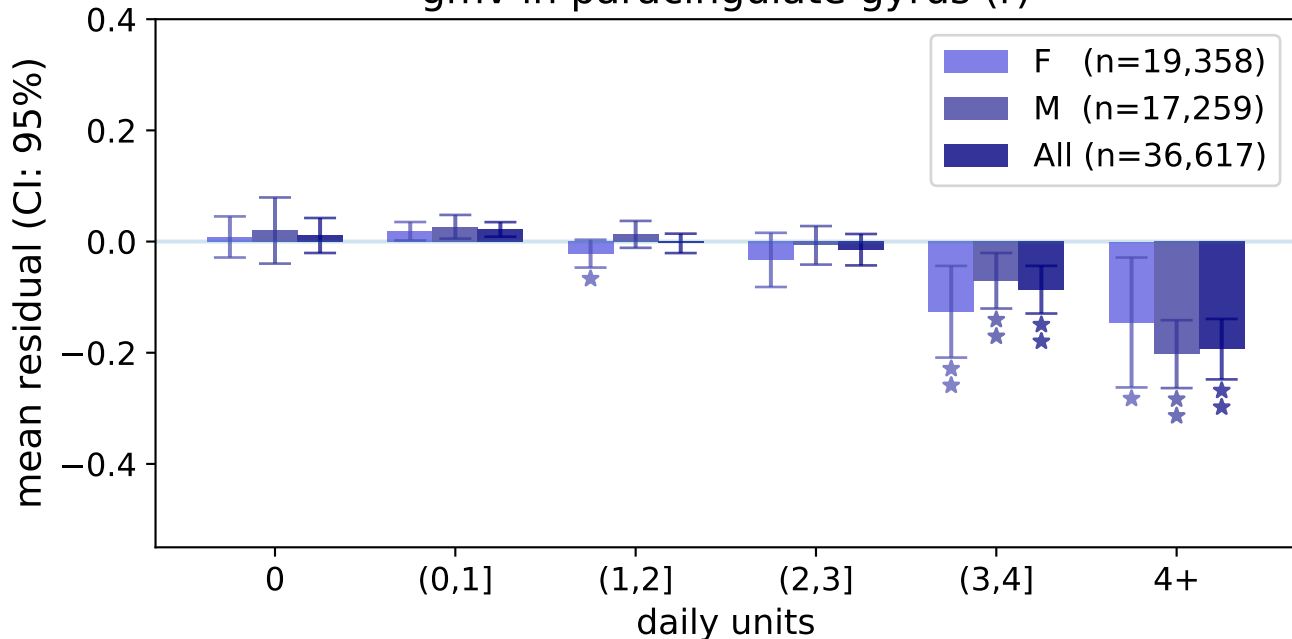

two-tailed test against [0,1] group: \* $p < 0.01$ , \* \*  $p < 0.001$

# gmv in cingulate gyrus, anterior division (I)

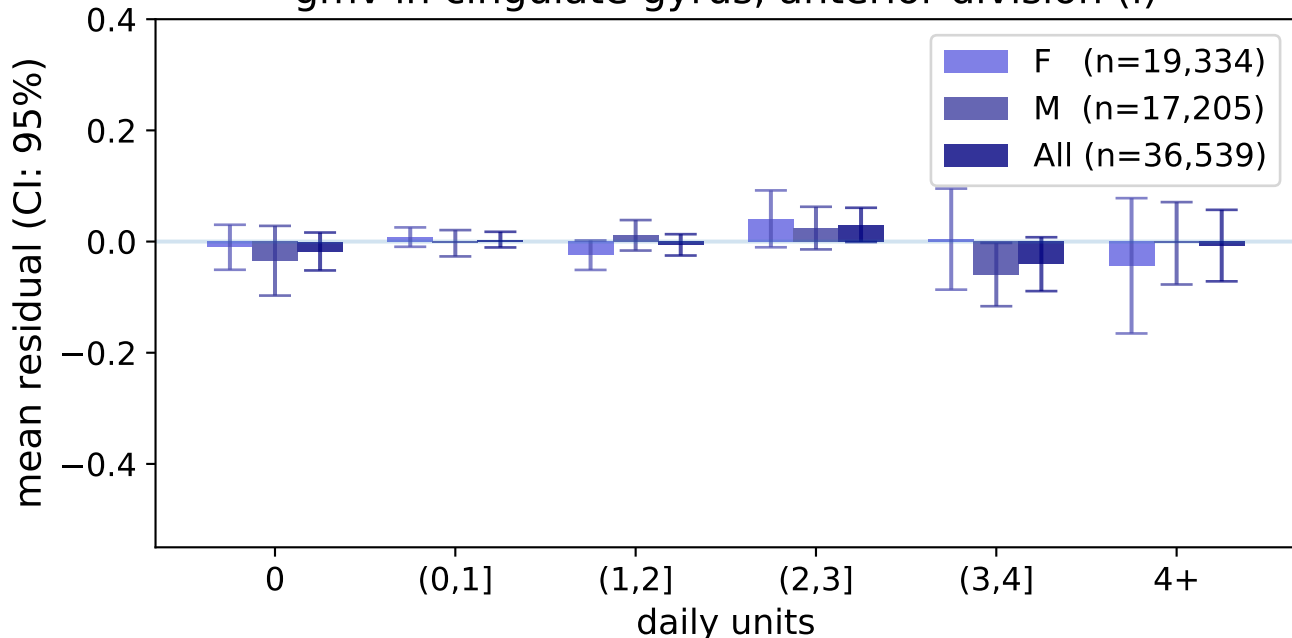

two-tailed test against [0,1] group: \* $p < 0.01$ , \*\* $p < 0.001$

# gmv in cingulate gyrus, anterior division (r)

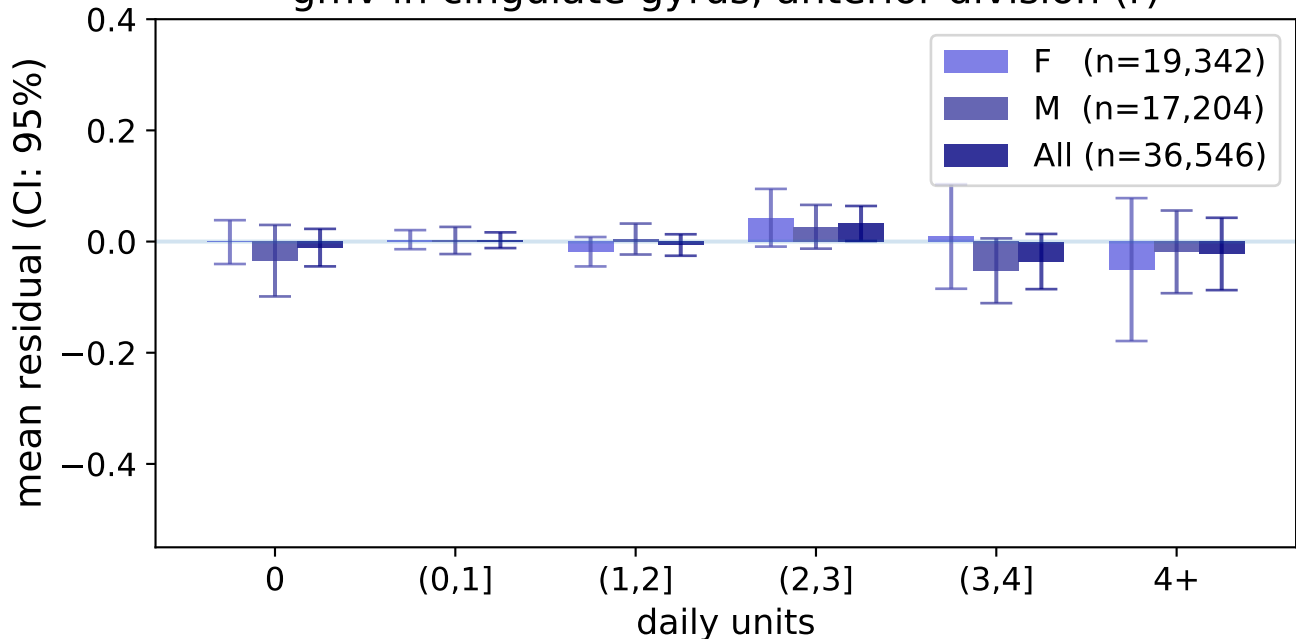

two-tailed test against [0,1] group: \*  $p < 0.01$ , \* \*  $p < 0.001$

# gmv in cingulate gyrus, posterior division (I)

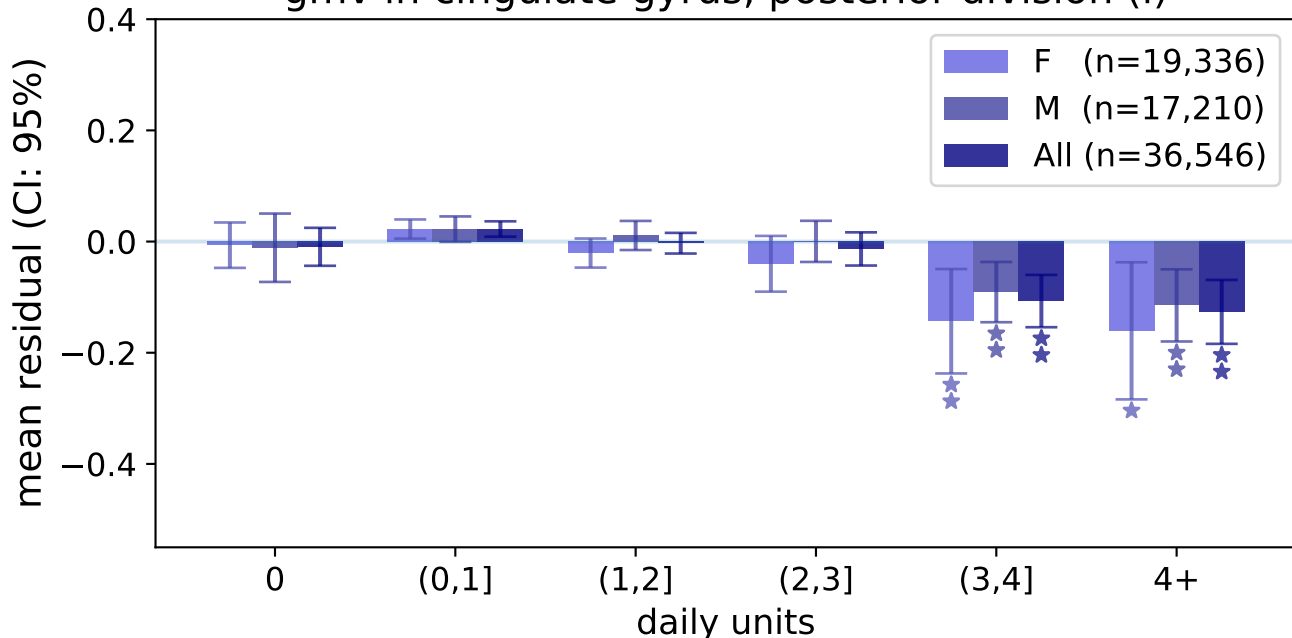

two-tailed test against [0,1] group: \* $p < 0.01$ , \* \*  $p < 0.001$

# gmv in cingulate gyrus, posterior division (r)

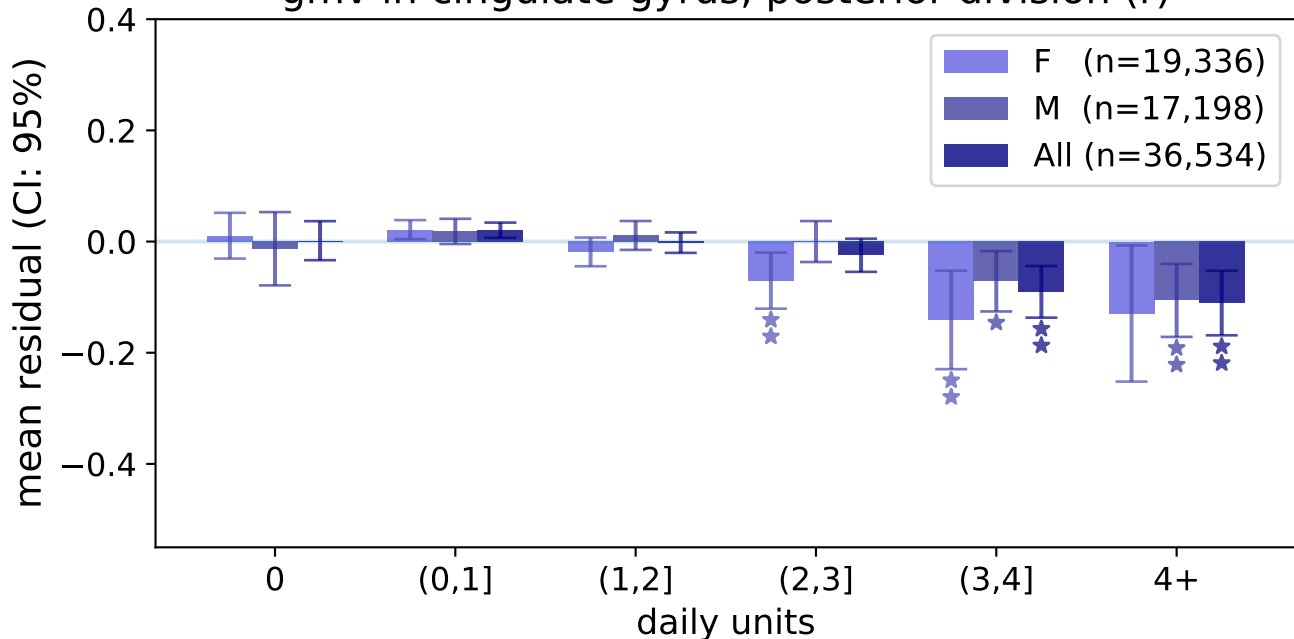

# gmv in precuneous cortex (I)

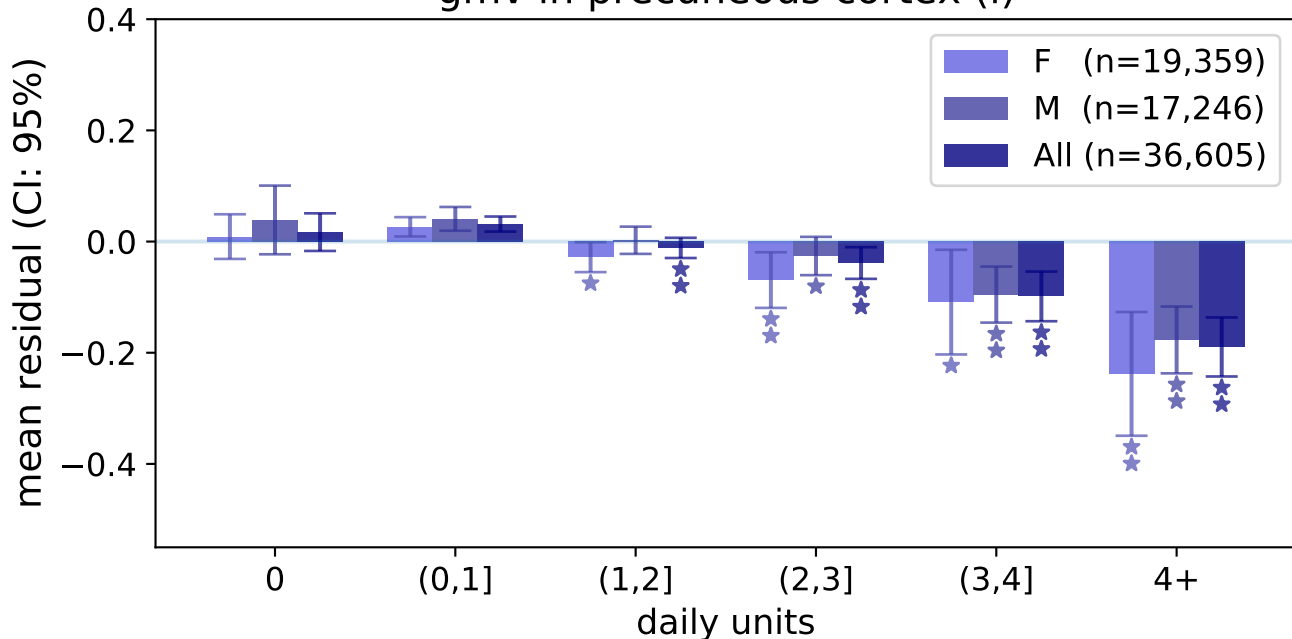

two-tailed test against [0,1] group: \*  $p < 0.01$ , \* \*  $p < 0.001$

# gmv in precuneous cortex (r)

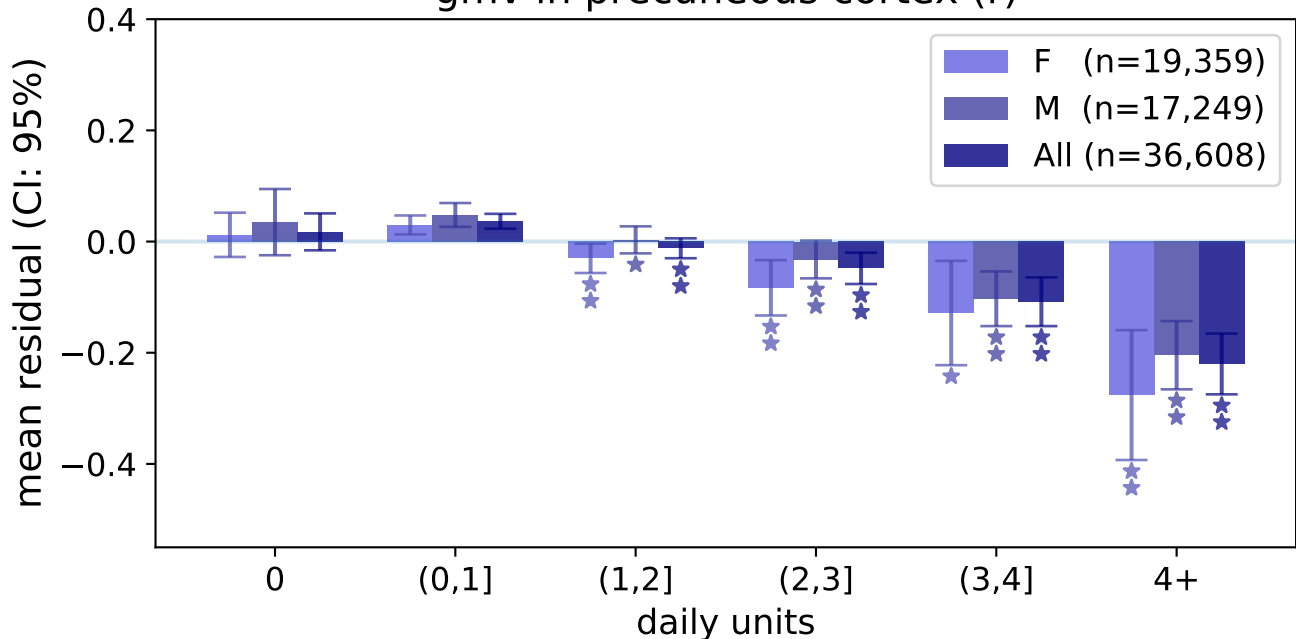

two-tailed test against [0,1] group: \*  $p < 0.01$ , \* \*  $p < 0.001$

# gmv in cuneal cortex (I)

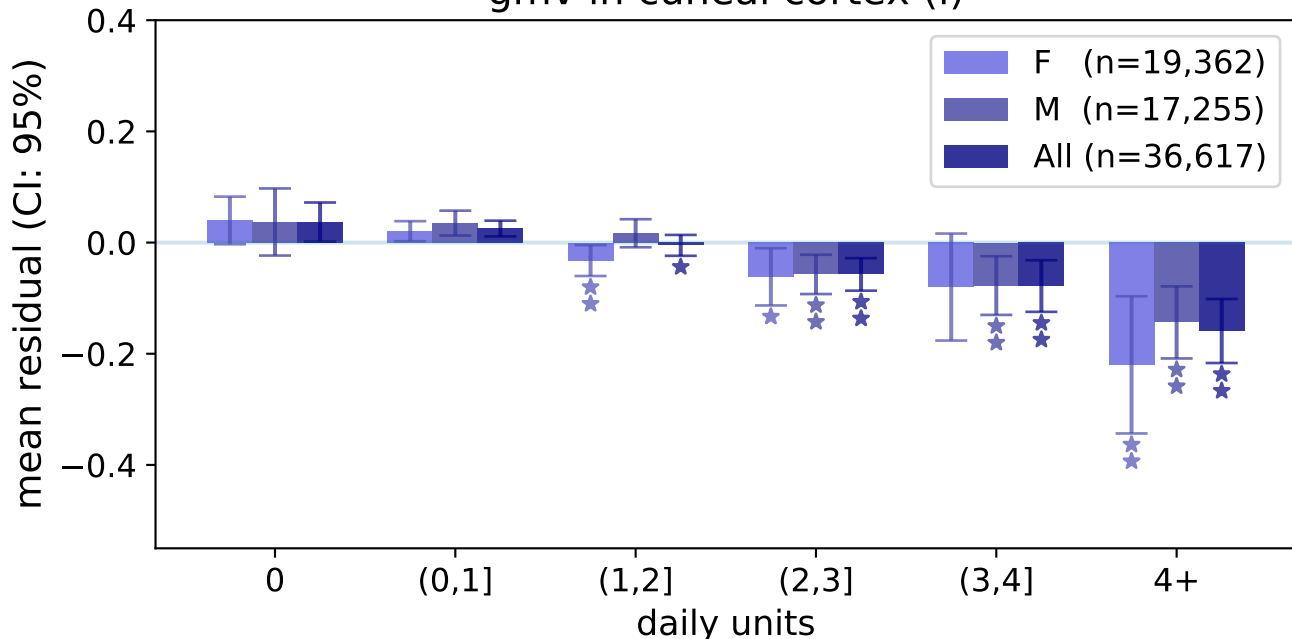

two-tailed test against [0,1] group: \* $p < 0.01$ , \*\* $p < 0.001$

# gmv in cuneal cortex (r)

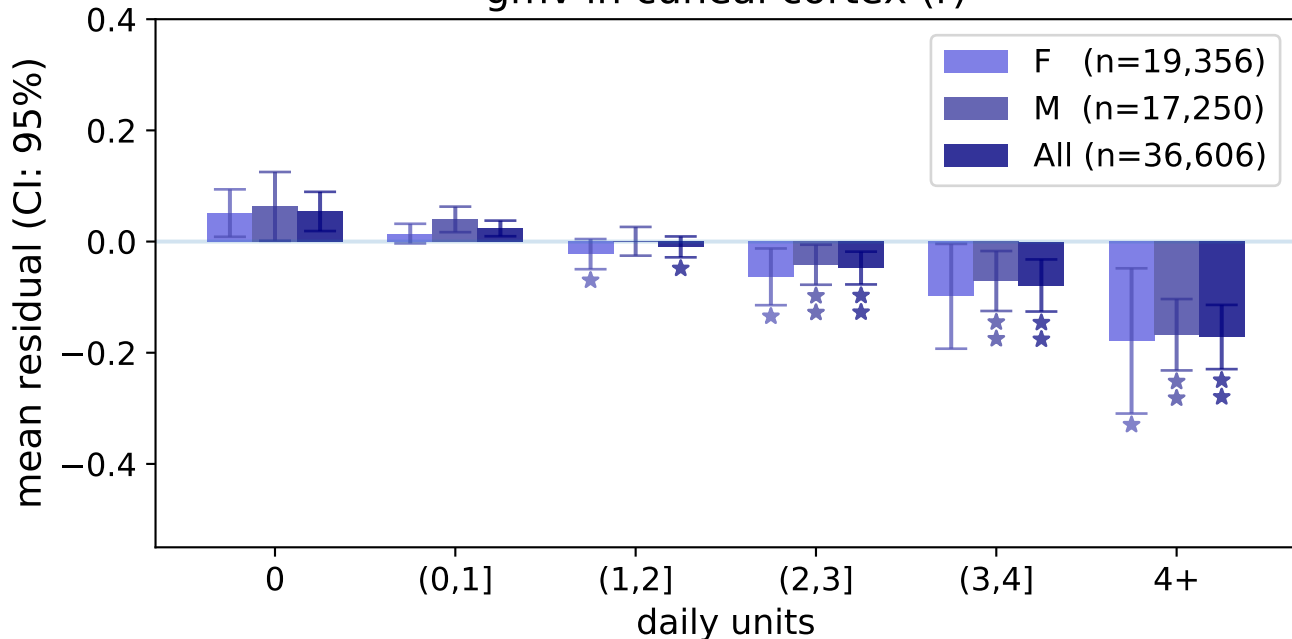

two-tailed test against [0,1] group: \*  $p < 0.01$ , \* \*  $p < 0.001$

# gmv in frontal orbital cortex (I)

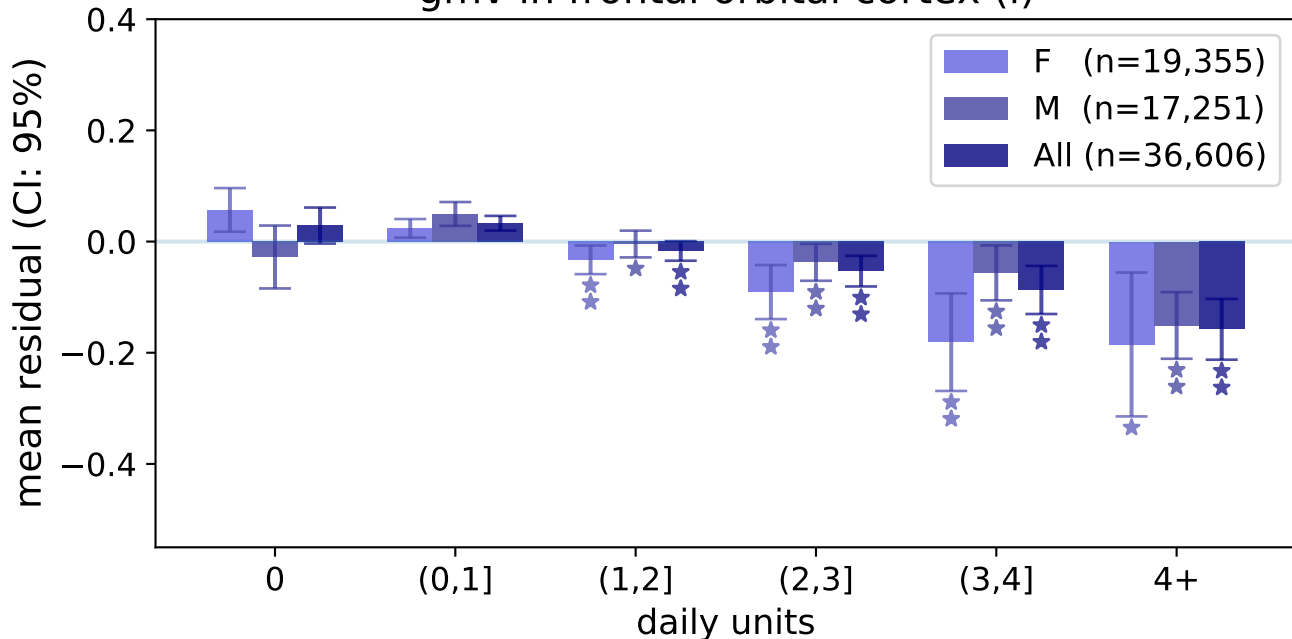

two-tailed test against [0,1] group: \*  $p < 0.01$ , \* \*  $p < 0.001$

# gmv in frontal orbital cortex (r)

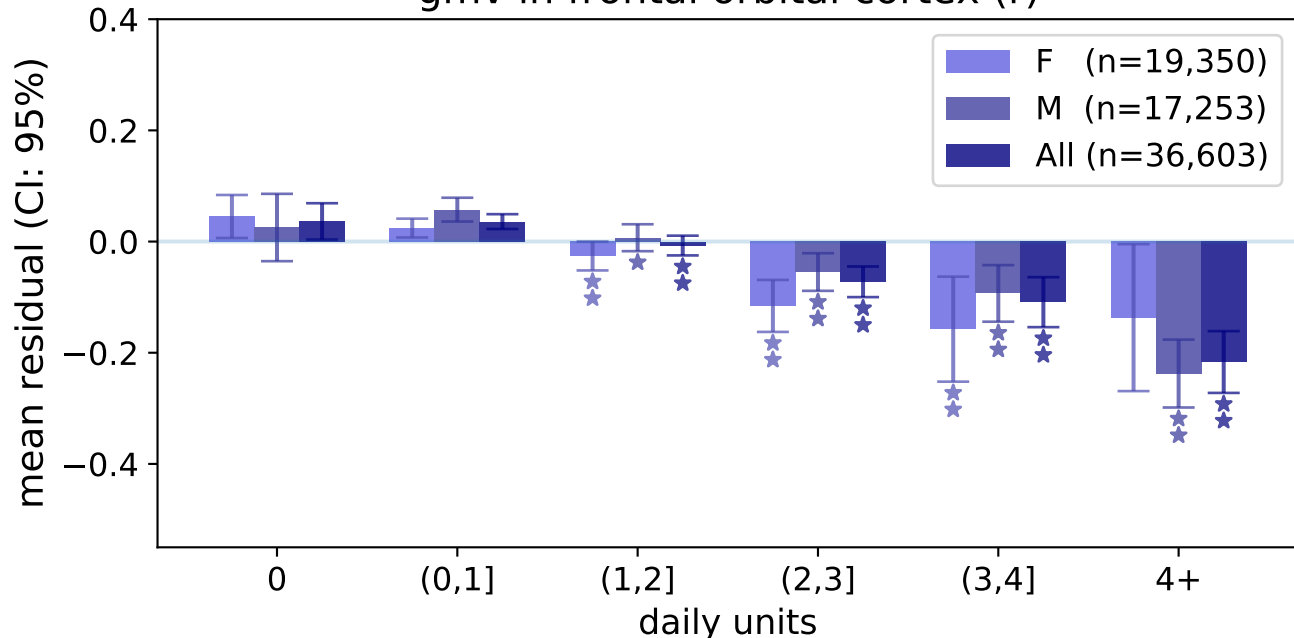

two-tailed test against [0,1] group: \*  $p < 0.01$ , \* \*  $p < 0.001$

# gmv in parahippocampal gyrus, anterior division (I)

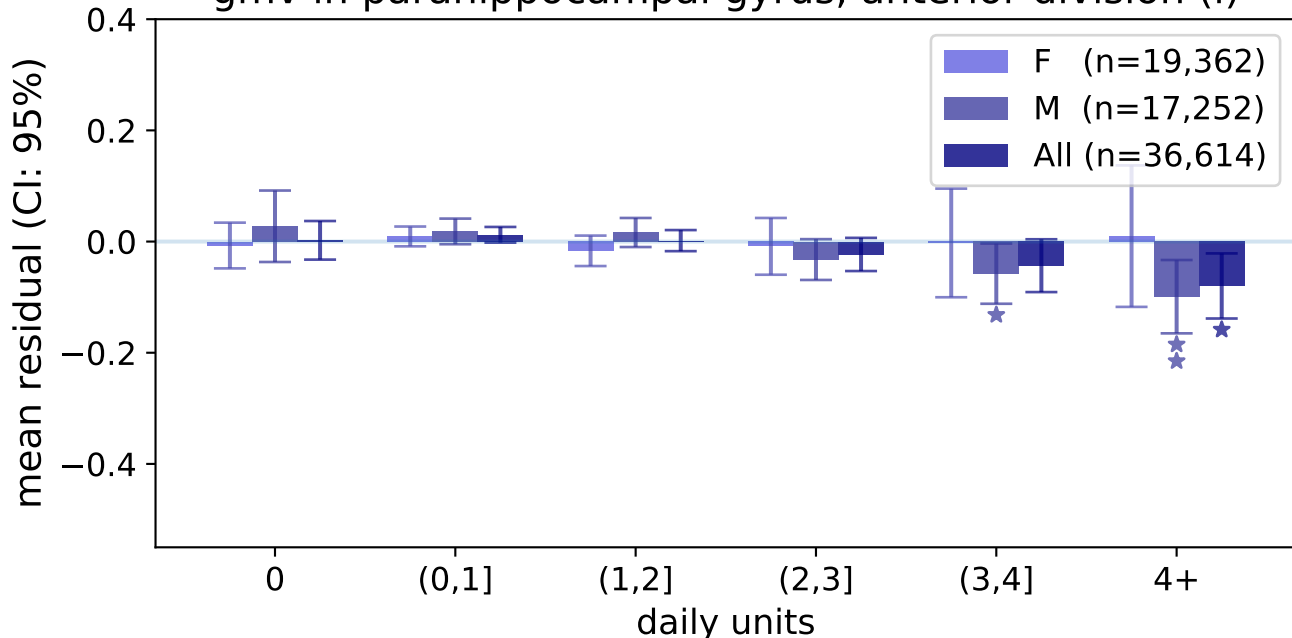

two-tailed test against [0,1] group: \* $p < 0.01$ , \*\* $p < 0.001$

# gmv in parahippocampal gyrus, anterior division (r)

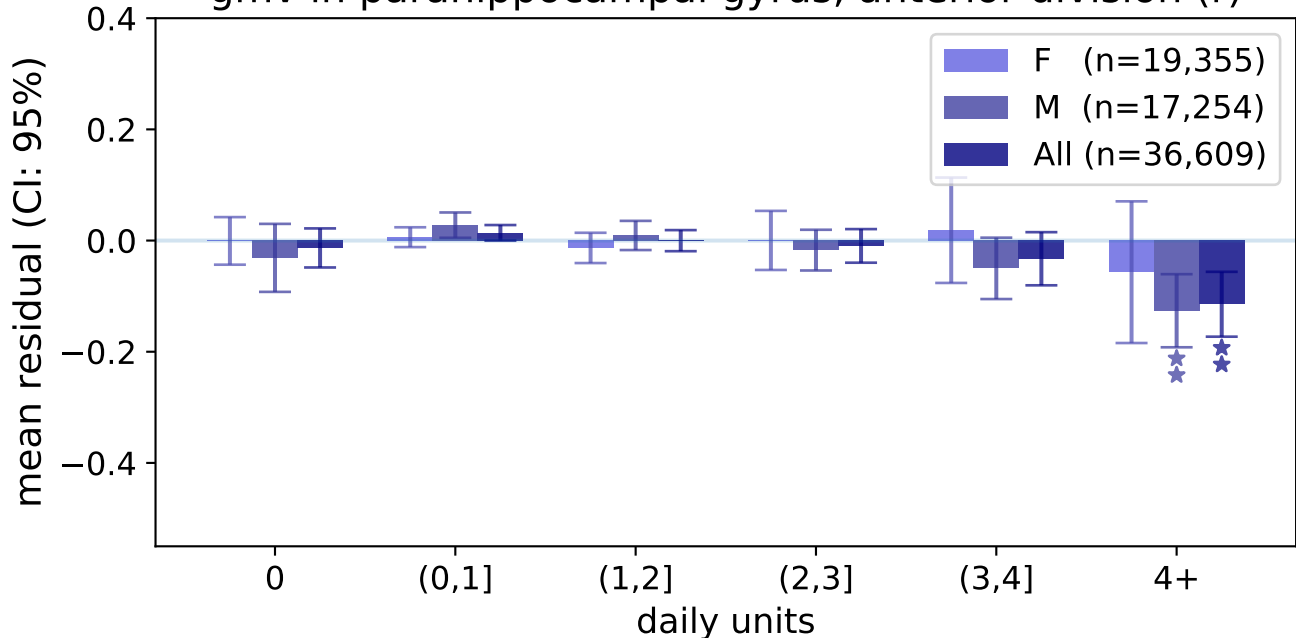

# gmv in parahippocampal gyrus, posterior division (l)

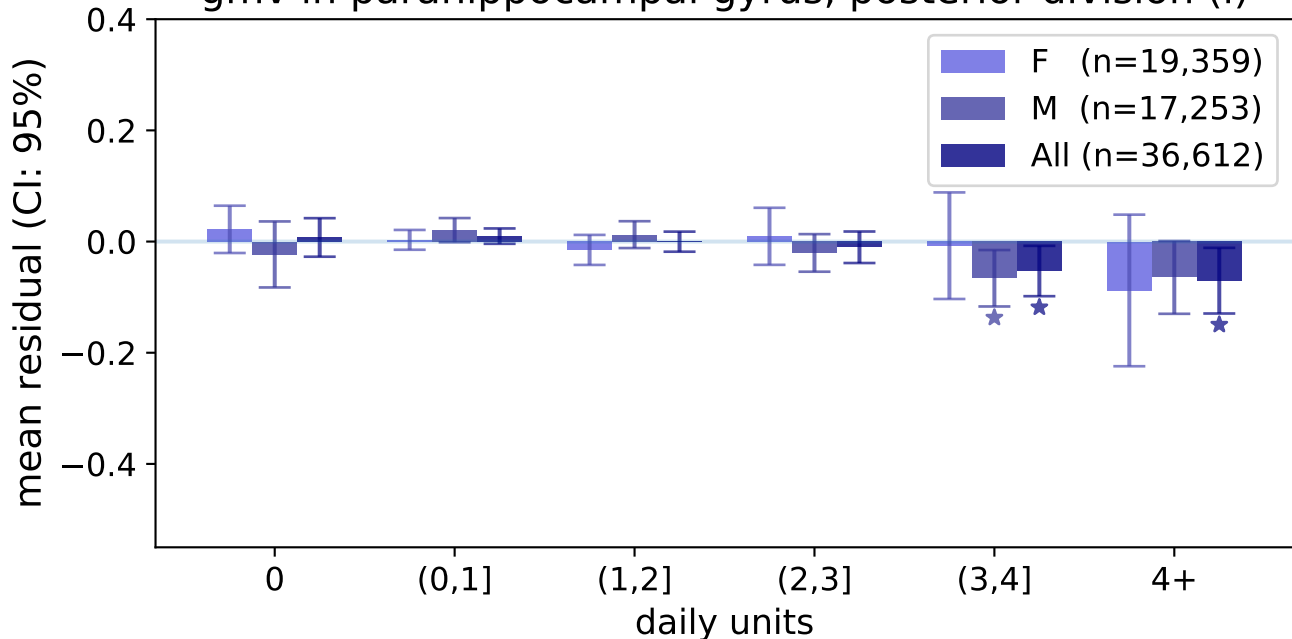

two-tailed test against [0,1] group: \*  $p < 0.01$ , \* \*  $p < 0.001$

# gmv in parahippocampal gyrus, posterior division (r)

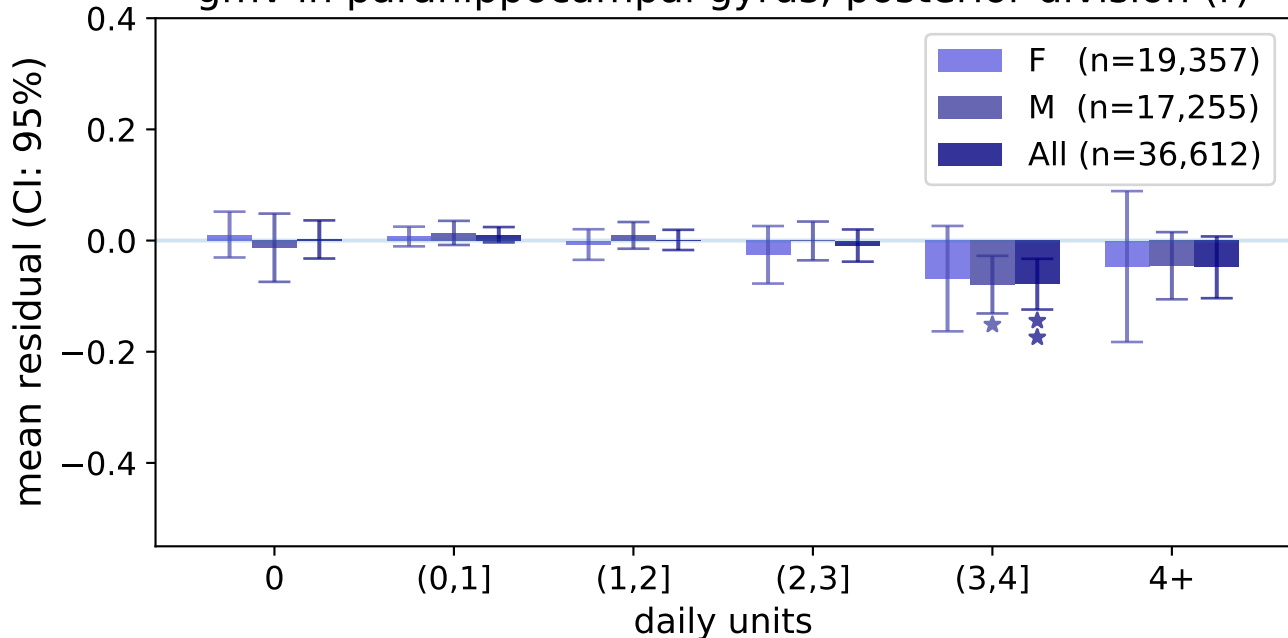

# gmv in lingual gyrus (I)

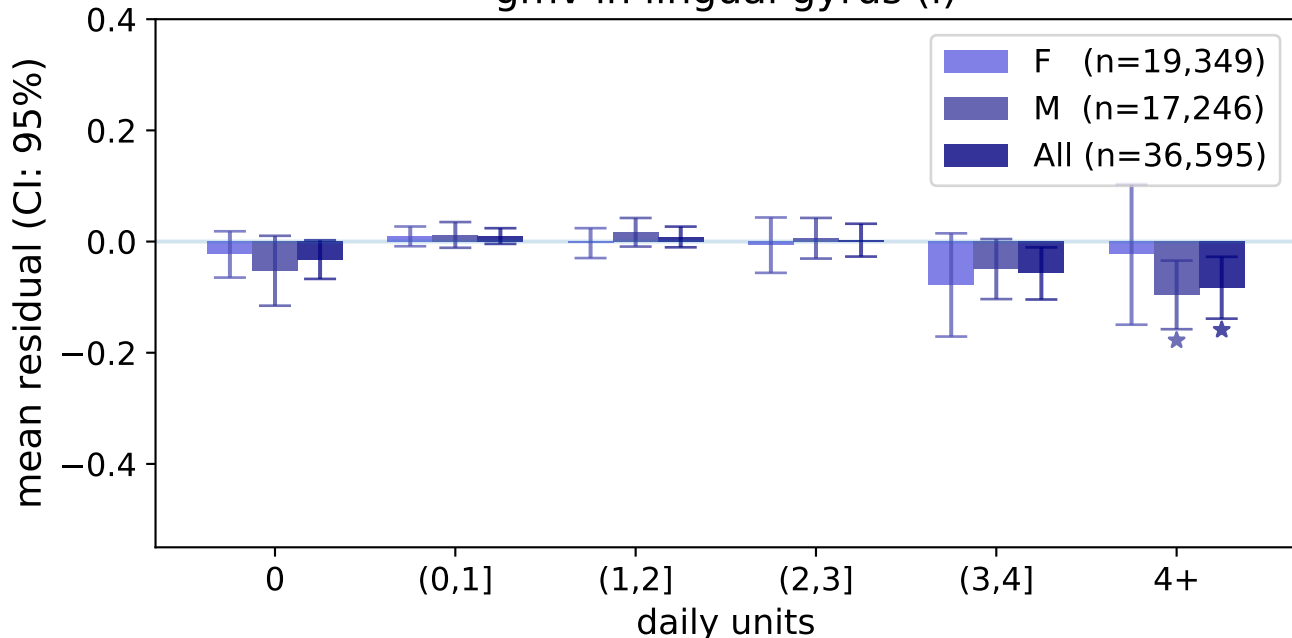

# gmv in lingual gyrus (r)

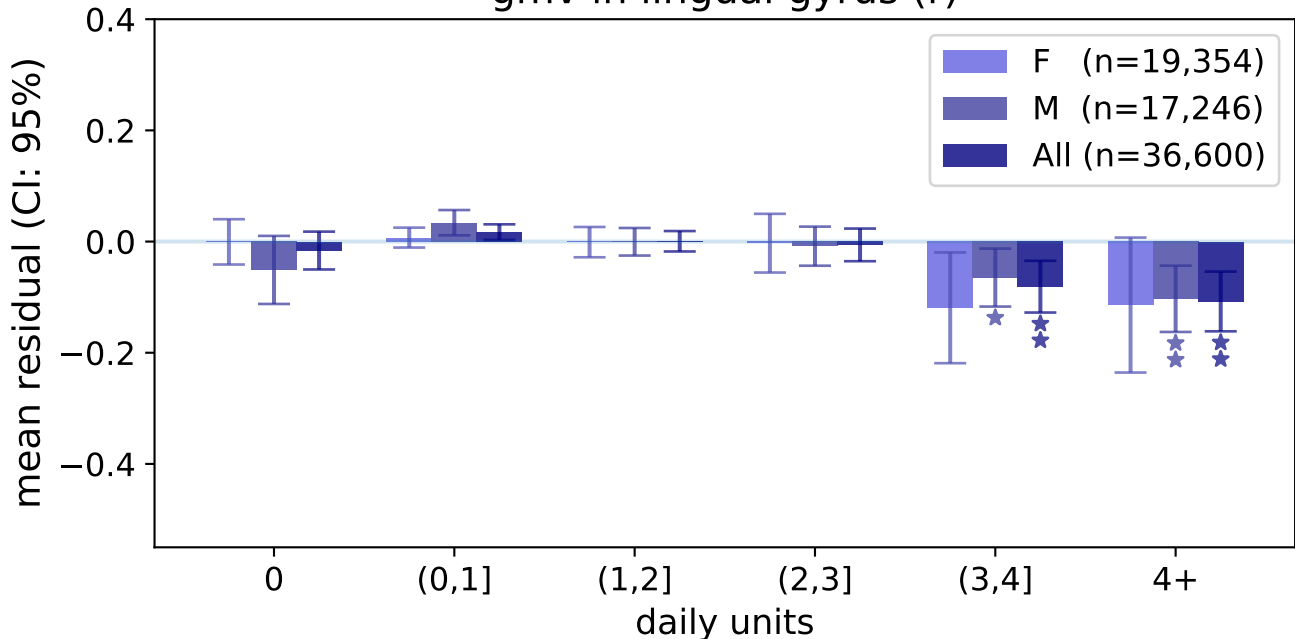

two-tailed test against [0,1] group: \* $p < 0.01$ , \* \*  $p < 0.001$

# gmv in temporal fusiform cortex, anterior division (I)

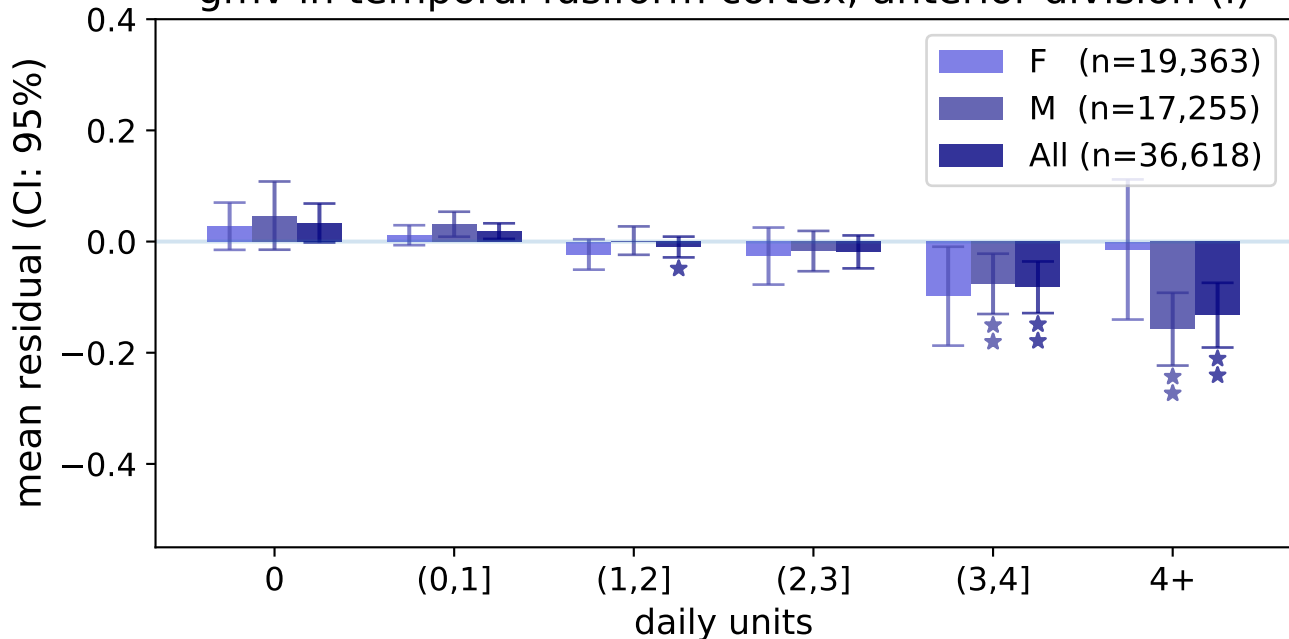

# gmv in temporal fusiform cortex, anterior division (r)

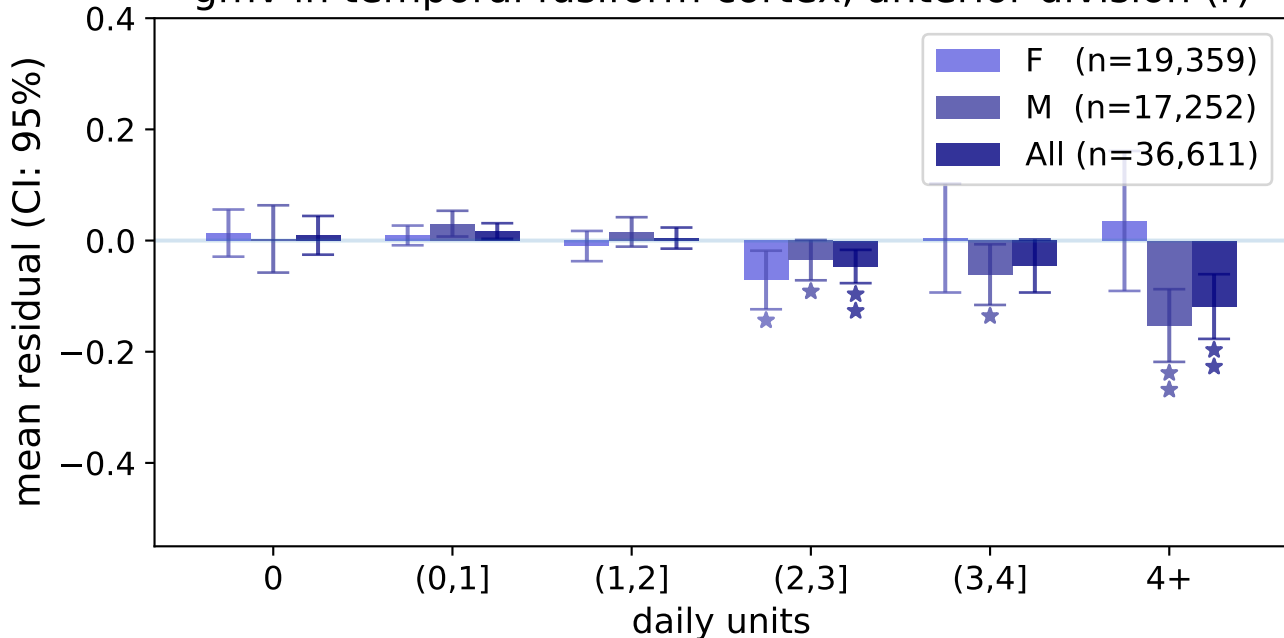

# gmv in temporal fusiform cortex, posterior division (I)

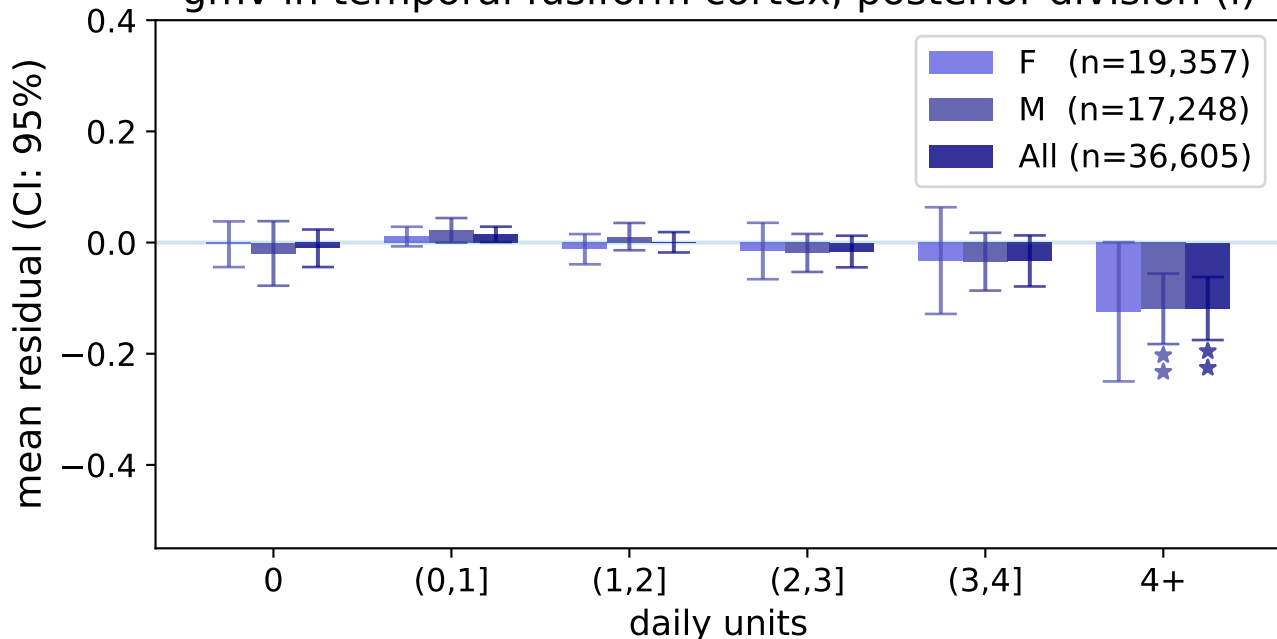

two-tailed test against [0,1] group: \* $p < 0.01$ , \* \*  $p < 0.001$

# gmv in temporal fusiform cortex, posterior division (r)

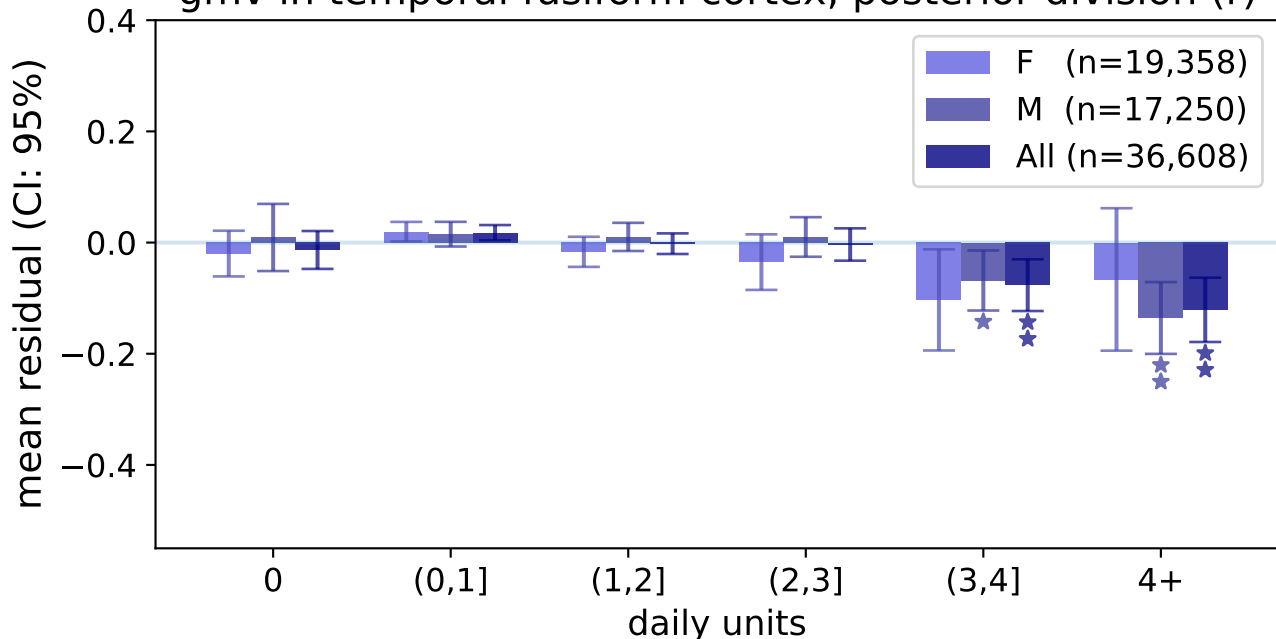

two-tailed test against [0,1] group: \* $p < 0.01$ , \*\* $p < 0.001$

# gmv in temporal occipital fusiform cortex (I)

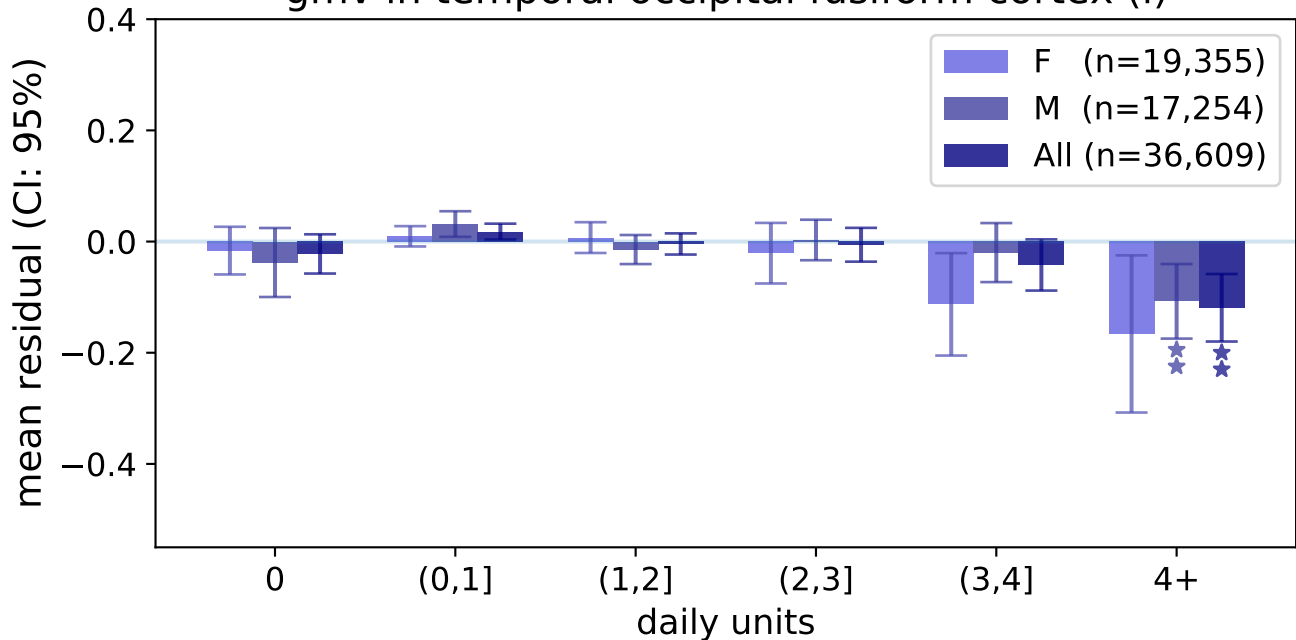

# gmv in temporal occipital fusiform cortex (r)

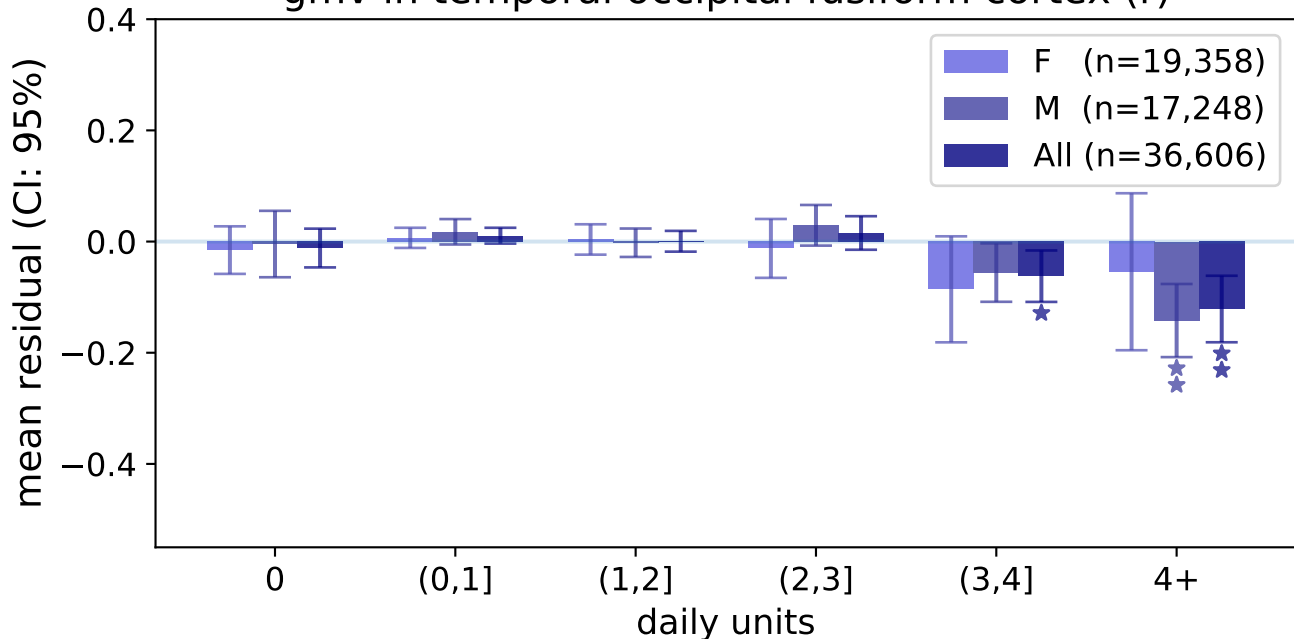

two-tailed test against [0,1] group: \* $p < 0.01$ , \* \*  $p < 0.001$

# gmv in occipital fusiform gyrus (I)

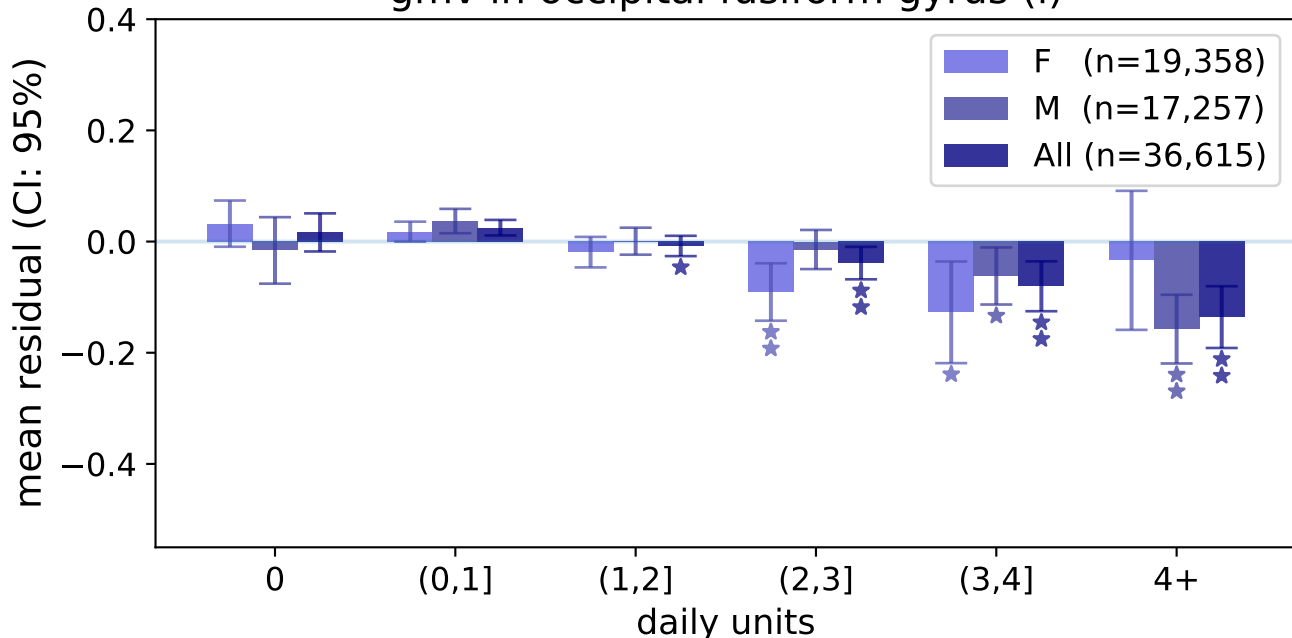

# gmv in occipital fusiform gyrus (r)

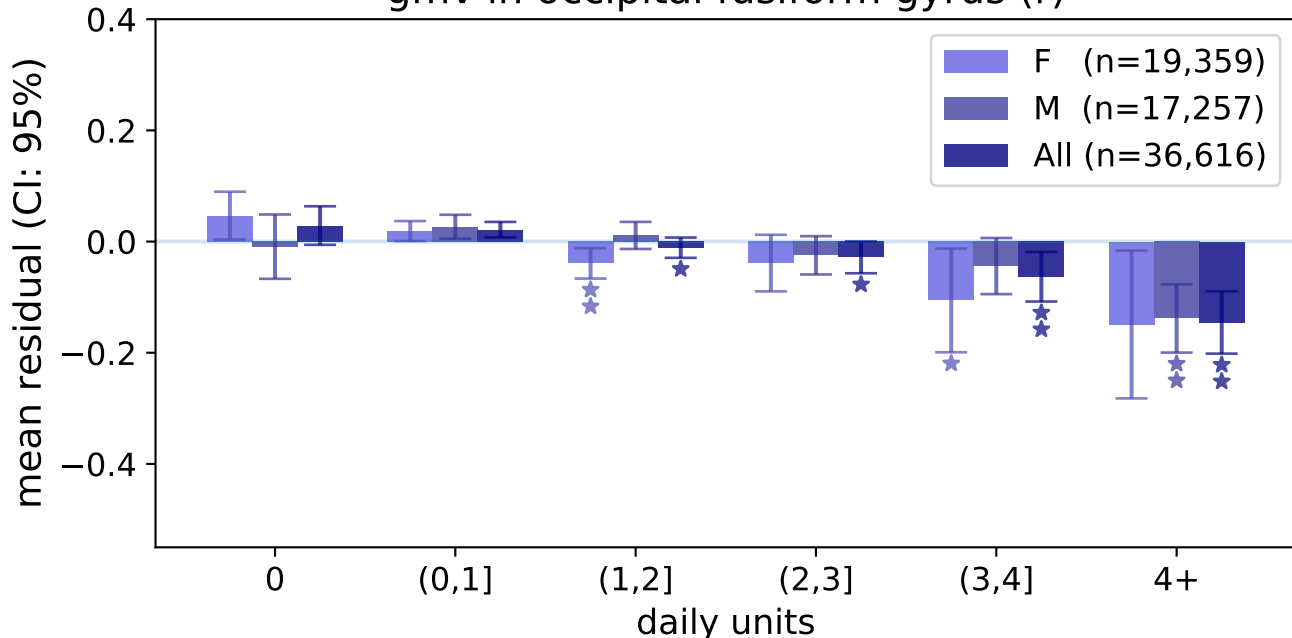

two-tailed test against [0,1] group: \* $p < 0.01$ , \*\* $p < 0.001$

# gmv in frontal operculum cortex (I)

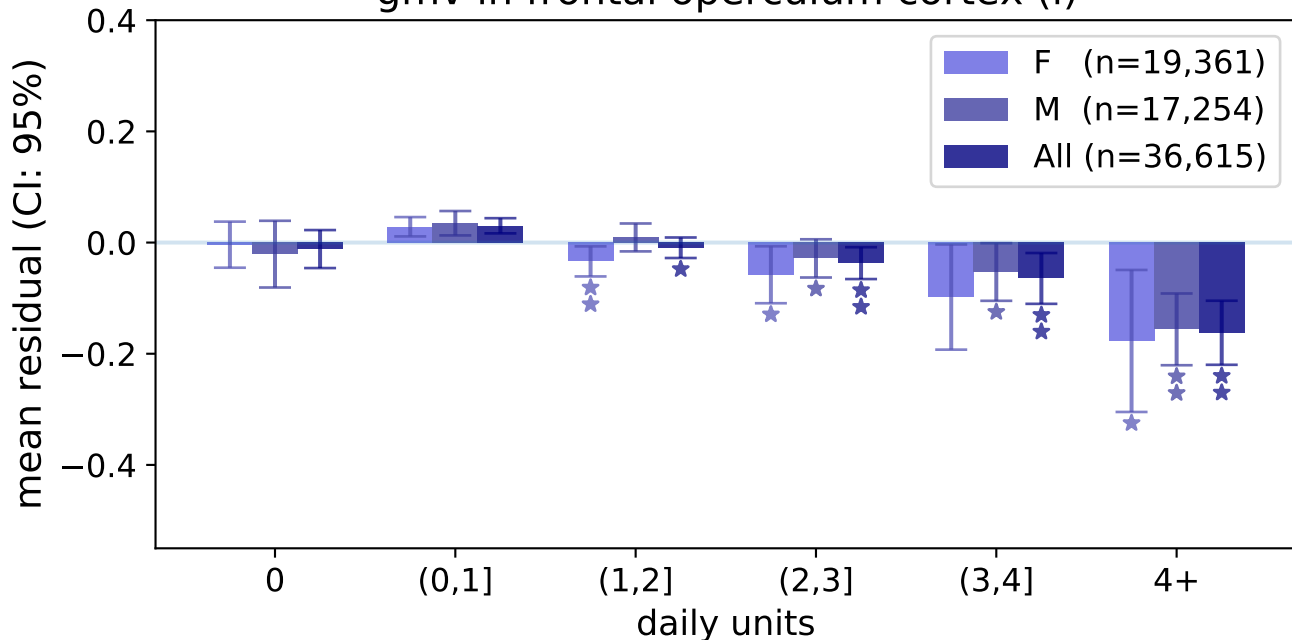

# gmv in frontal operculum cortex (r)

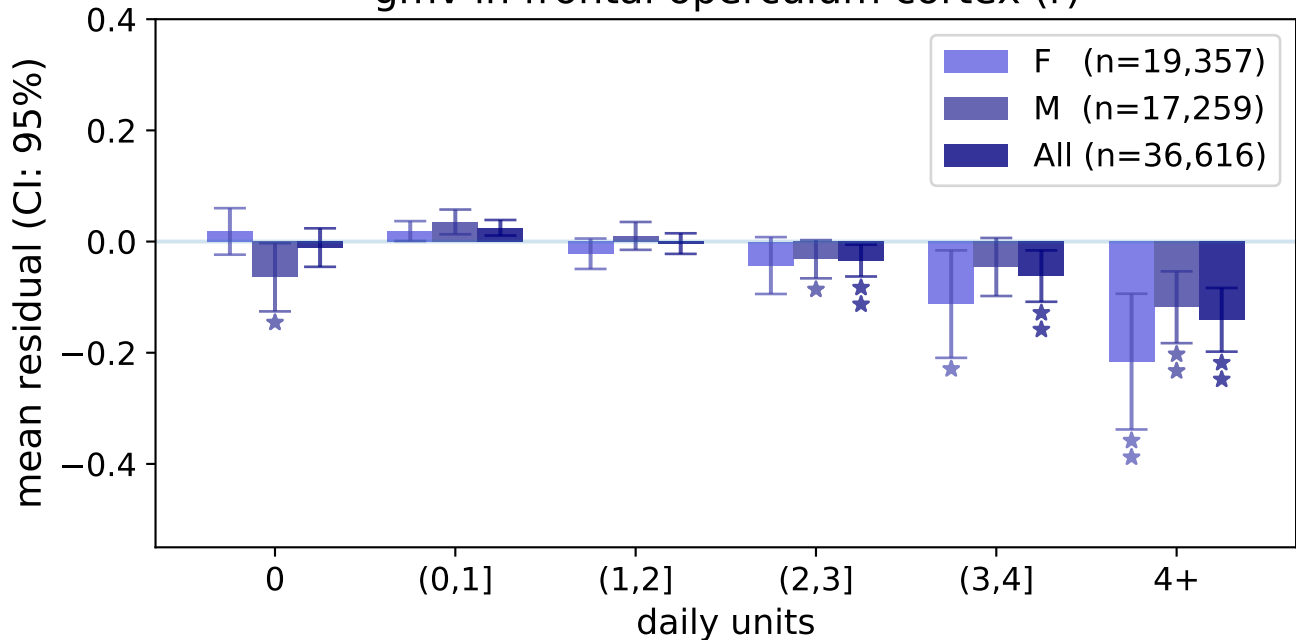

two-tailed test against [0,1] group: \* $p < 0.01$ , \*\* $p < 0.001$

# gmv in central opercular cortex (I)

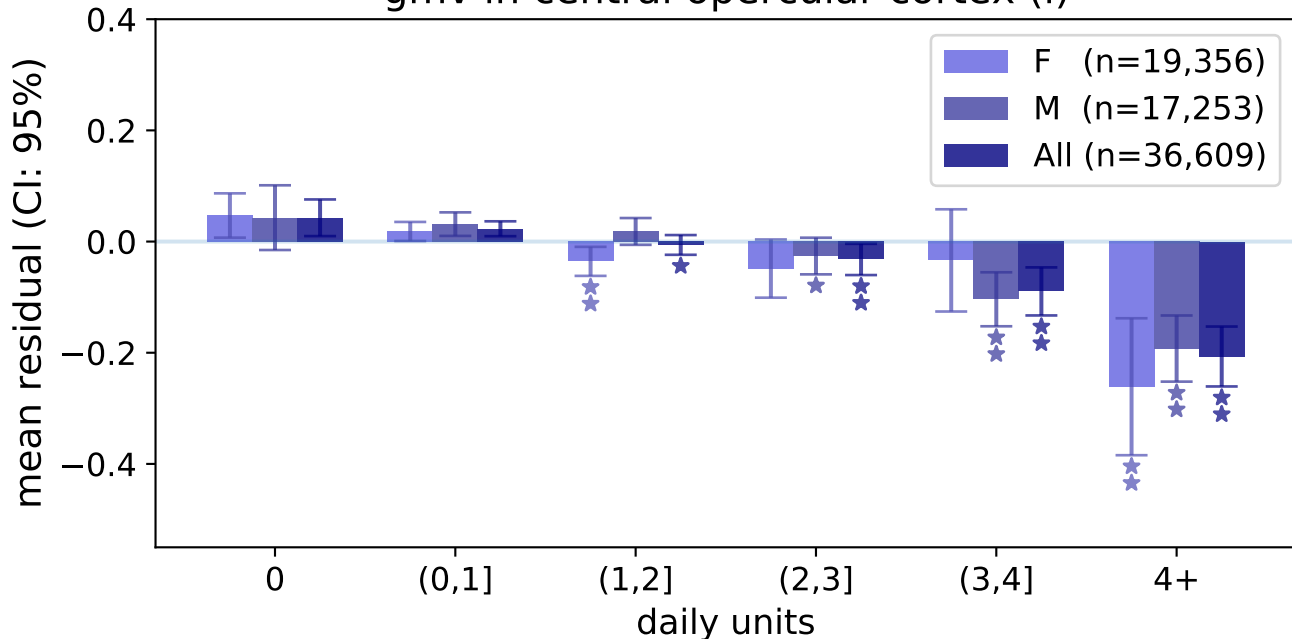

two-tailed test against [0,1] group: \* $p < 0.01$ , \*\* $p < 0.001$

# gmv in central opercular cortex (r)

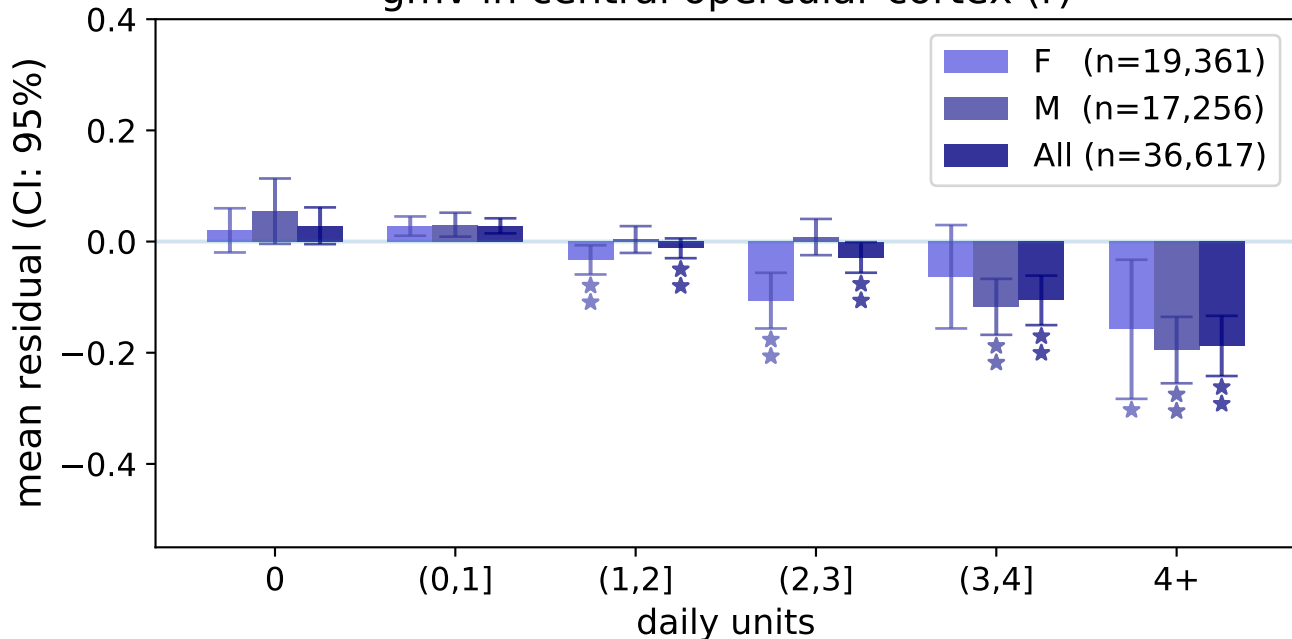

# gmv in parietal operculum cortex (I)

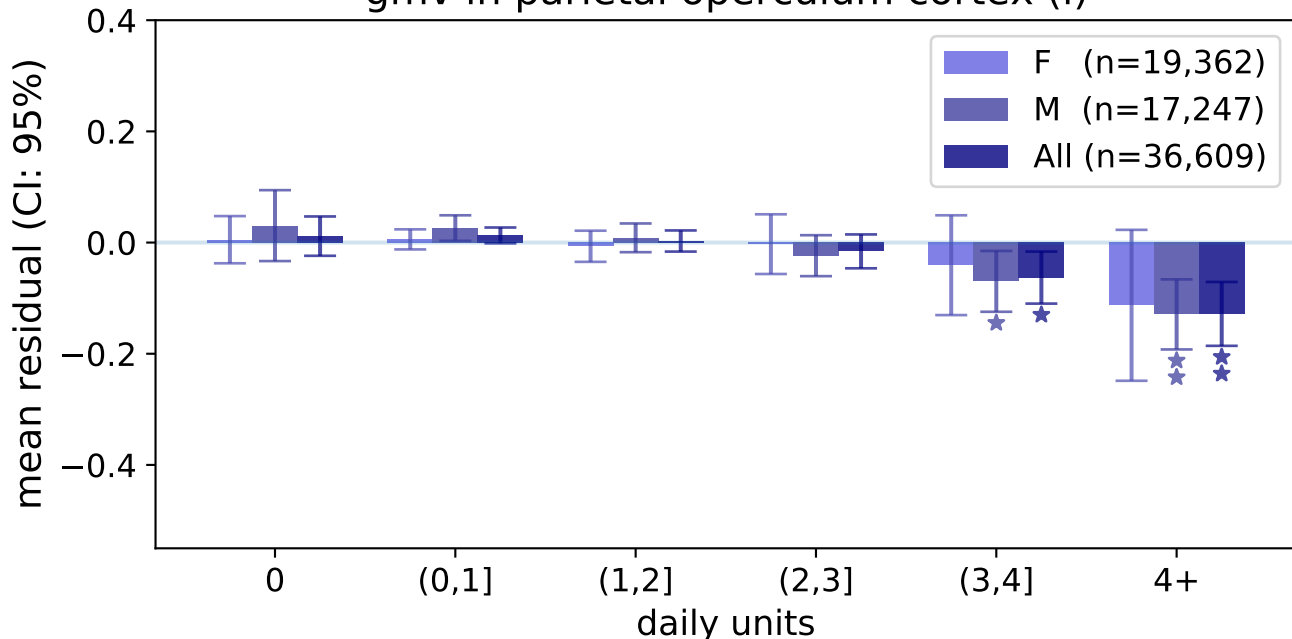

two-tailed test against [0,1] group: \* $p < 0.01$ , \* \*  $p < 0.001$

# gmv in parietal operculum cortex (r)

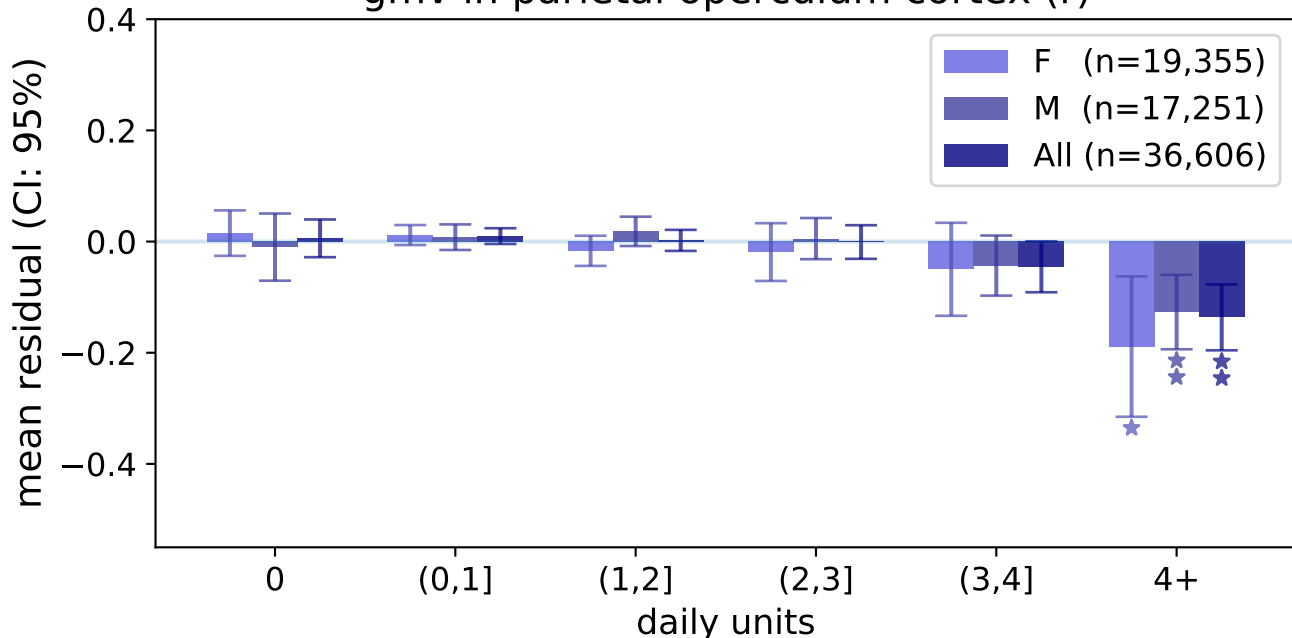

two-tailed test against [0,1] group: \* $p < 0.01$ , \* \*  $p < 0.001$

# gmv in planum polare (l)

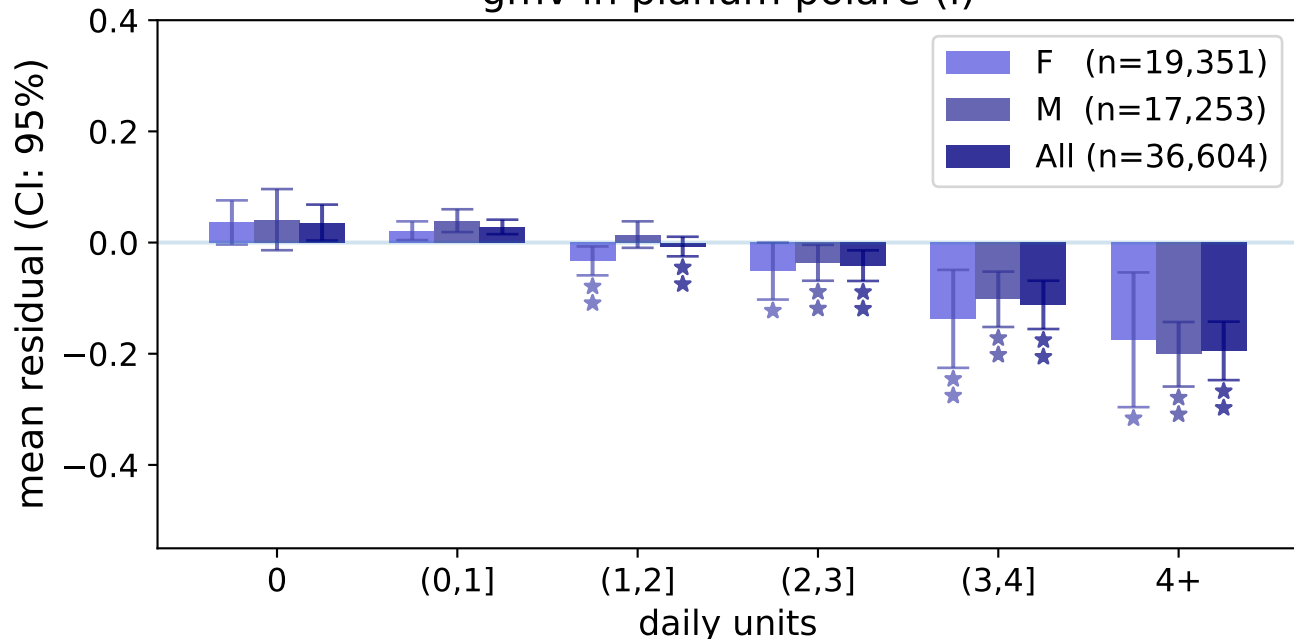

two-tailed test against [0,1] group: \*  $p < 0.01$ , \* \*  $p < 0.001$

# gmv in planum polare (r)

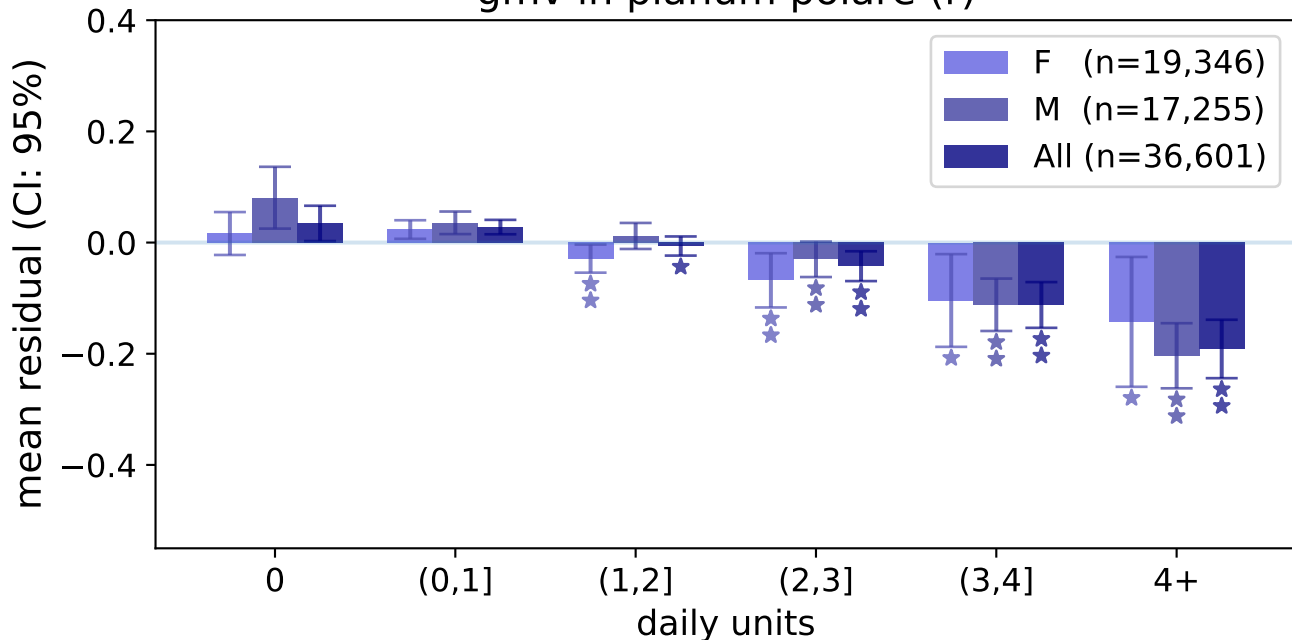

two-tailed test against [0,1] group: \*  $p < 0.01$ , \* \*  $p < 0.001$

# gmv in heschl's gyrus (includes h1 and h2) (I)

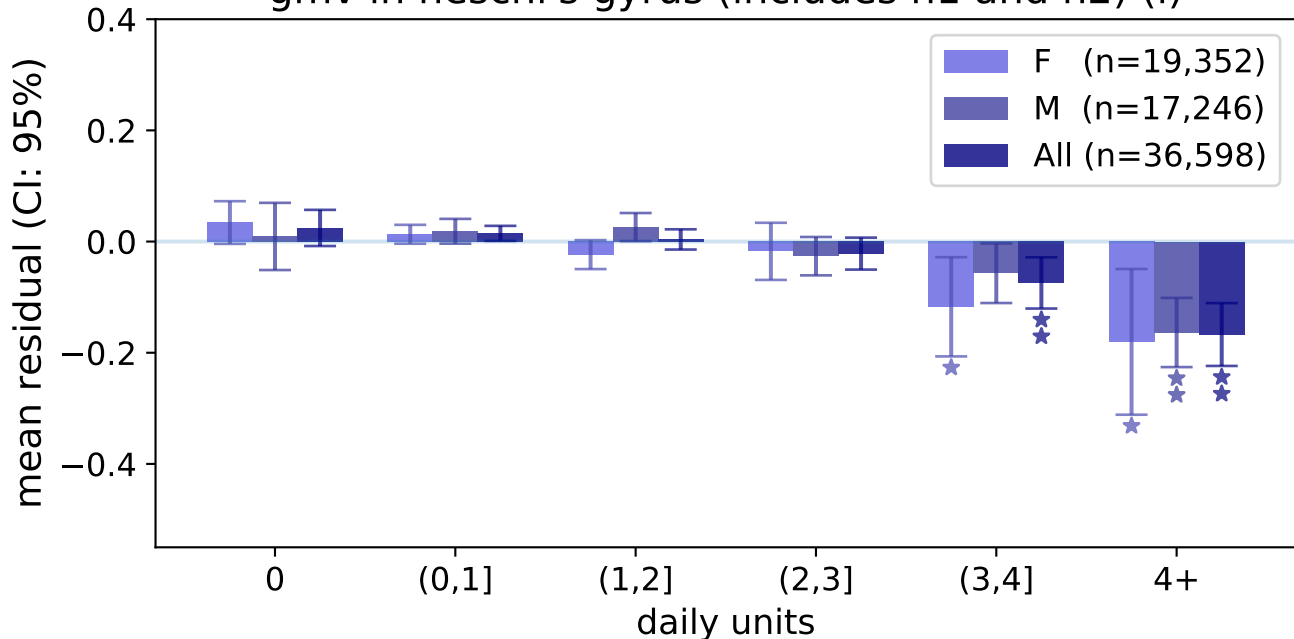

# gmv in heschl's gyrus (includes h1 and h2) (r)

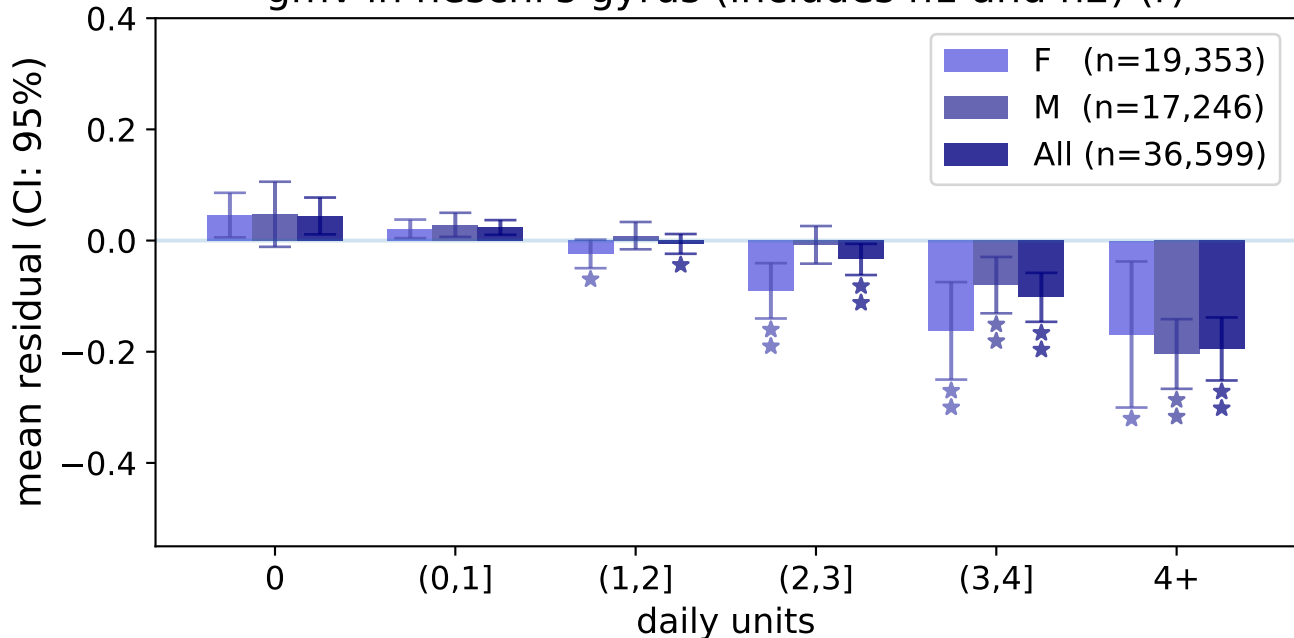

# gmv in planum temporale (I)

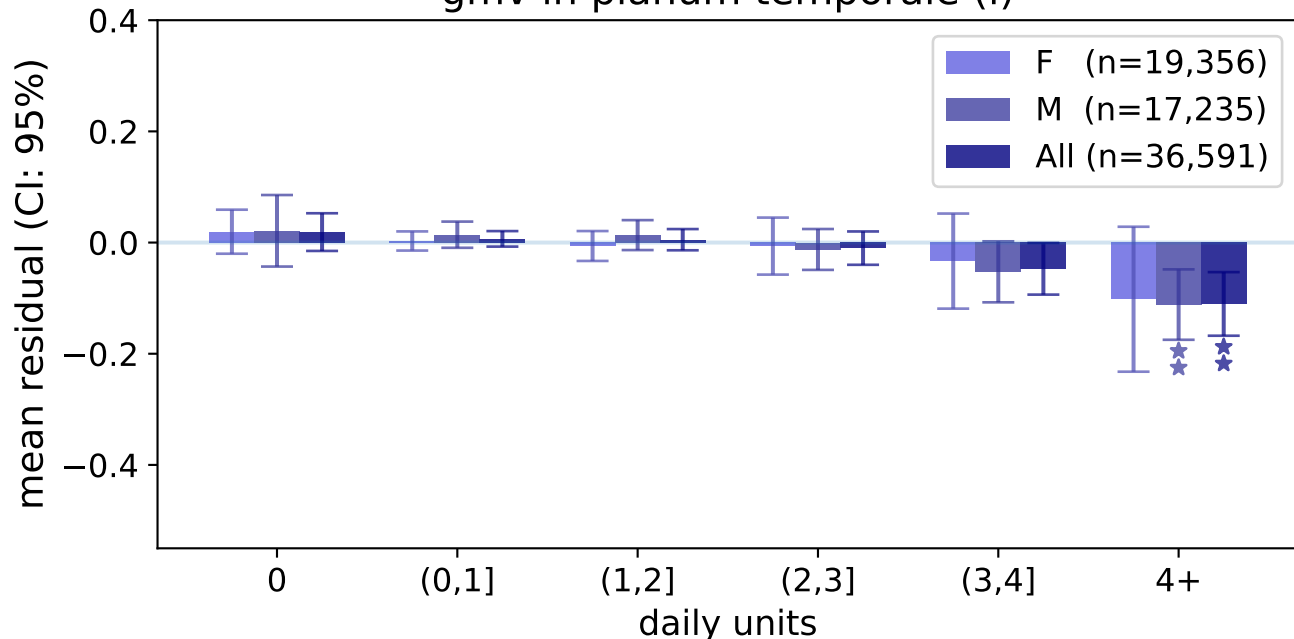

two-tailed test against [0,1] group: \* $p < 0.01$ , \* \*  $p < 0.001$

# gmv in planum temporale (r)

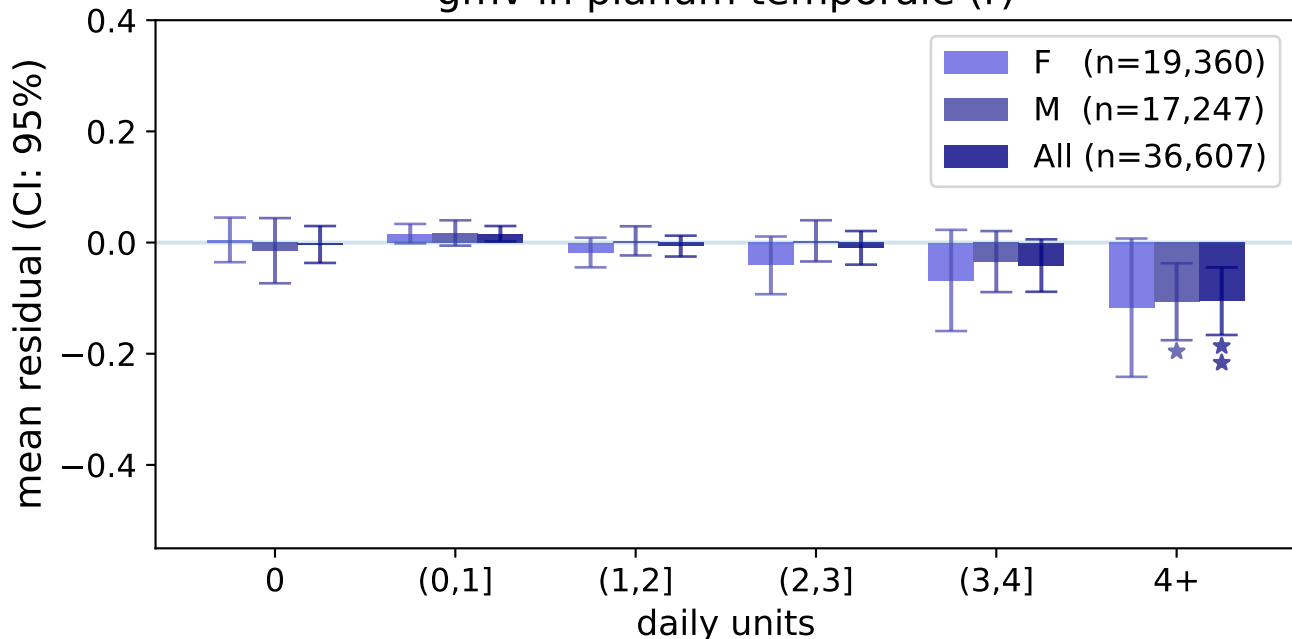

# gmv in supracalcarine cortex (I)

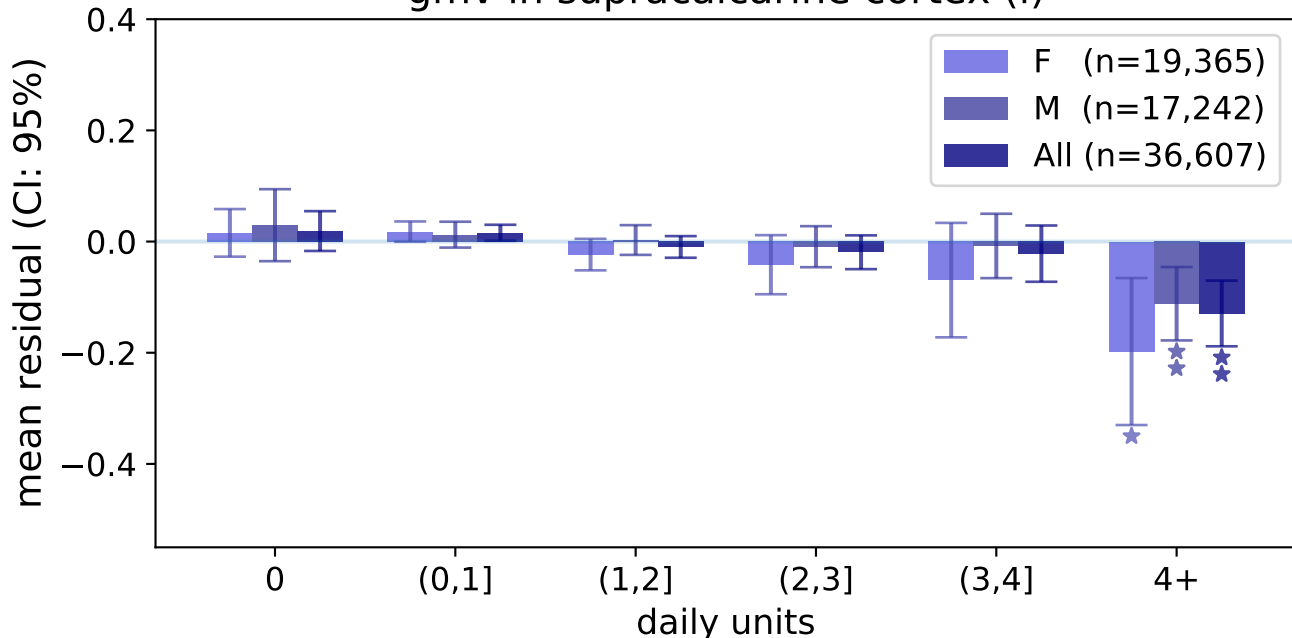

# gmv in supracalcarine cortex (r)

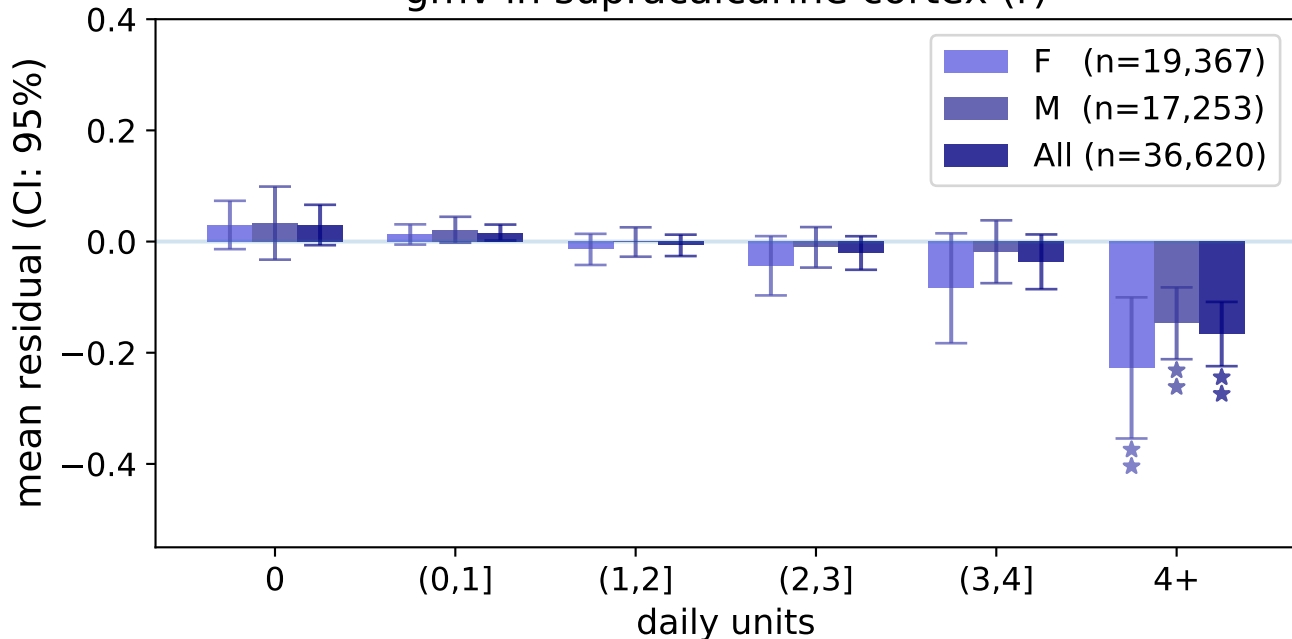

# gmv in occipital pole (l)

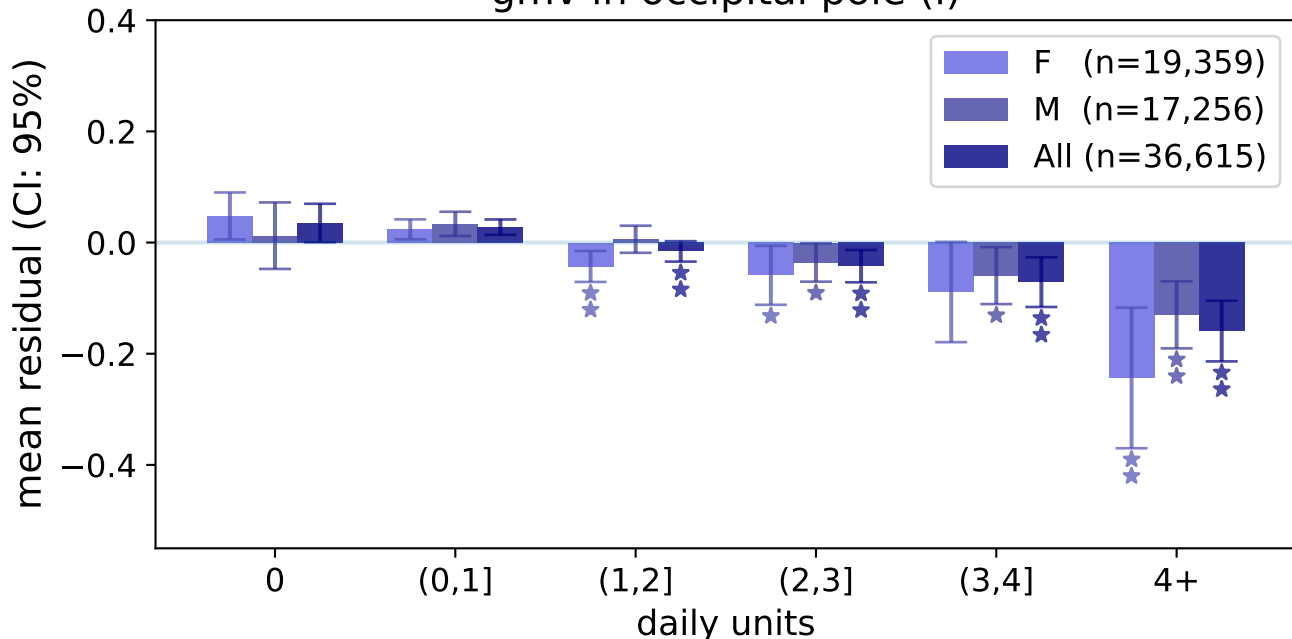

two-tailed test against [0,1] group: \*  $p < 0.01$ , \*\*  $p < 0.001$

# gmv in occipital pole (r)

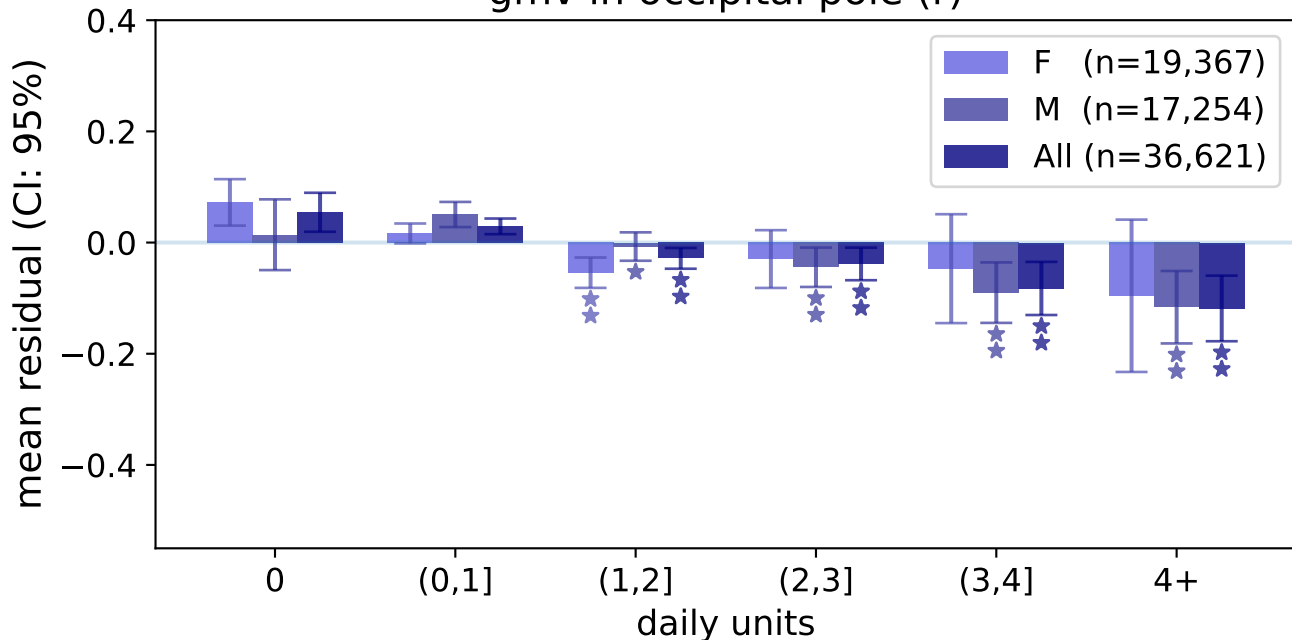

two-tailed test against [0,1] group: \*  $p < 0.01$ , \* \*  $p < 0.001$

# gmv in thalamus (I)

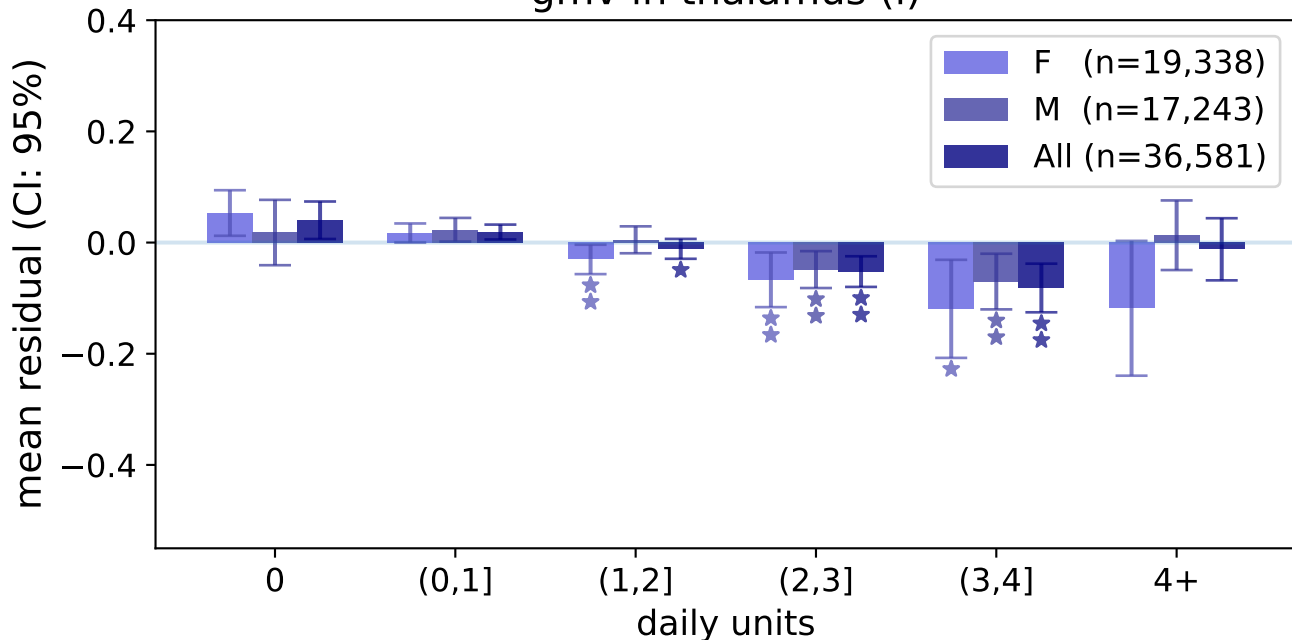

two-tailed test against [0,1] group: \*  $p < 0.01$ , \*\*  $p < 0.001$

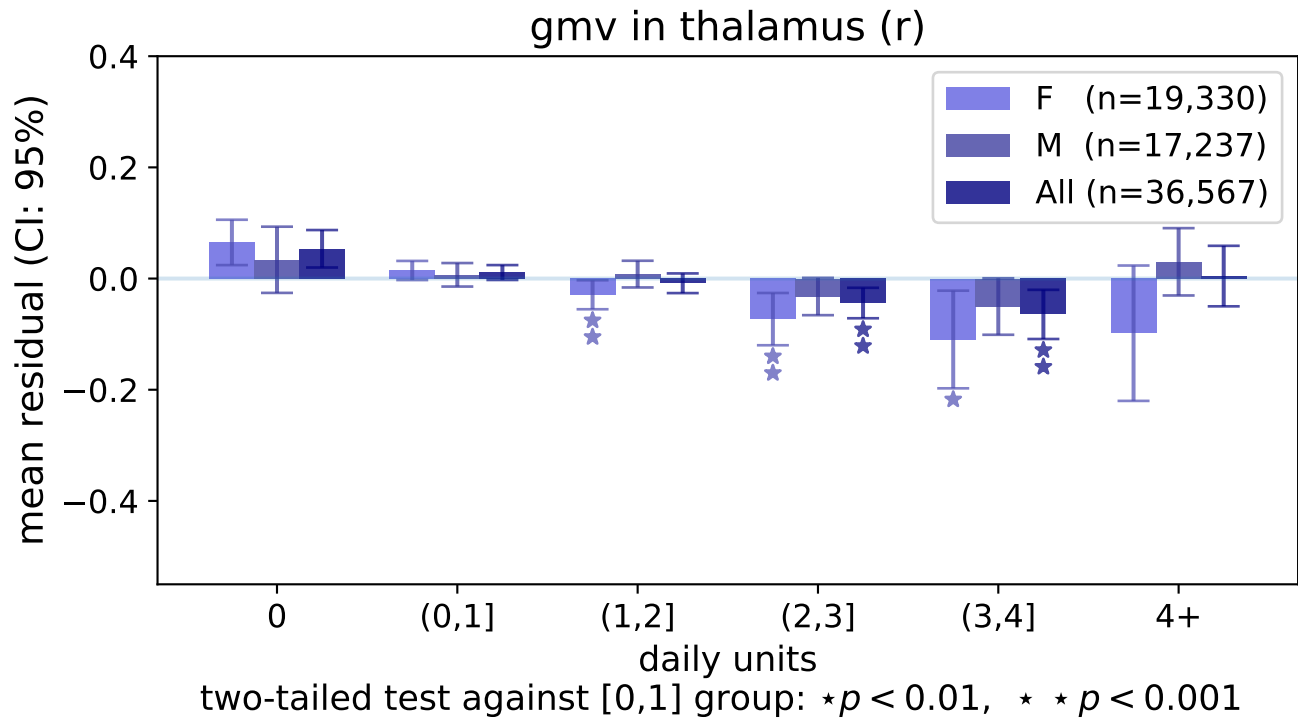

# gmv in caudate (I)

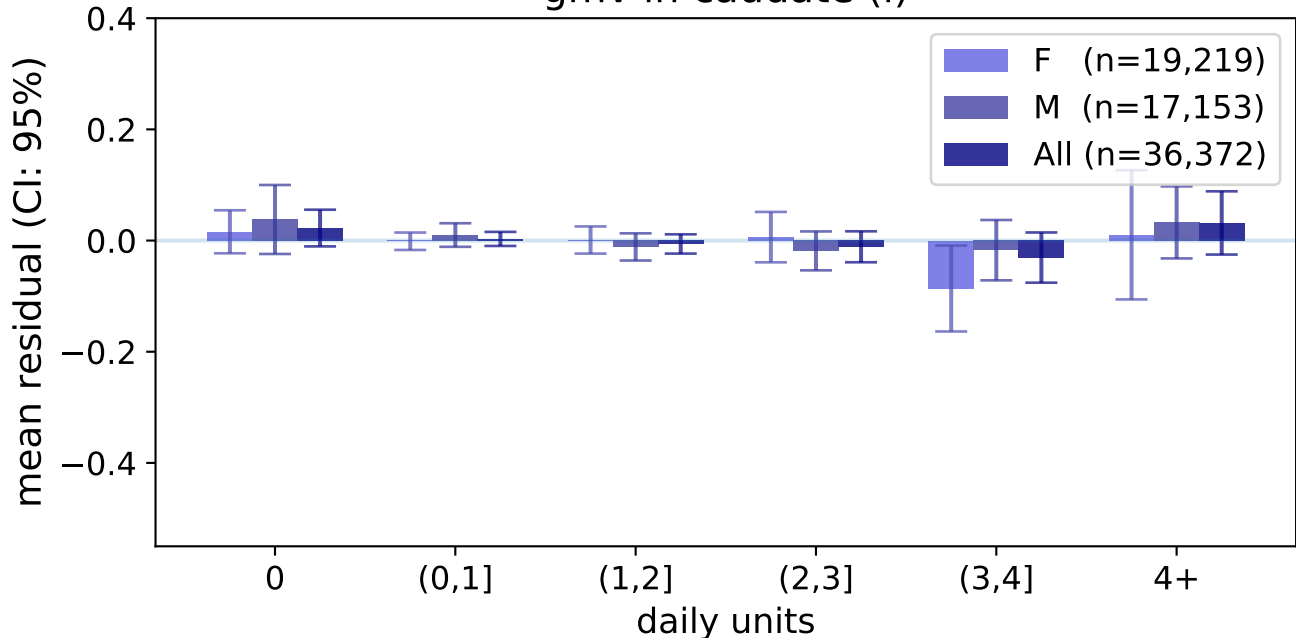

two-tailed test against [0,1] group: \*  $p < 0.01$ , \* \*  $p < 0.001$

# gmv in caudate (r)

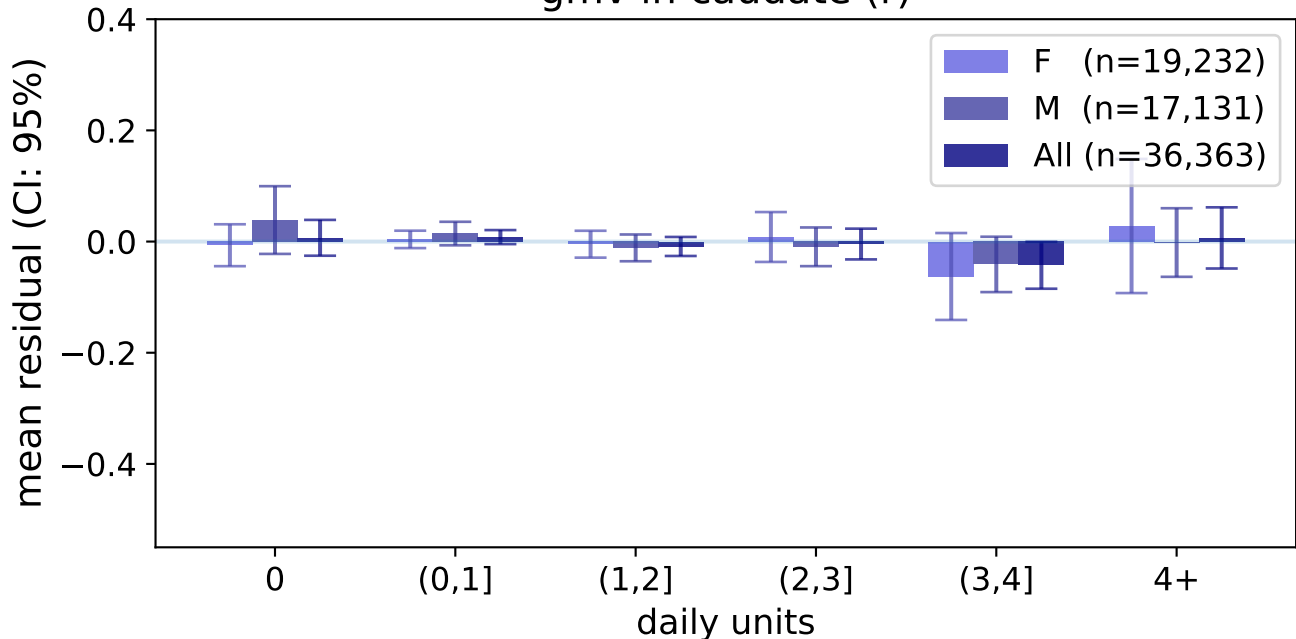

two-tailed test against [0,1] group: \* $p < 0.01$ , \*\* $p < 0.001$

# gmv in putamen (I)

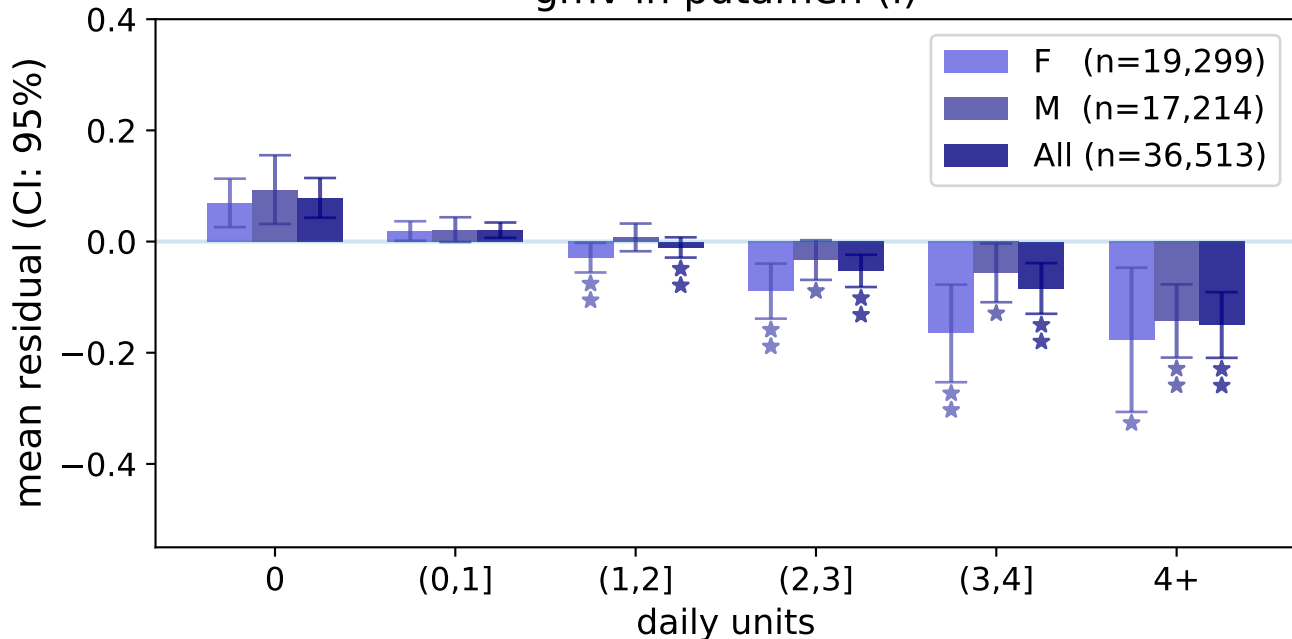

two-tailed test against [0,1] group: \*  $p < 0.01$ , \* \*  $p < 0.001$

# gmv in putamen (r)

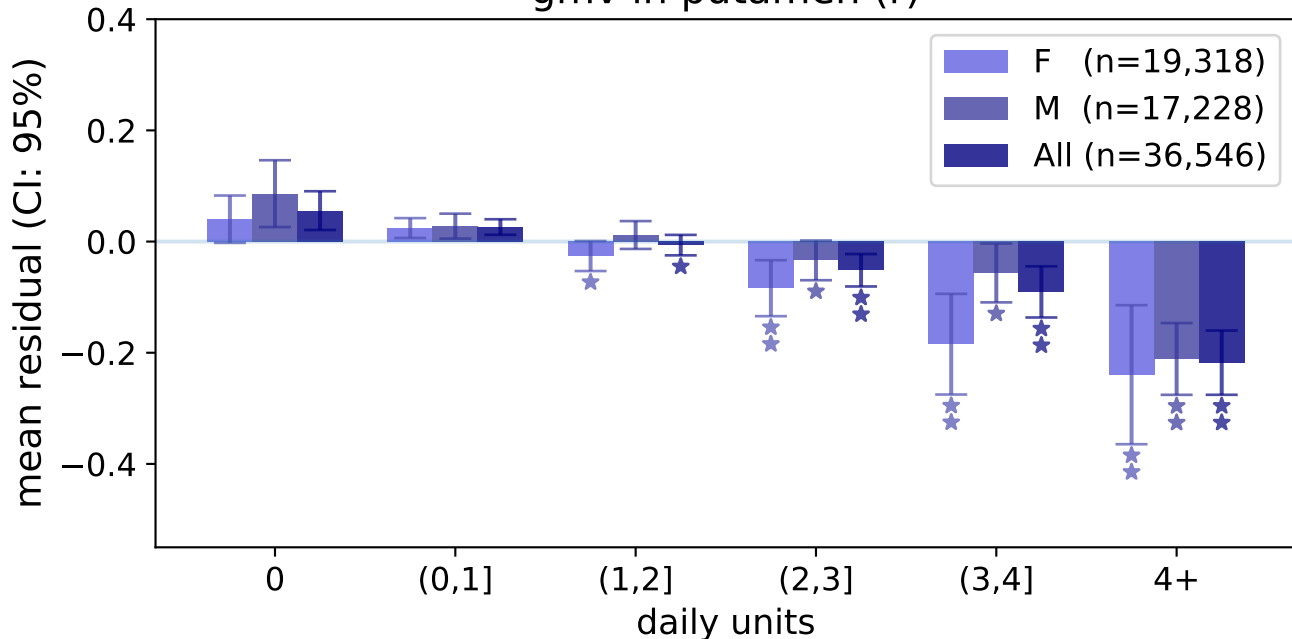

two-tailed test against [0,1] group: \*  $p < 0.01$ , \* \*  $p < 0.001$

# gmv in pallidum (l)

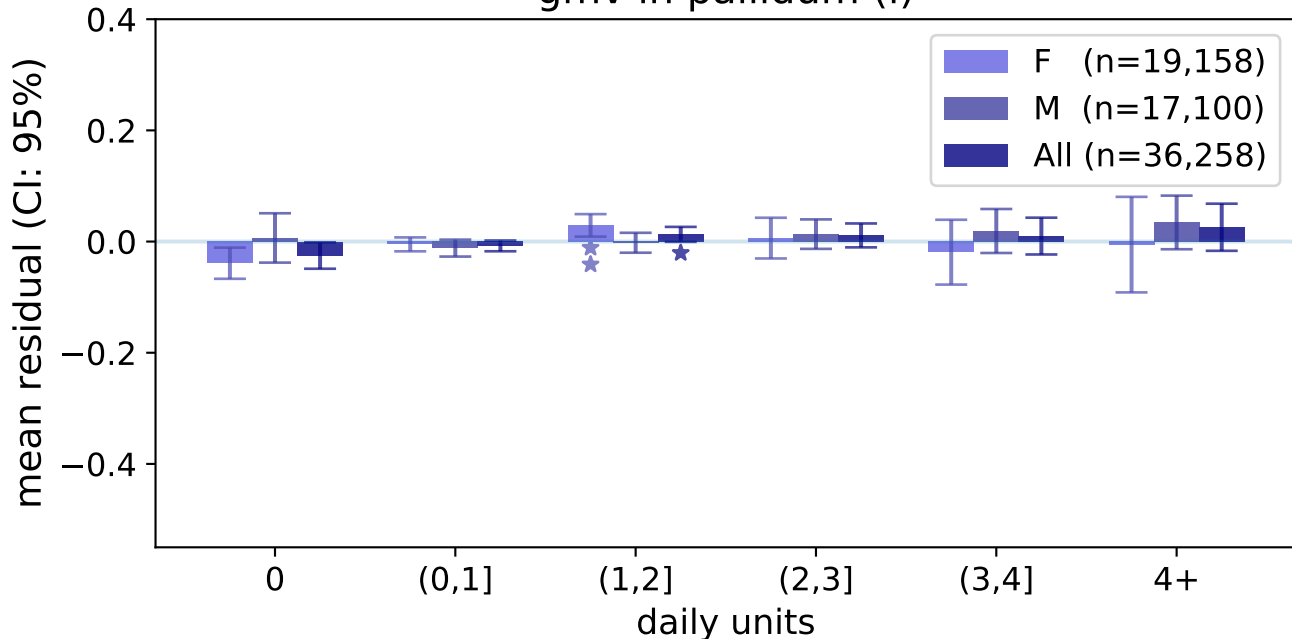

# gmv in pallidum (r)

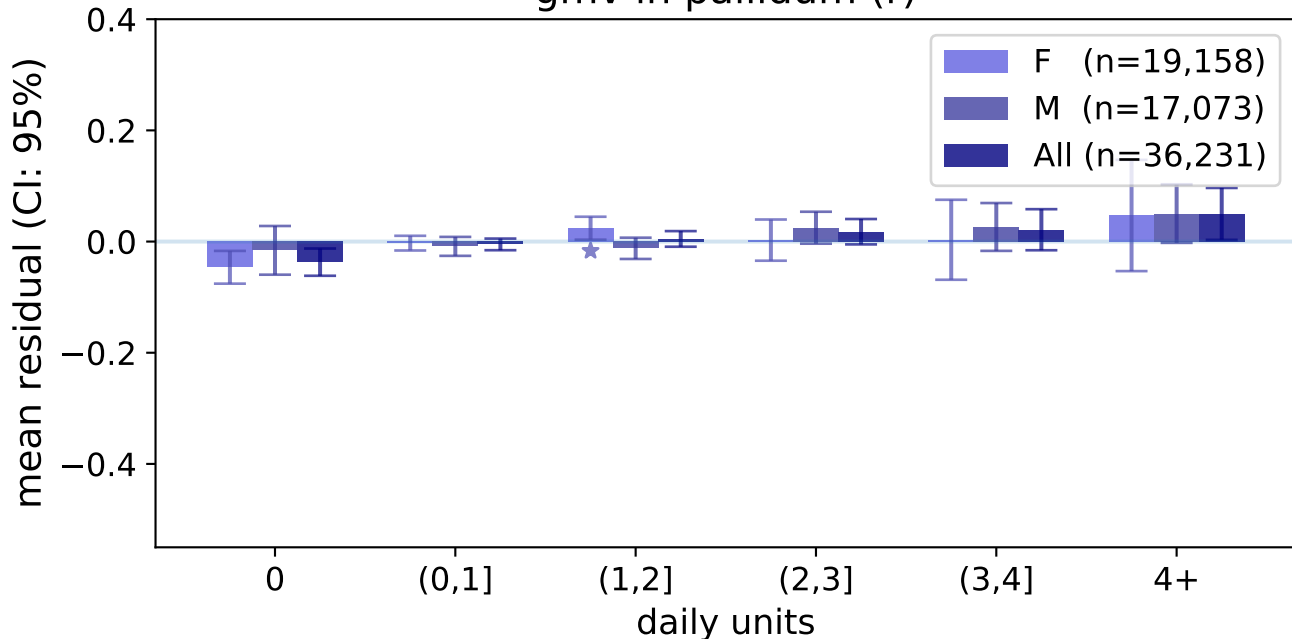

two-tailed test against [0,1] group: \* $p < 0.01$ , \* \*  $p < 0.001$

# gmv in hippocampus (l)

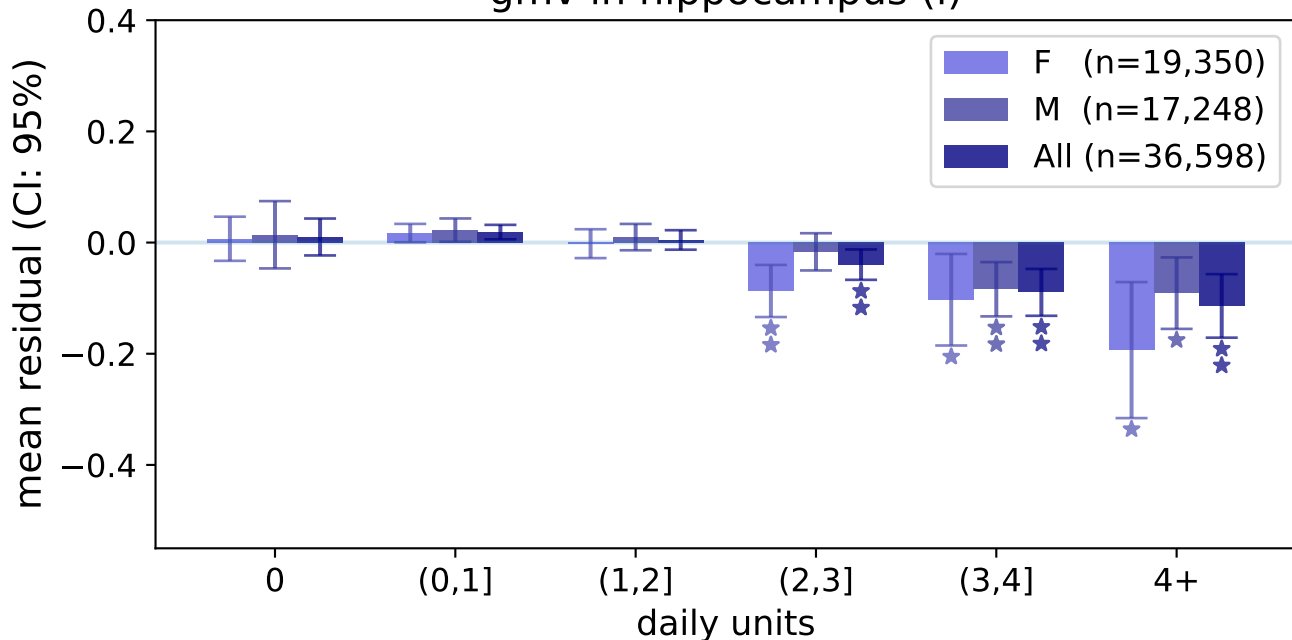

two-tailed test against [0,1] group: \*  $p < 0.01$ , \* \*  $p < 0.001$

# gmv in hippocampus (r)

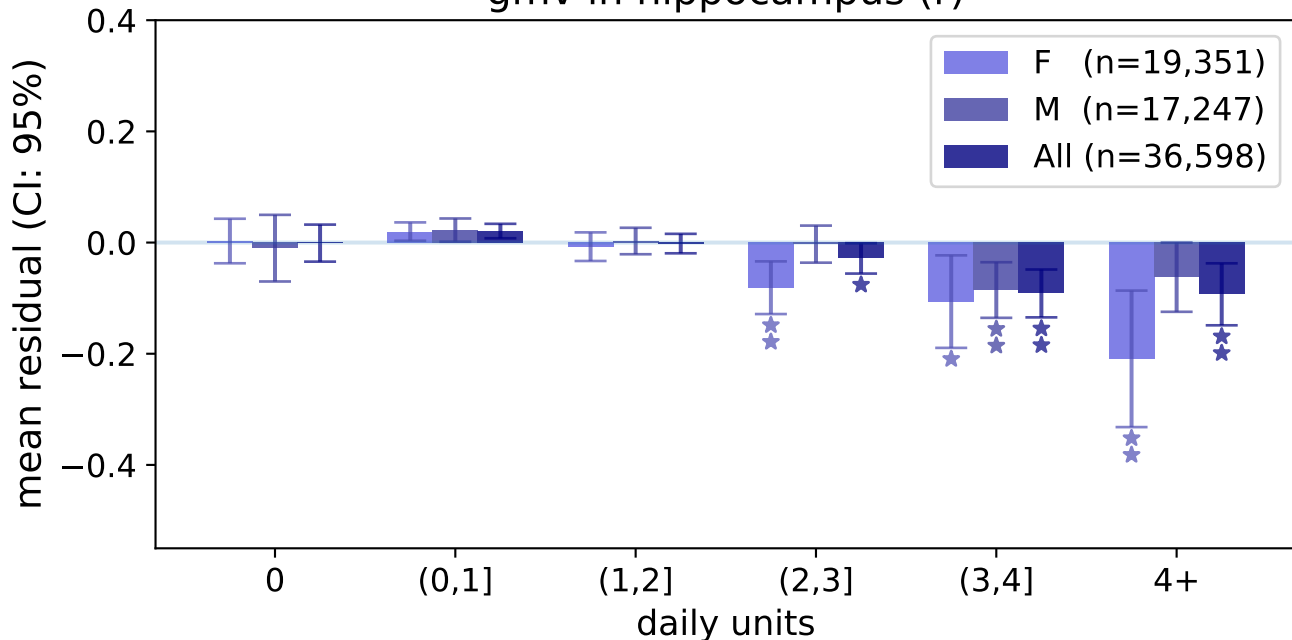

# gmv in amygdala (I)

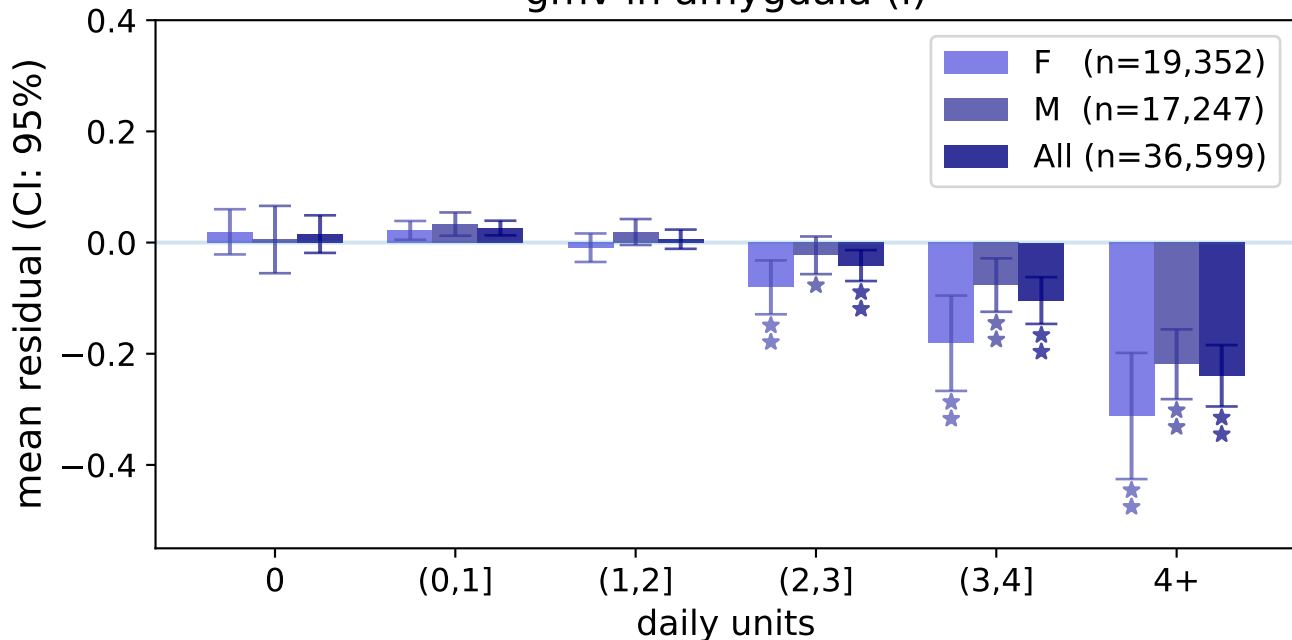

# gmv in amygdala (r)

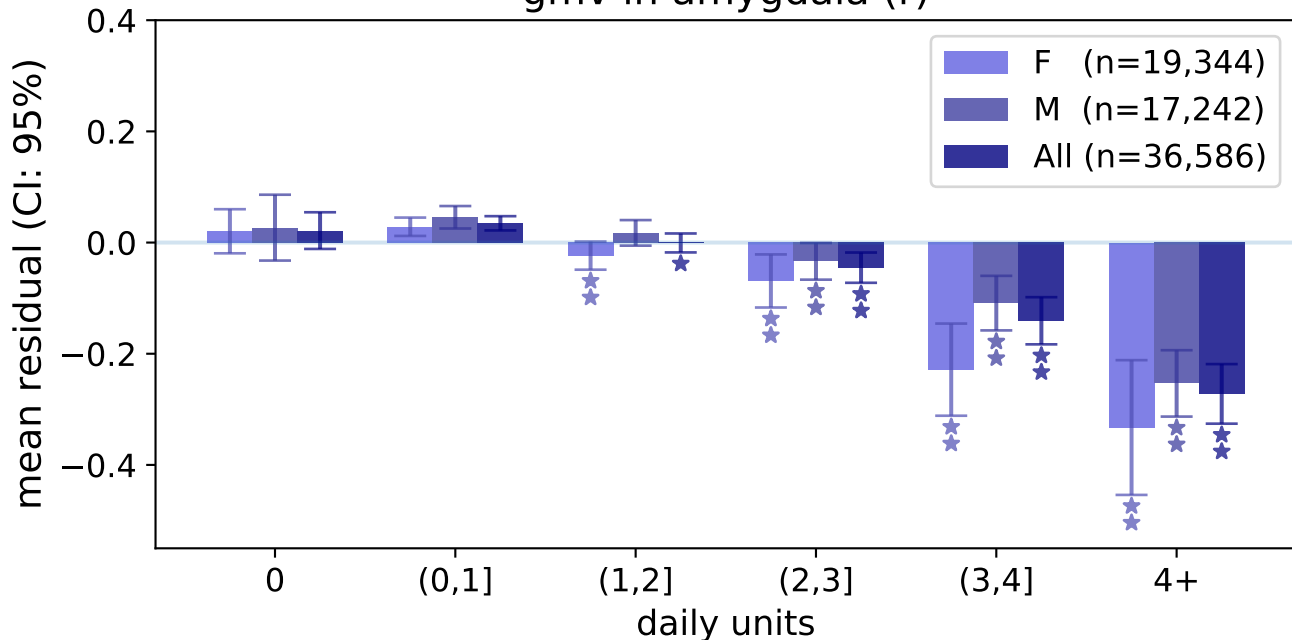

two-tailed test against [0,1] group: \*  $p < 0.01$ , \* \*  $p < 0.001$

# gmv in ventral striatum (I)

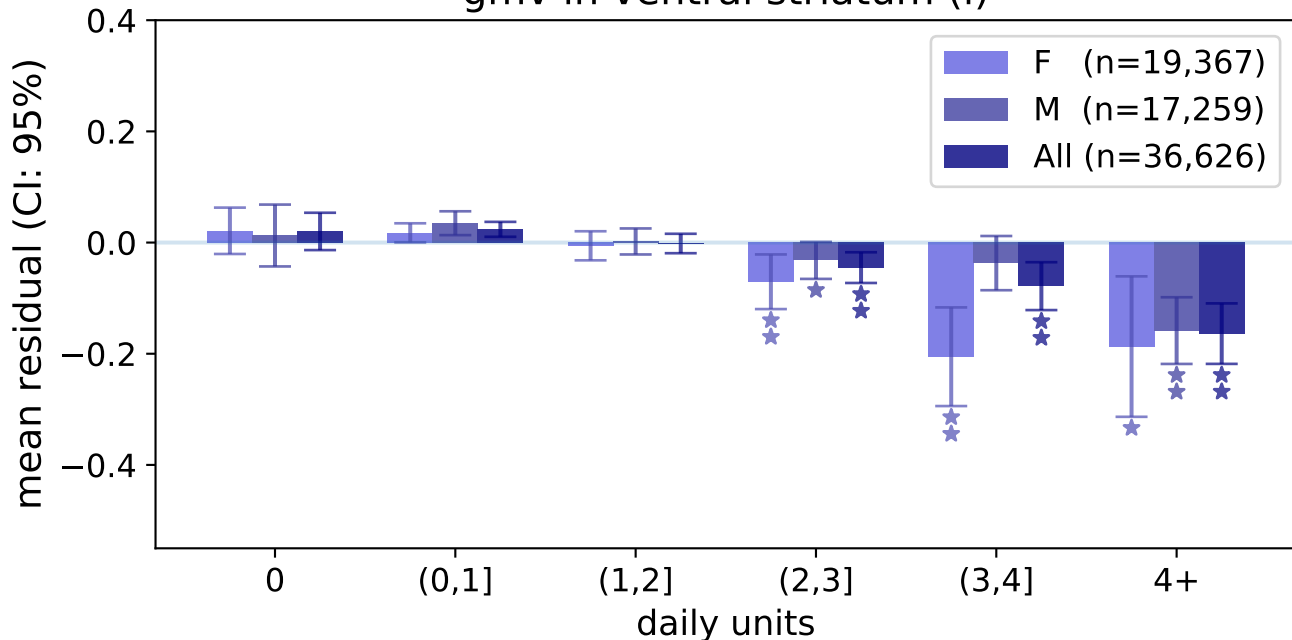

two-tailed test against [0,1] group: \*  $p < 0.01$ , \* \*  $p < 0.001$

# gmv in ventral striatum (r)

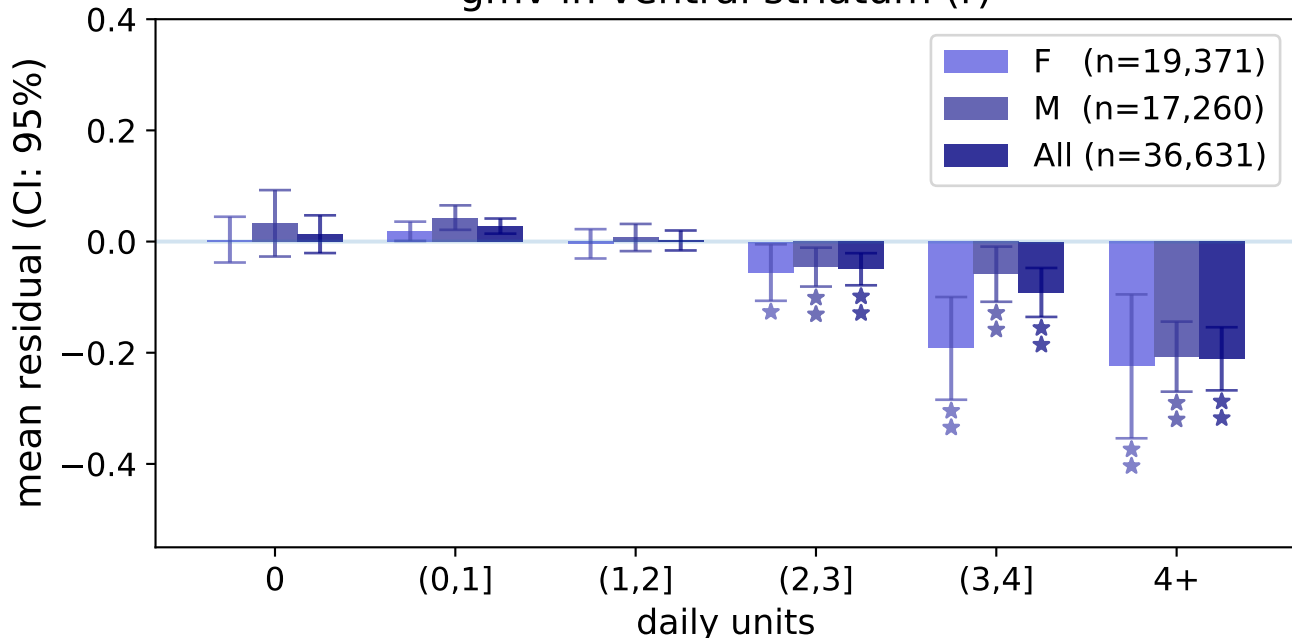

two-tailed test against [0,1] group: \*  $p < 0.01$ , \* \*  $p < 0.001$

## gmv in brain-stem

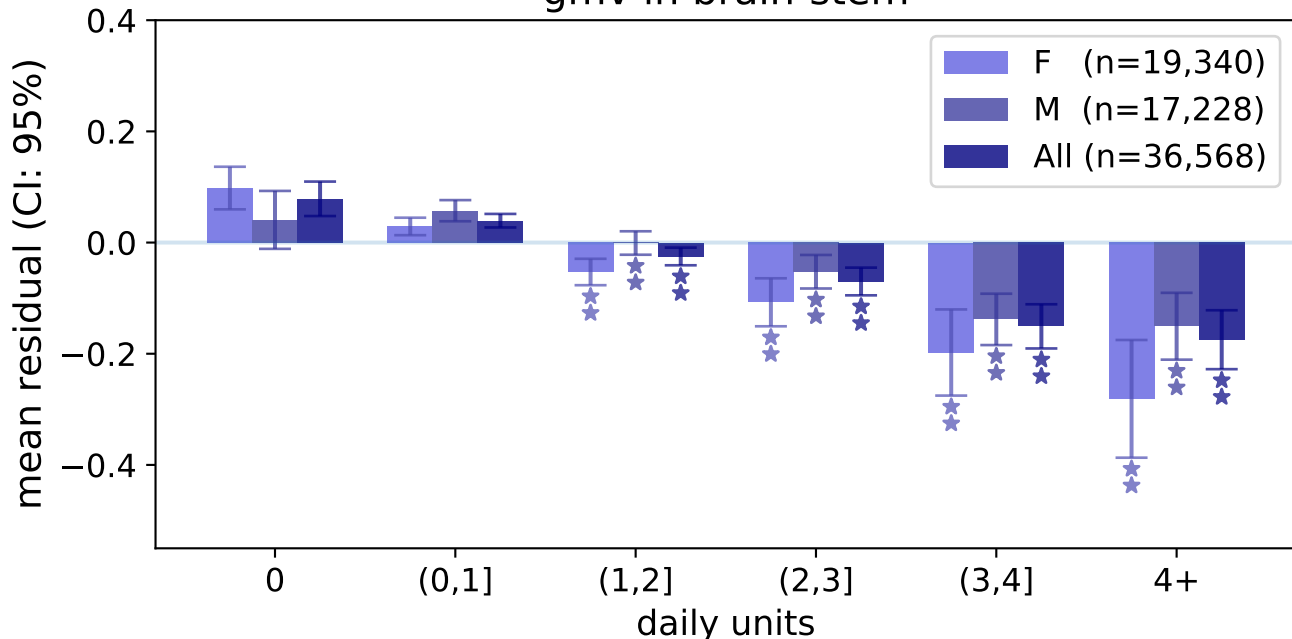

two-tailed test against [0,1] group: \*  $p < 0.01$ , \* \*  $p < 0.001$

# gmv in i-iv cerebellum (I)

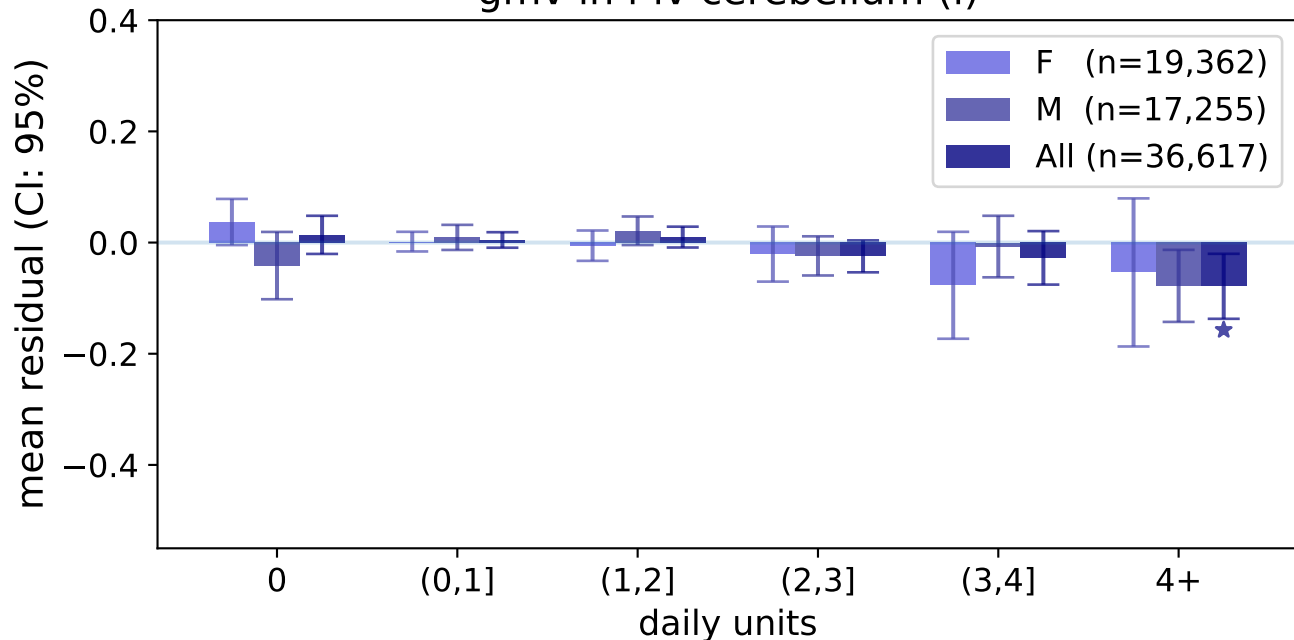

two-tailed test against [0,1] group: \* $p < 0.01$ , \* \*  $p < 0.001$

# gmv in i-iv cerebellum (r)

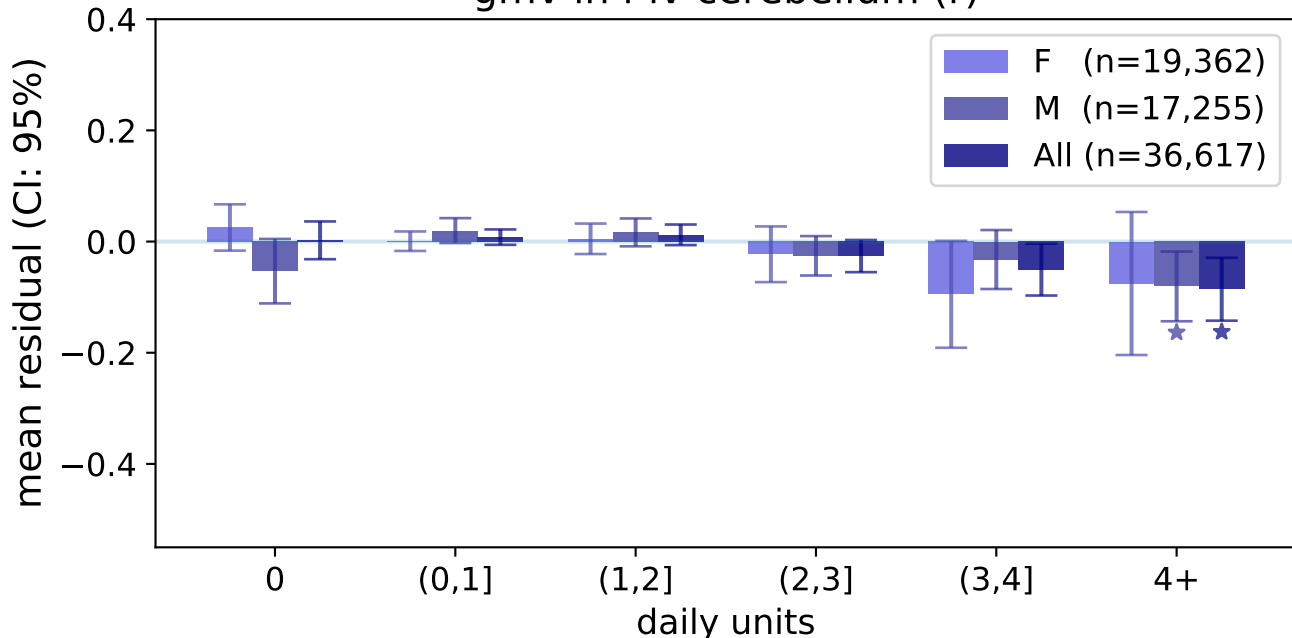

two-tailed test against [0,1] group: \* $p < 0.01$ , \* \*  $p < 0.001$

# gmv in v cerebellum (I)

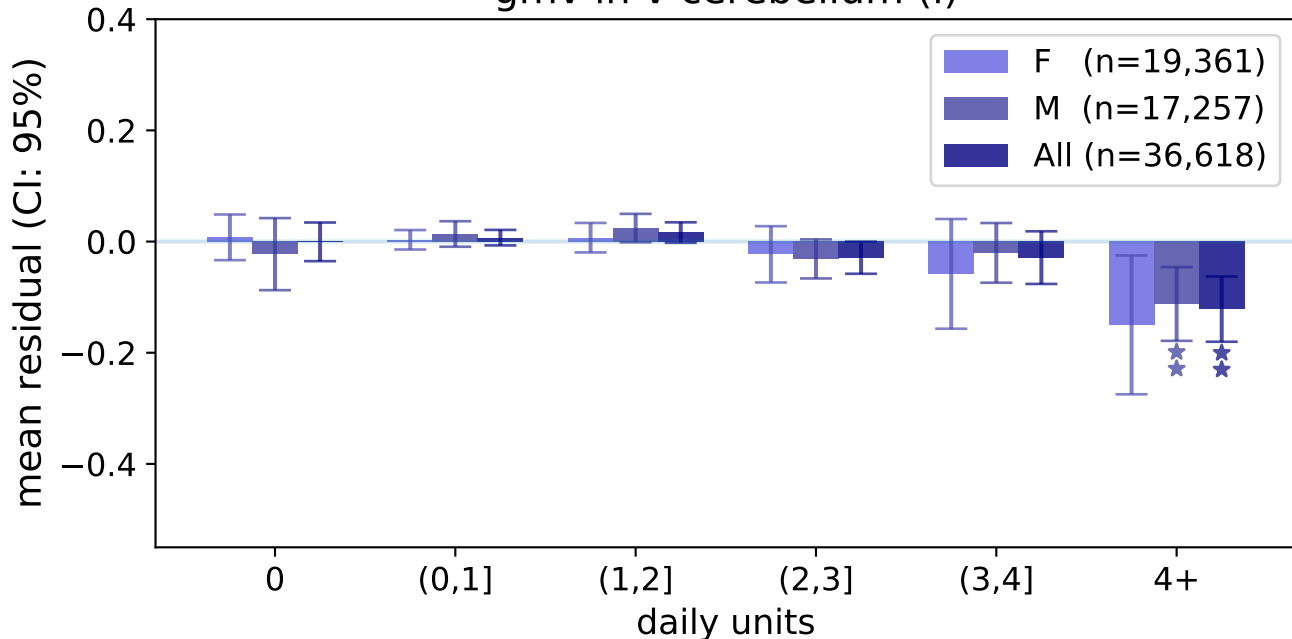

two-tailed test against [0,1] group: \* $p < 0.01$ , \* \*  $p < 0.001$

# gmv in v cerebellum (r)

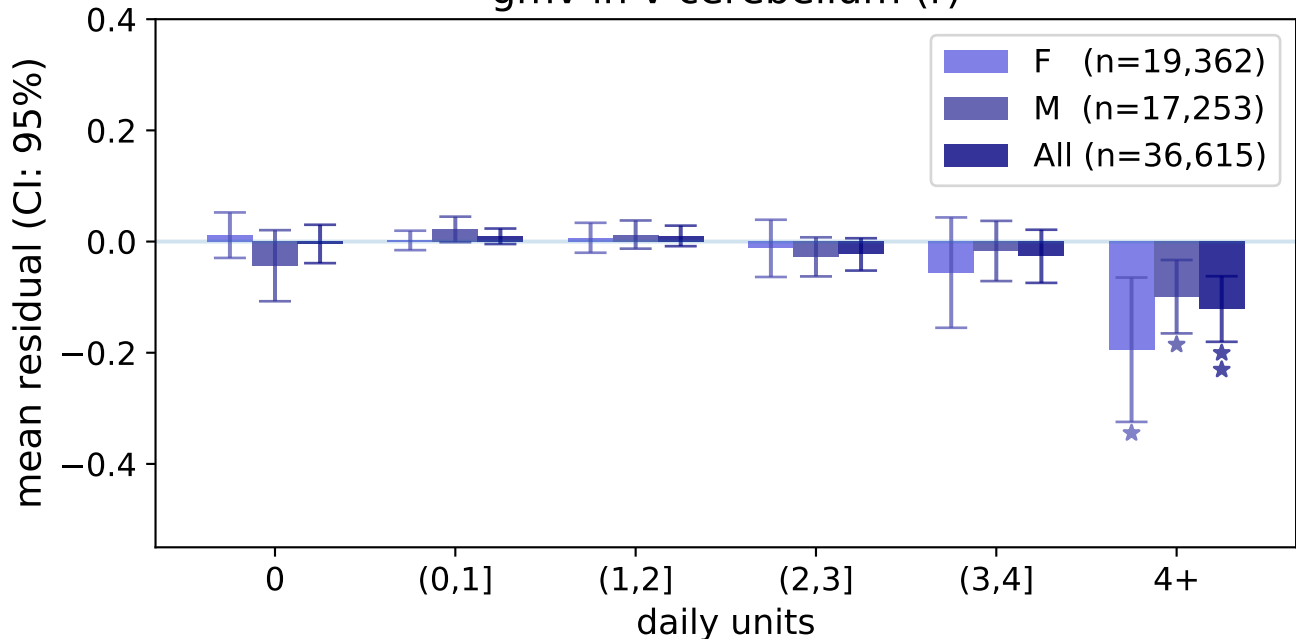

two-tailed test against [0,1] group: \* $p < 0.01$ , \* \*  $p < 0.001$

# gmv in vi cerebellum (I)

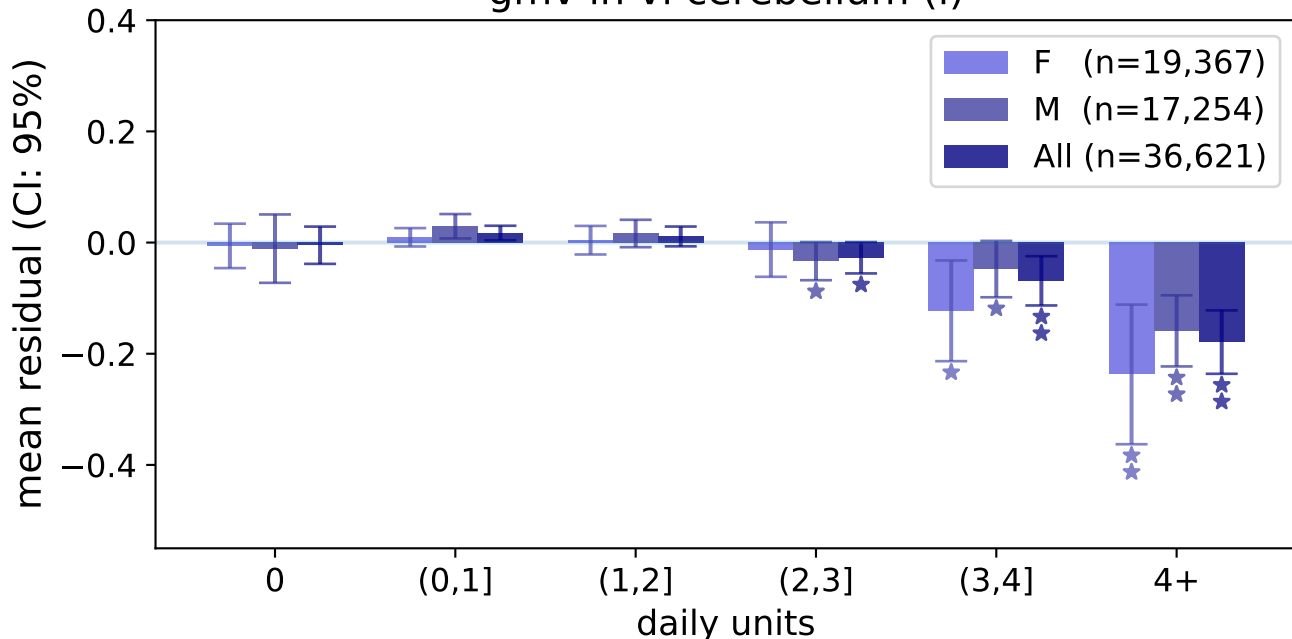

# gmv in vermis vi cerebellum

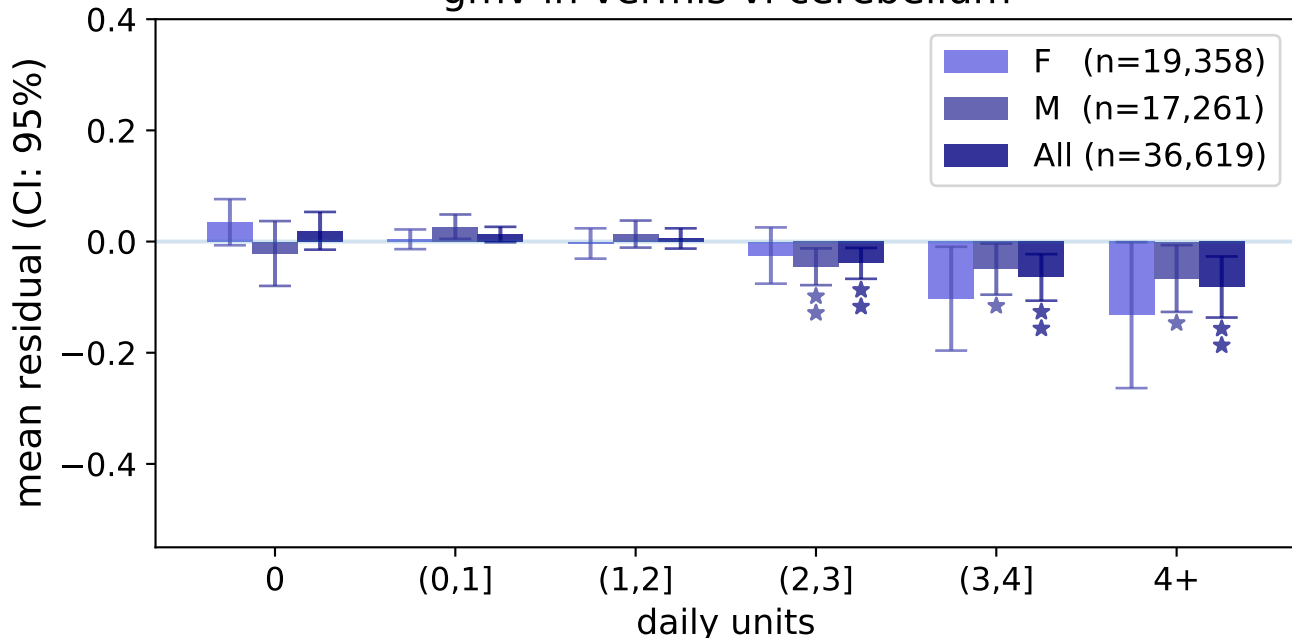

two-tailed test against [0,1] group: \*  $p < 0.01$ , \* \*  $p < 0.001$

# gmv in vi cerebellum (r)

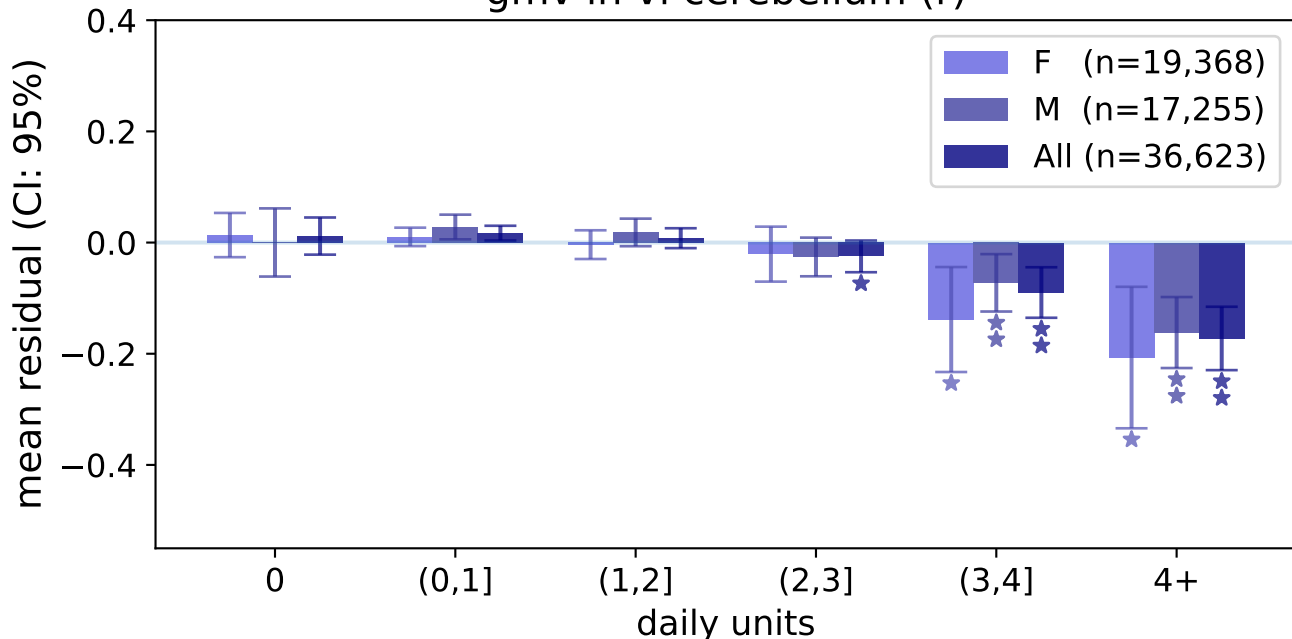

two-tailed test against [0,1] group: \* $p < 0.01$ , \* \*  $p < 0.001$

# gmv in crus i cerebellum (I)

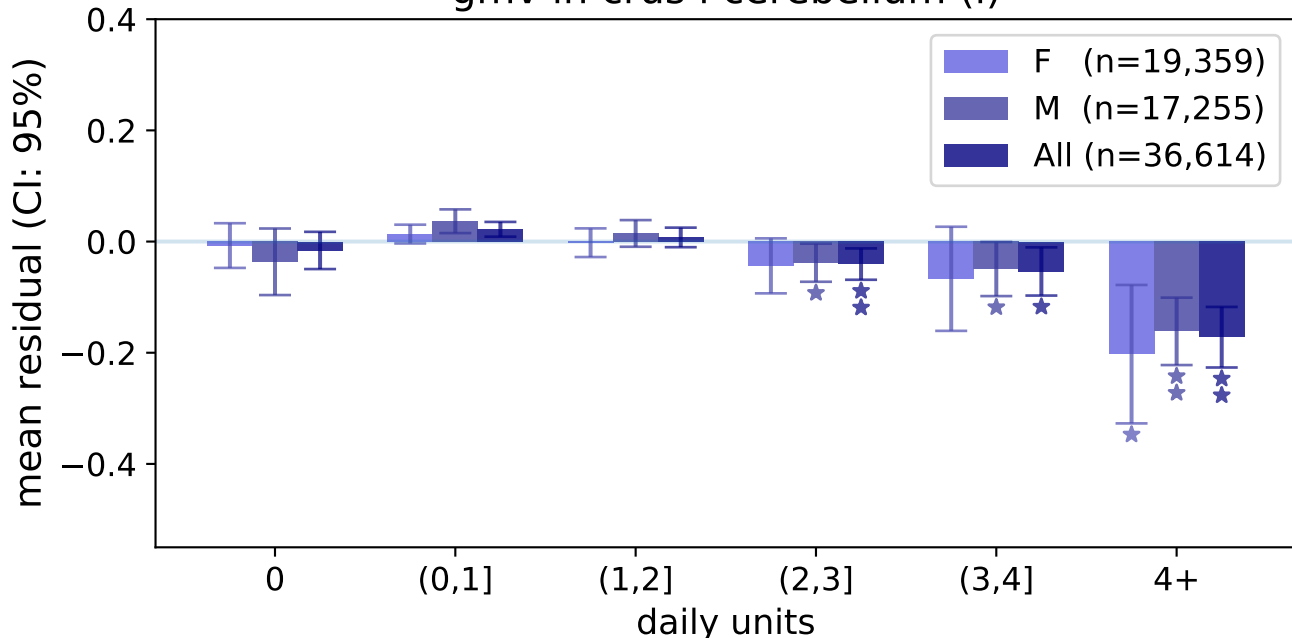

two-tailed test against [0,1] group: \*  $p < 0.01$ , \* \*  $p < 0.001$

# gmv in vermis crus i cerebellum

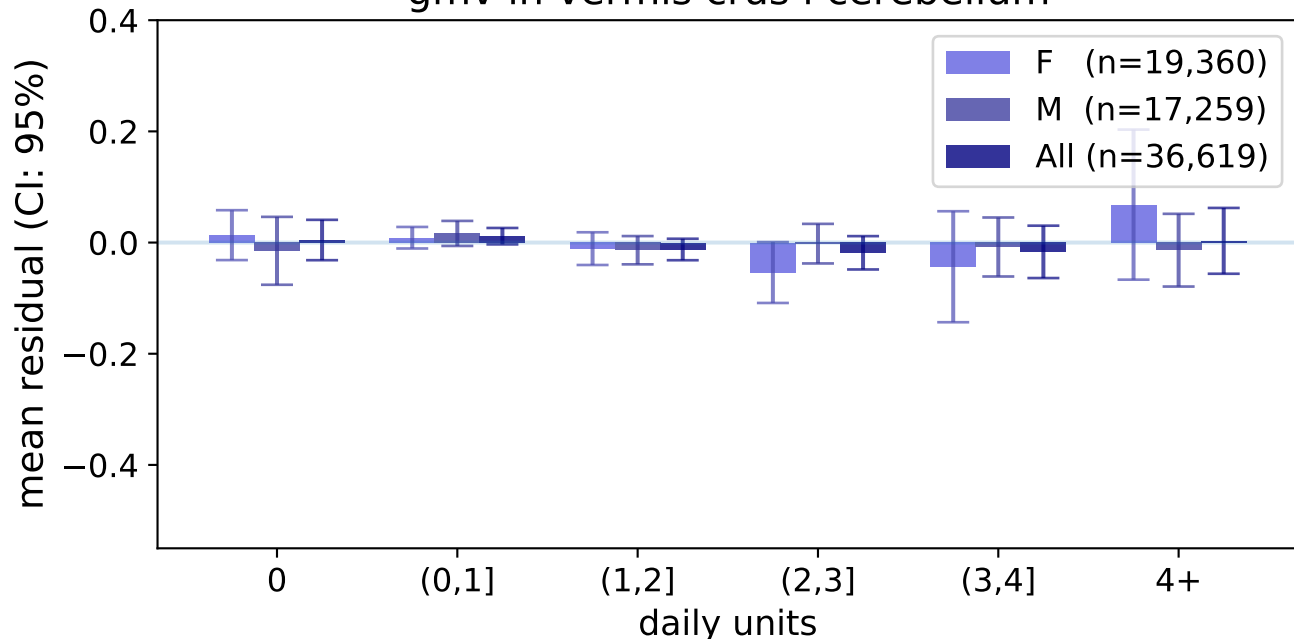

two-tailed test against [0,1] group: \* $p < 0.01$ , \*\* $p < 0.001$

# gmv in crus i cerebellum (r)

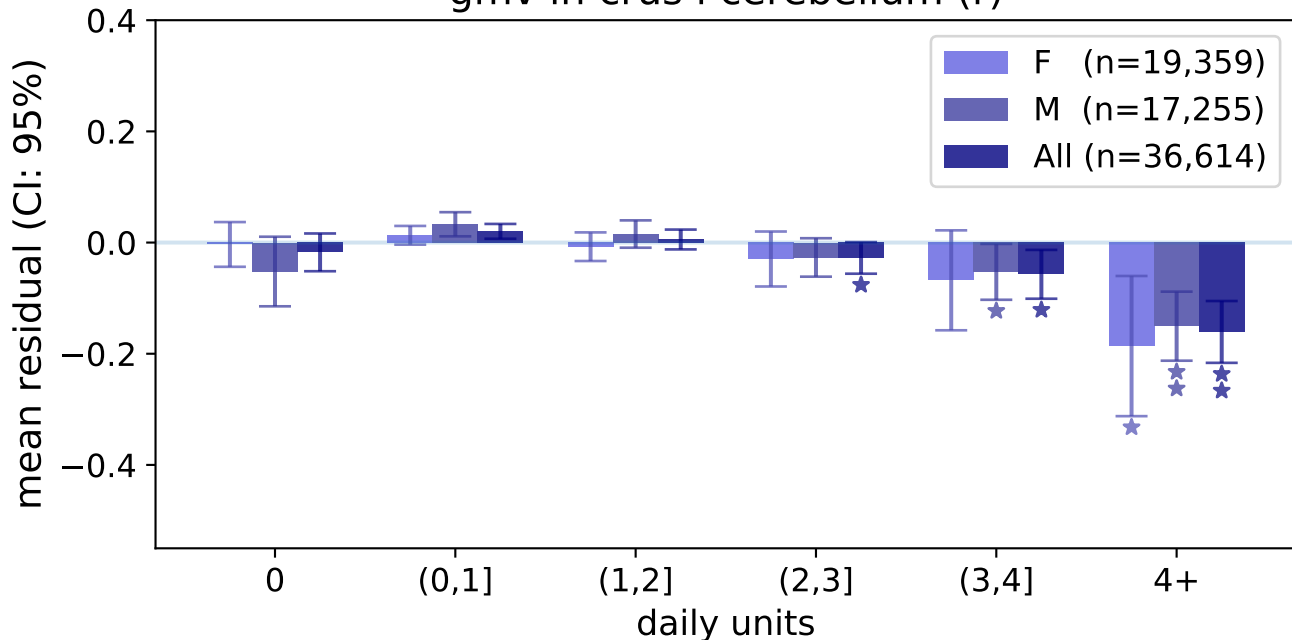

# gmv in crus ii cerebellum (I)

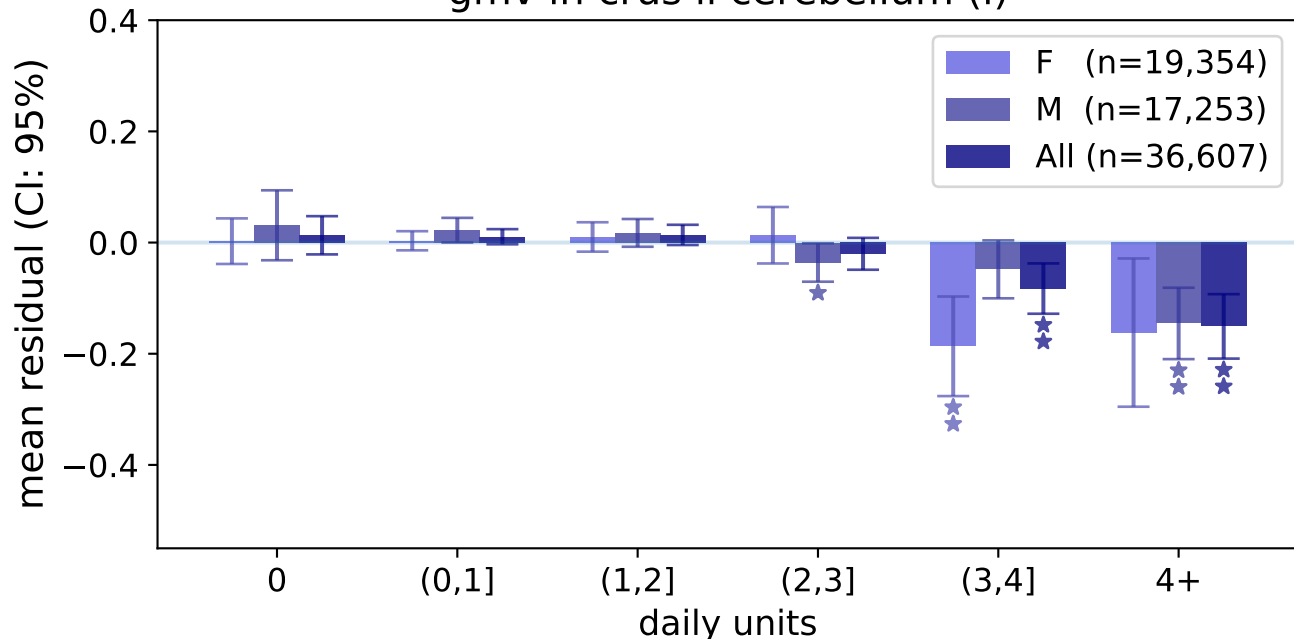

two-tailed test against [0,1] group: \*  $p < 0.01$ , \*\*  $p < 0.001$

# gmv in vermis crus ii cerebellum

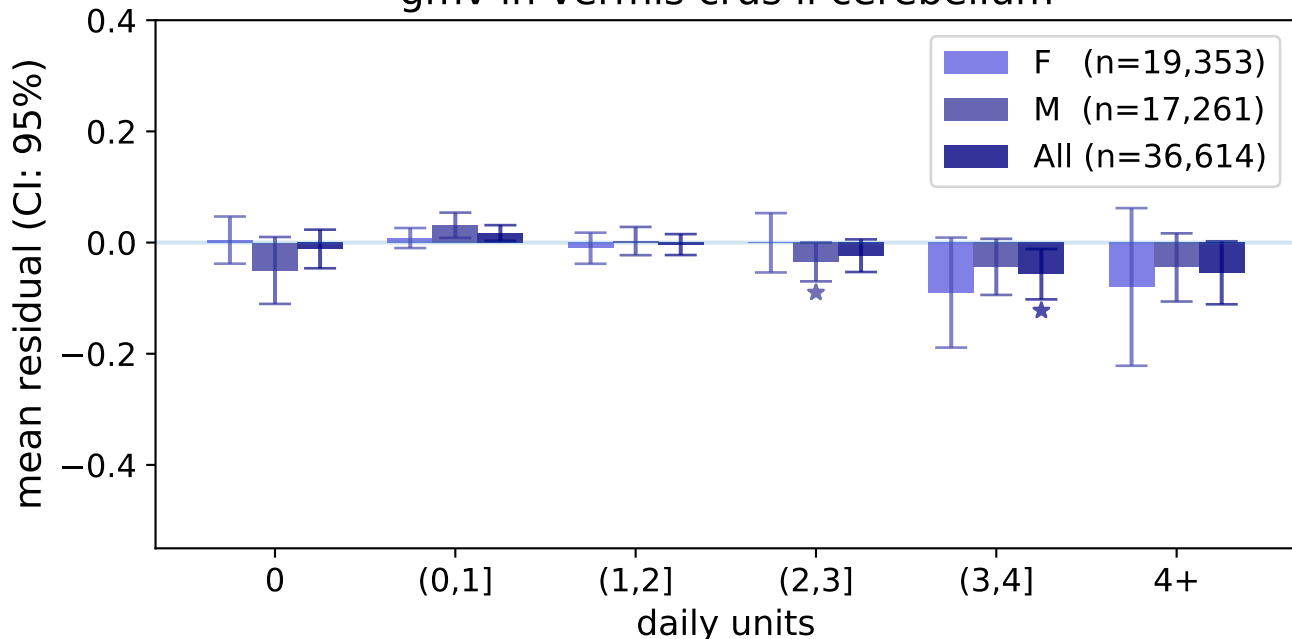

# gmv in crus ii cerebellum (r)

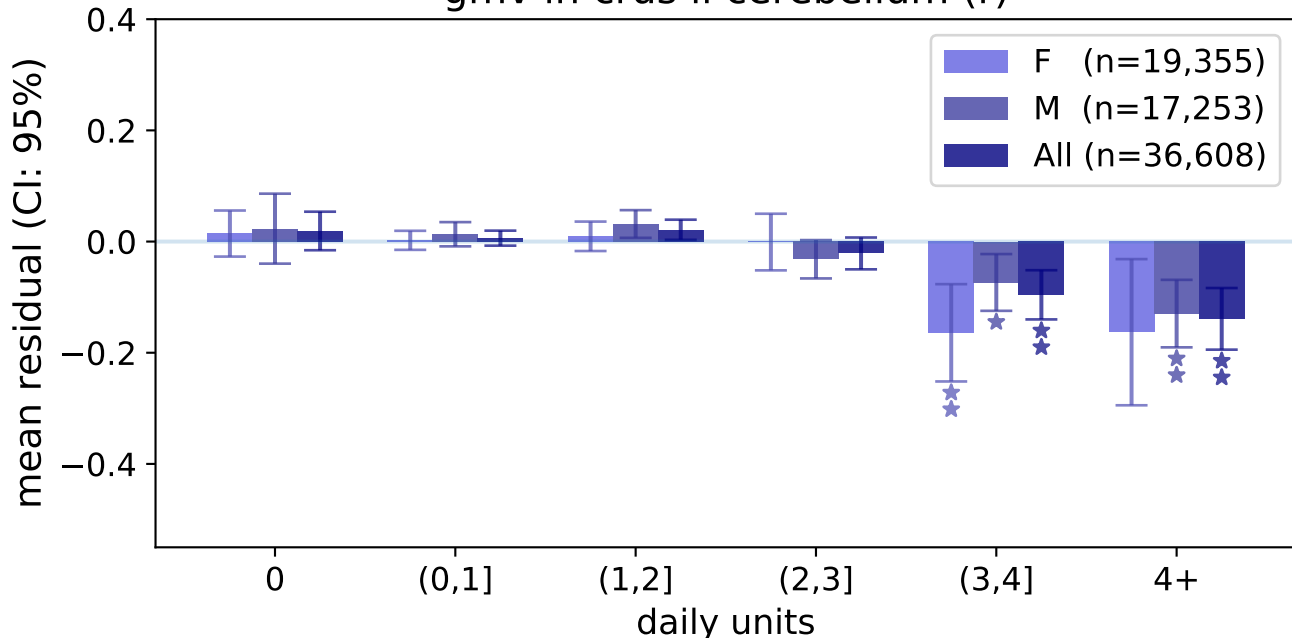

two-tailed test against [0,1] group: \*  $p < 0.01$ , \* \*  $p < 0.001$

# gmv in viib cerebellum (I)

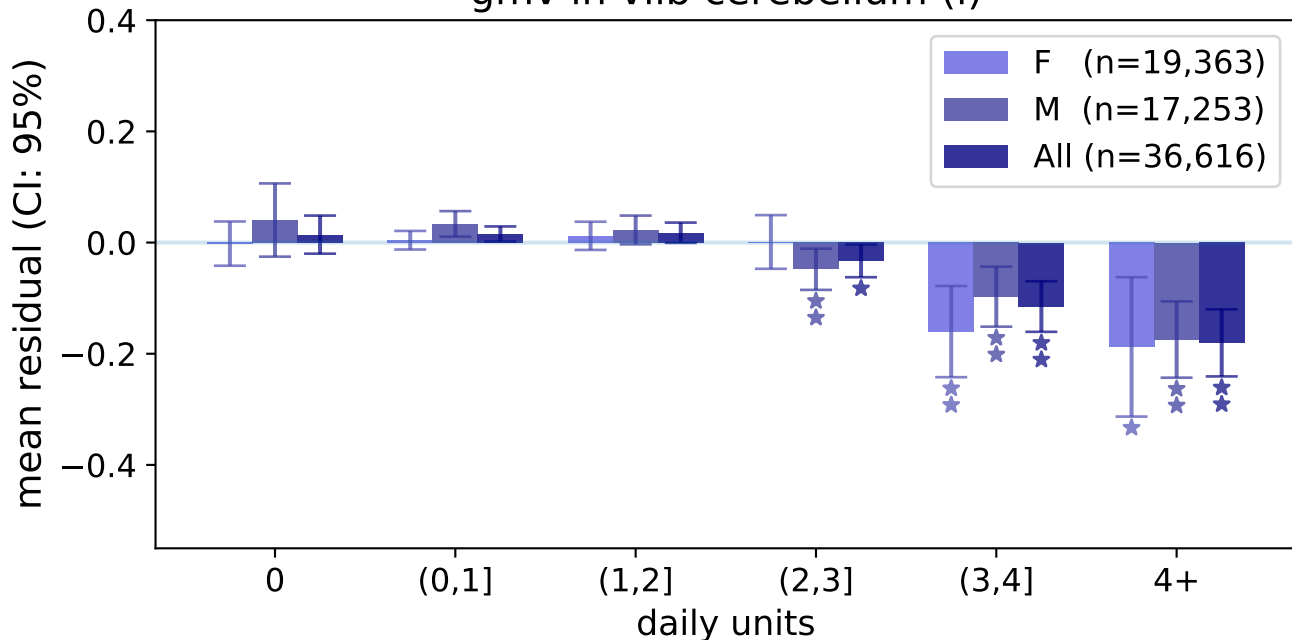

two-tailed test against [0,1] group: \*  $p < 0.01$ , \* \*  $p < 0.001$

# gmv in vermis viib cerebellum

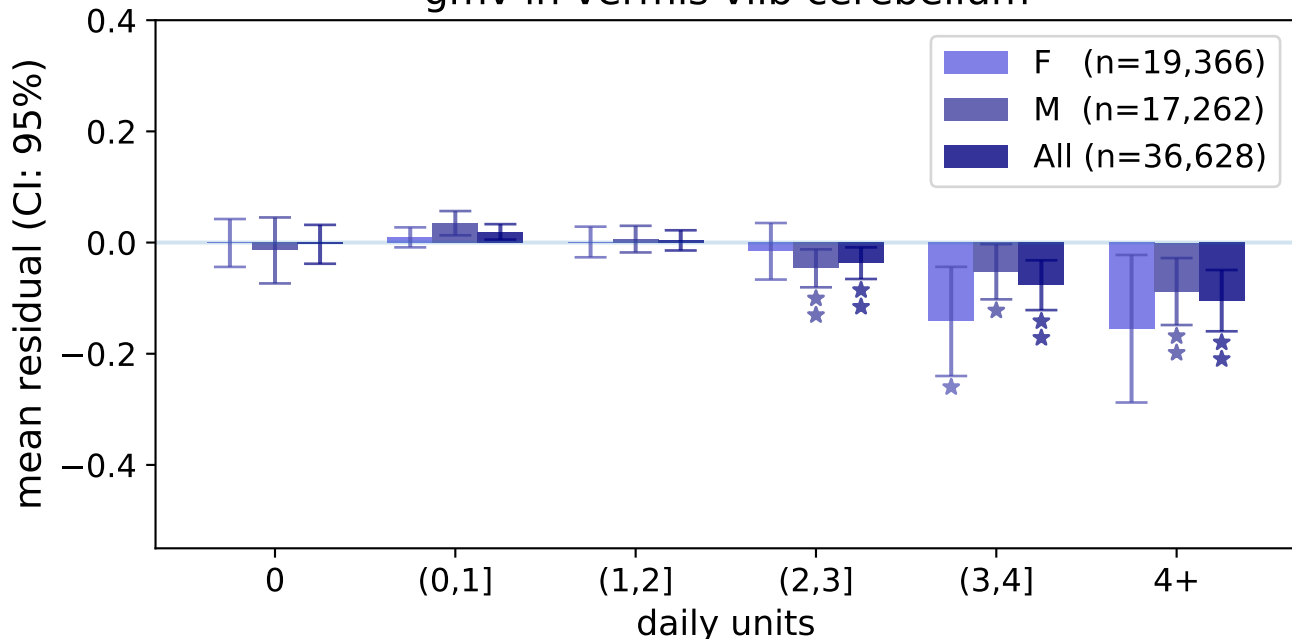

two-tailed test against [0,1] group: \*  $p < 0.01$ , \* \*  $p < 0.001$

# gmv in viib cerebellum (r)

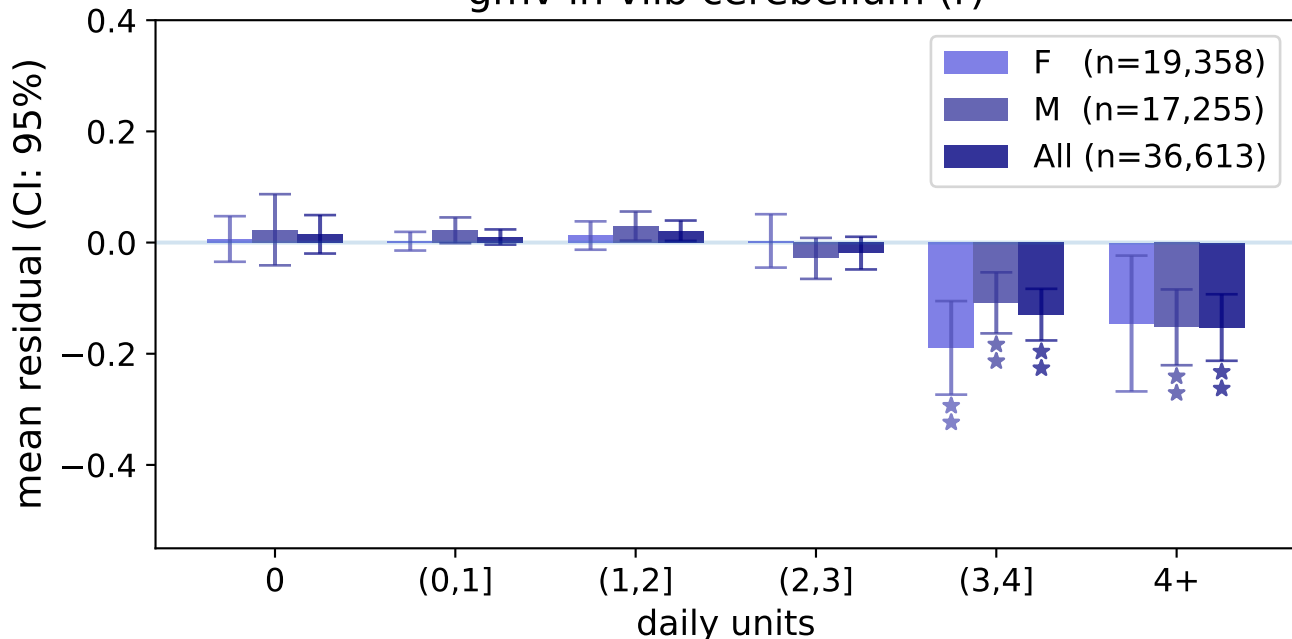

two-tailed test against [0,1] group: \*  $p < 0.01$ , \* \*  $p < 0.001$

# gmv in viiia cerebellum (I)

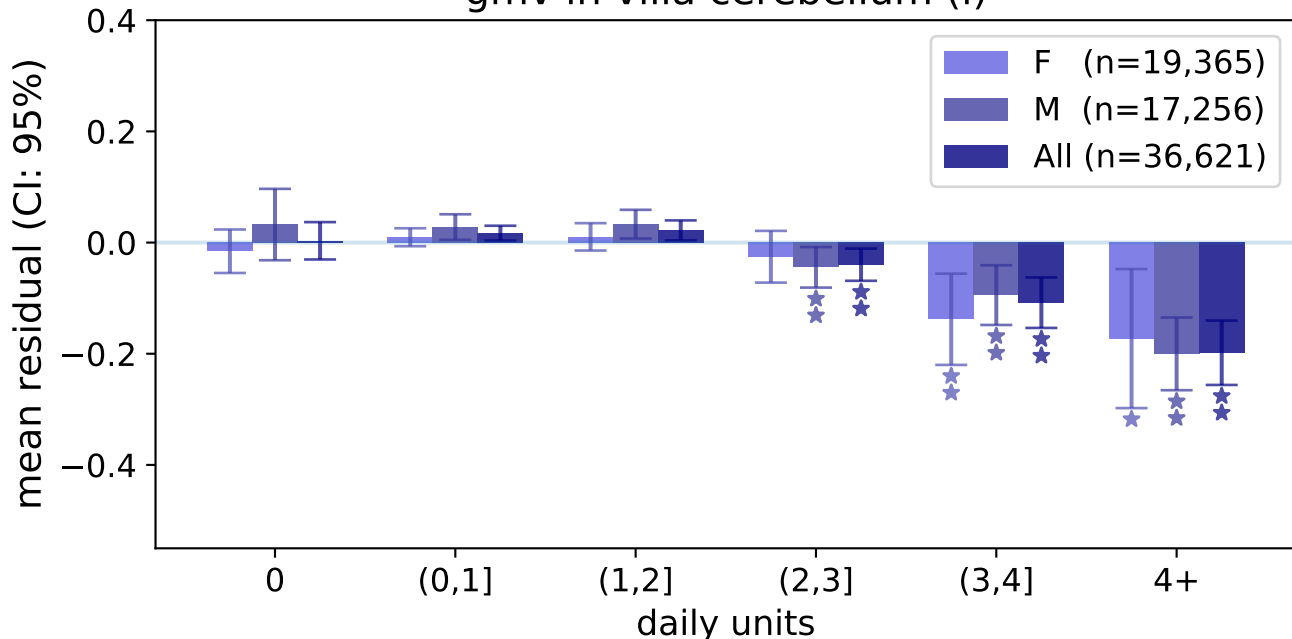

two-tailed test against [0,1] group: \*  $p < 0.01$ , \* \*  $p < 0.001$

# gmv in vermis viiaa cerebellum

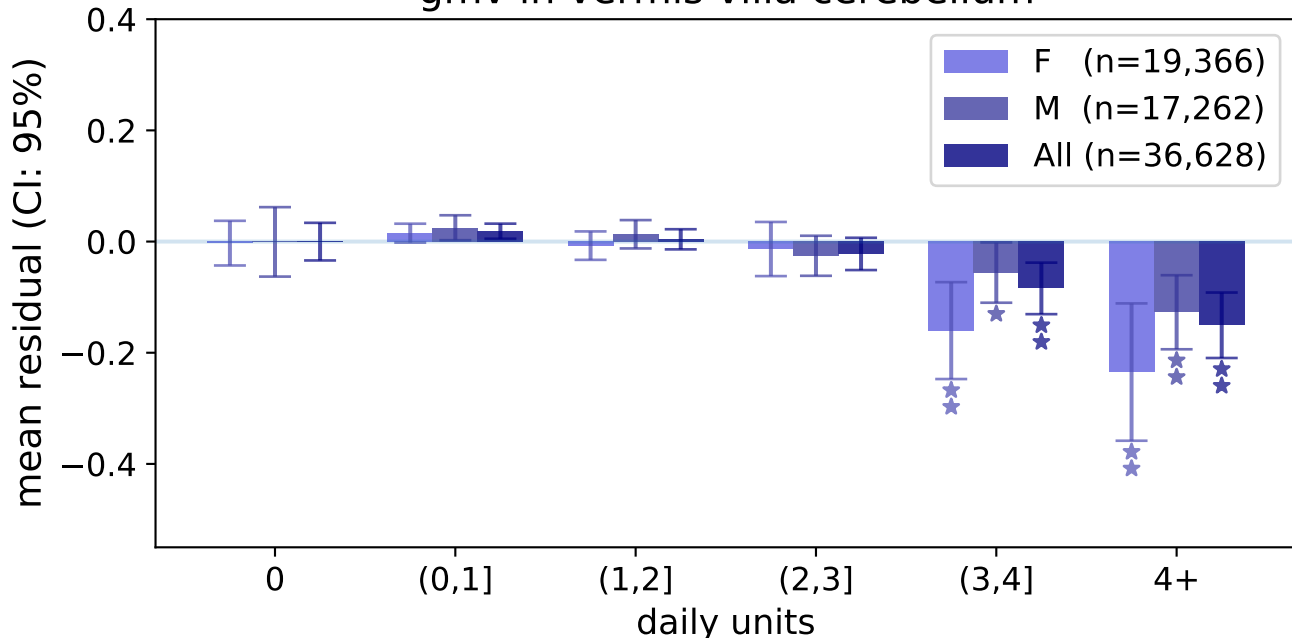

two-tailed test against [0,1] group: \*  $p < 0.01$ , \* \*  $p < 0.001$

# gmv in viiia cerebellum (r)

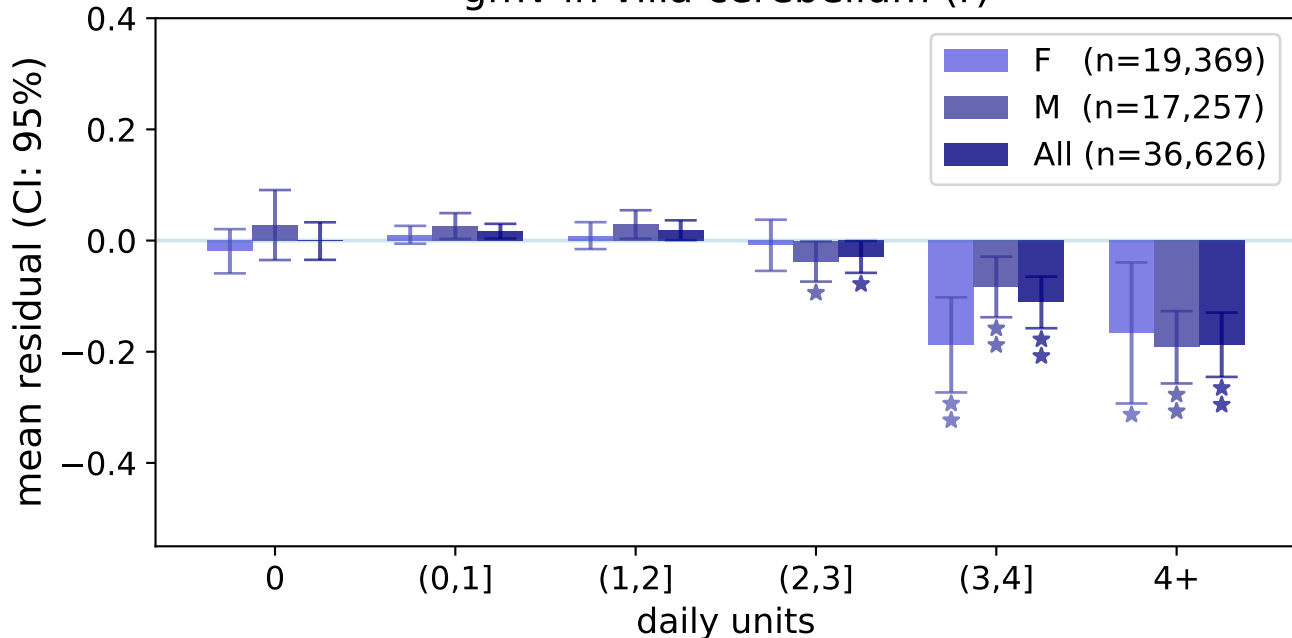

two-tailed test against [0,1] group: \*  $p < 0.01$ , \* \*  $p < 0.001$

# gmv in viiib cerebellum (I)

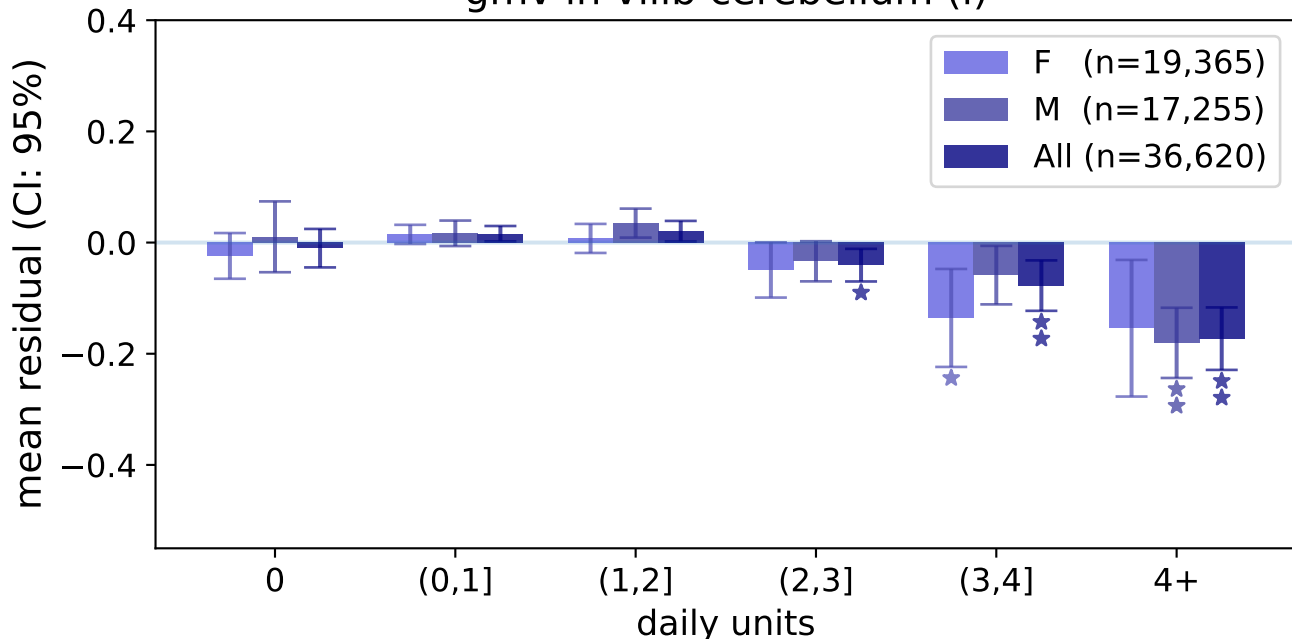

two-tailed test against [0,1] group: \*  $p < 0.01$ , \* \*  $p < 0.001$

# gmv in vermis viiib cerebellum

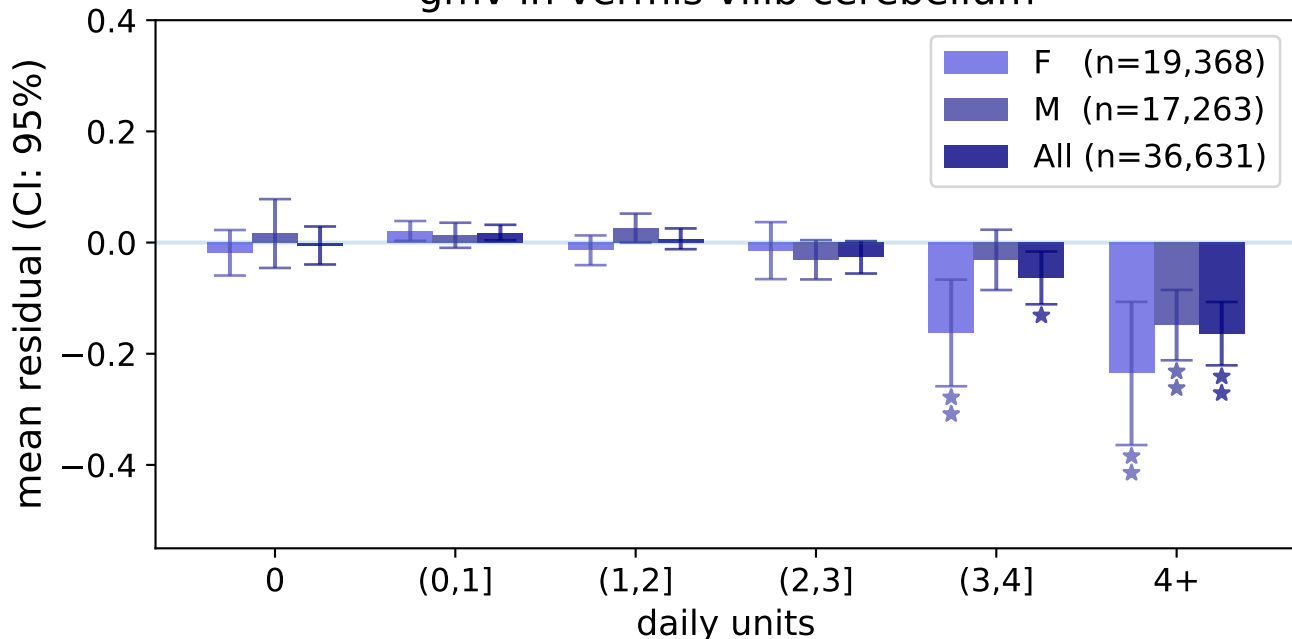

# gmv in viiib cerebellum (r)

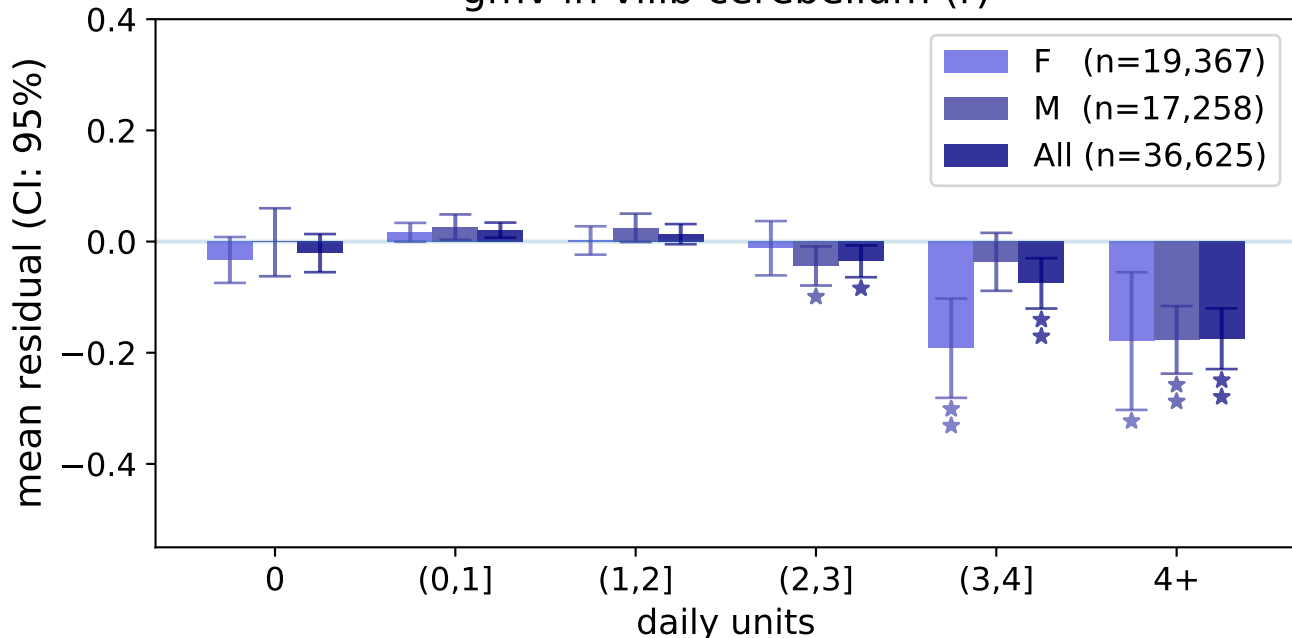

# gmv in ix cerebellum (I)

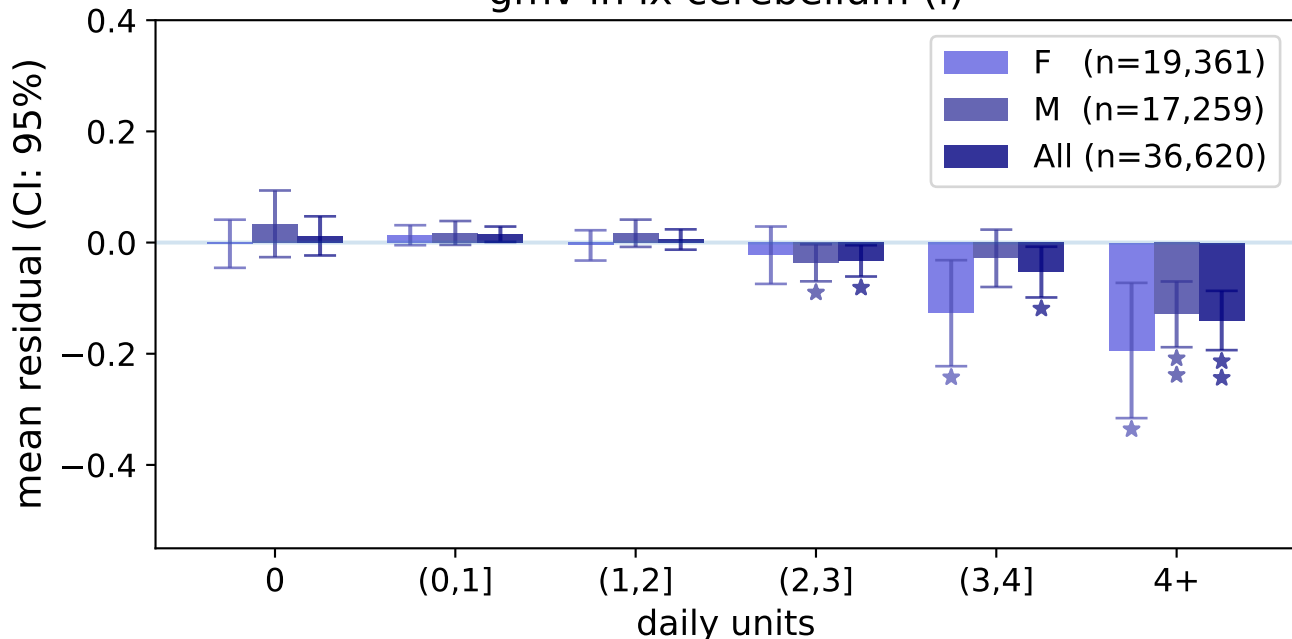

two-tailed test against [0,1] group: \* $p < 0.01$ , \* \*  $p < 0.001$

# gmv in vermis ix cerebellum

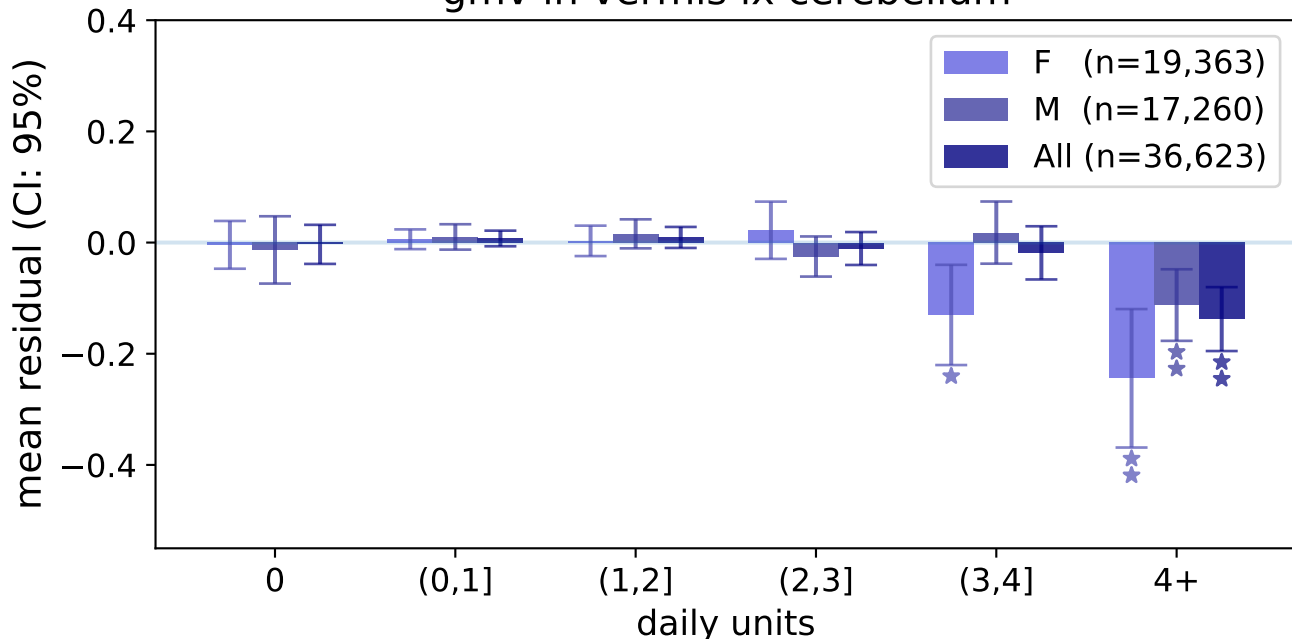

# gmv in ix cerebellum (r)

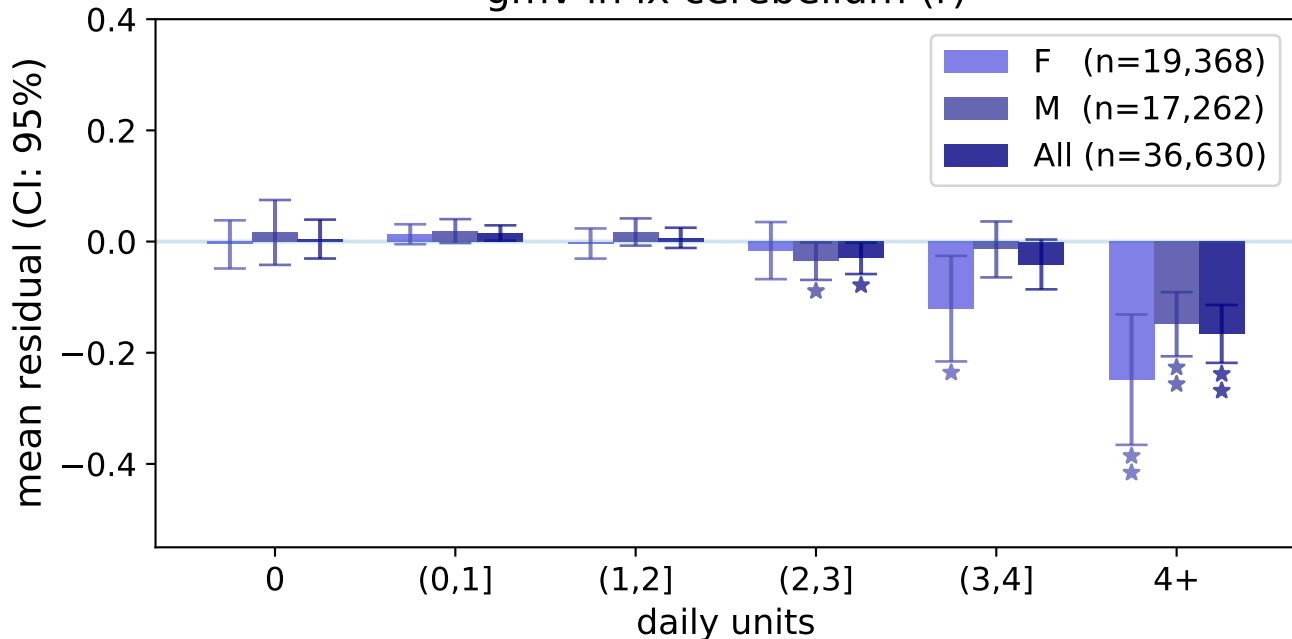

two-tailed test against [0,1] group: \*  $p < 0.01$ , \* \*  $p < 0.001$

# gmv in x cerebellum (I)

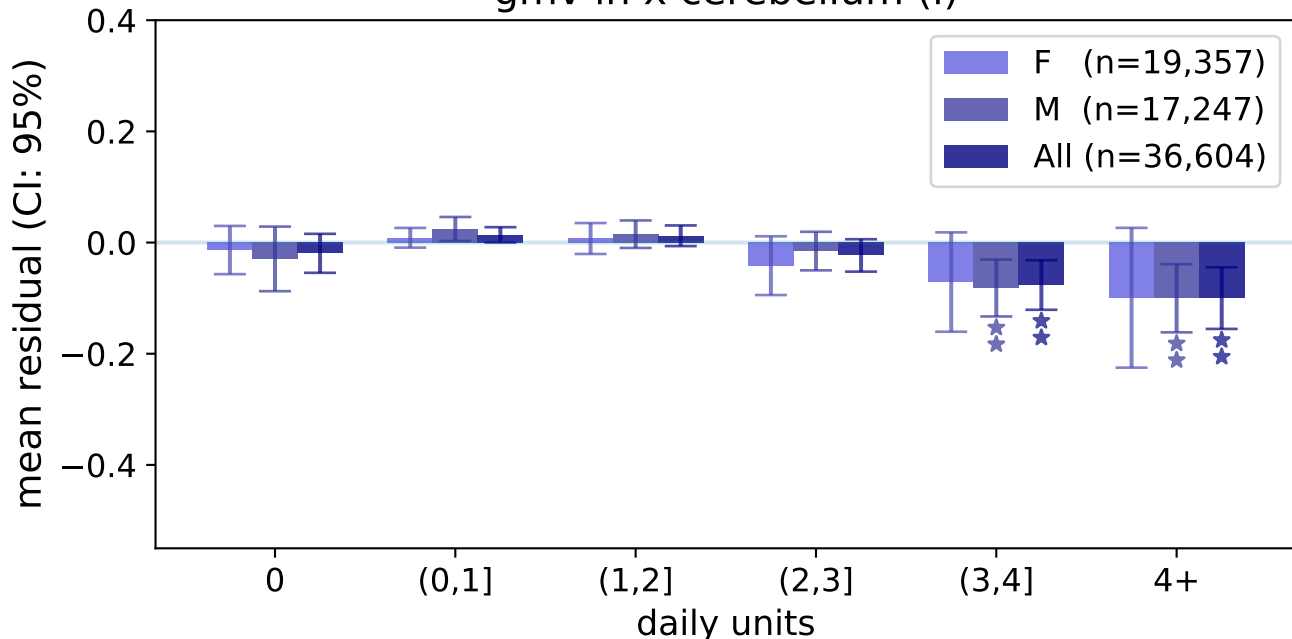

# gmv in vermis x cerebellum

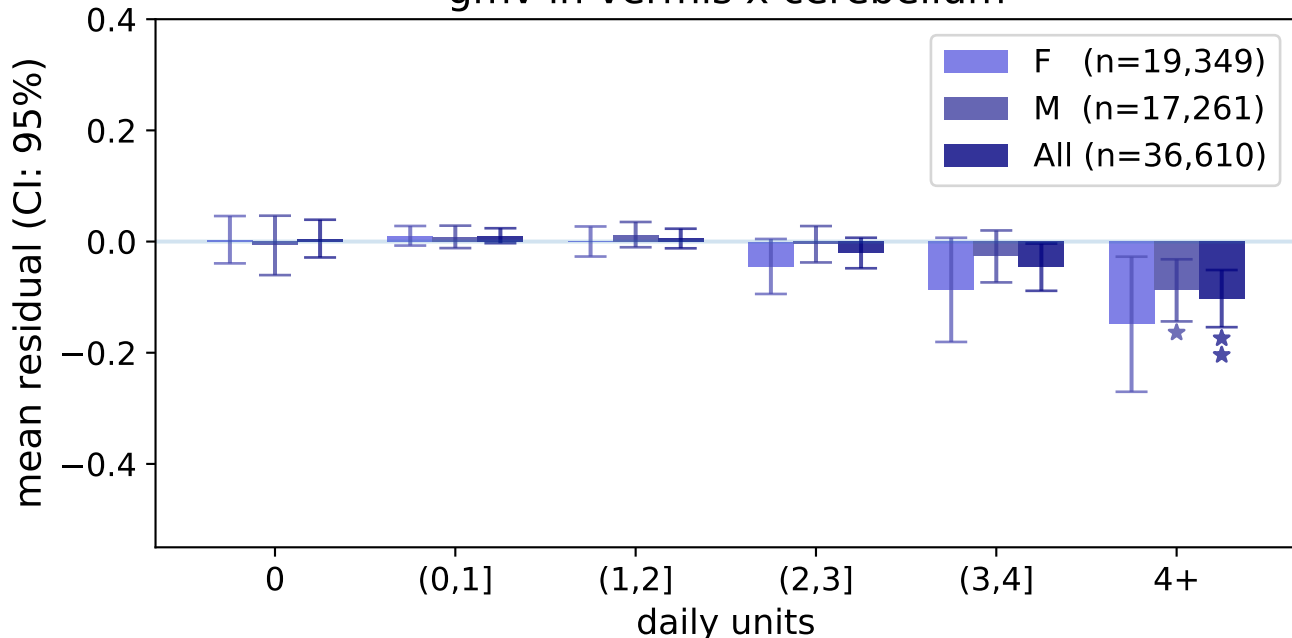

# gmv in x cerebellum (r)

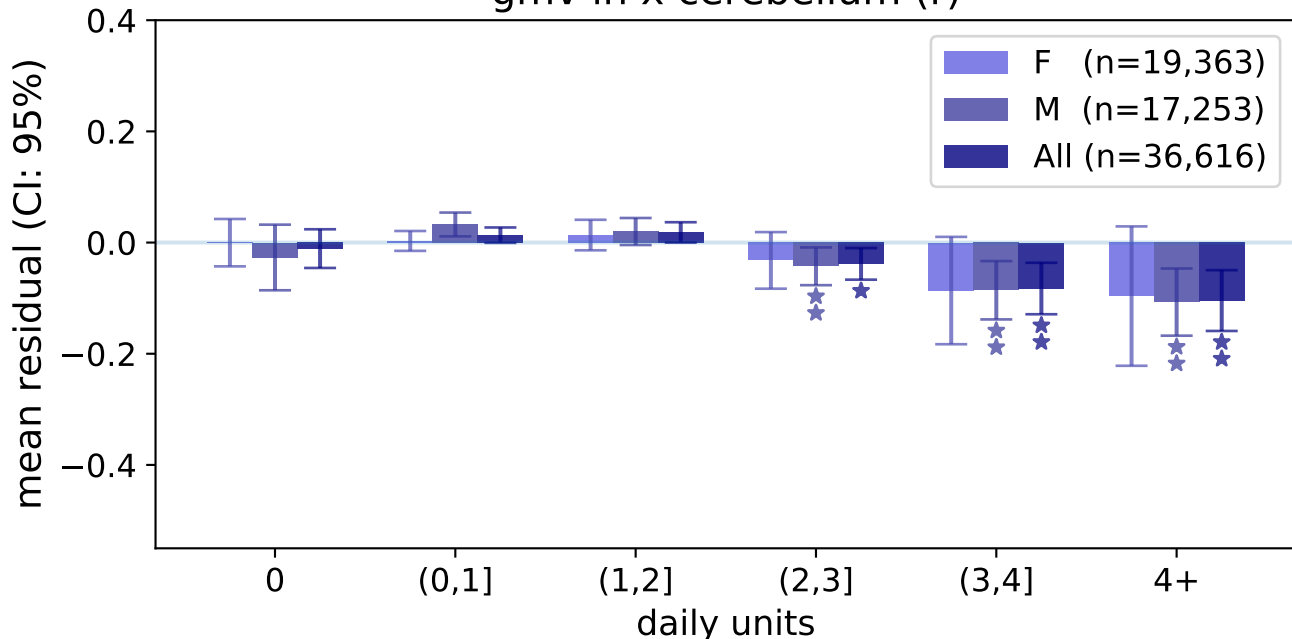

**Supplementary Figure 4.** Associations between daily alcohol units and white matter microstructure indices of interest across white matter tract regions. Asterisks denote statistically significant effects in F-test, corrected for multiple hypothesis testing (Holm method),  $p < 1.64 \times 10^{-4}$ . Colors represent the expected change in each imaging derived phenotype resulting from the increase in daily consumption from 2 to 3 units, based on the regression model. FA = fractional anisotropy, ICVF = intracellular volume fraction, ISOVF = isotropic volume fraction, MD = mean diffusivity, OD = orientation dispersion, r = right, l = left

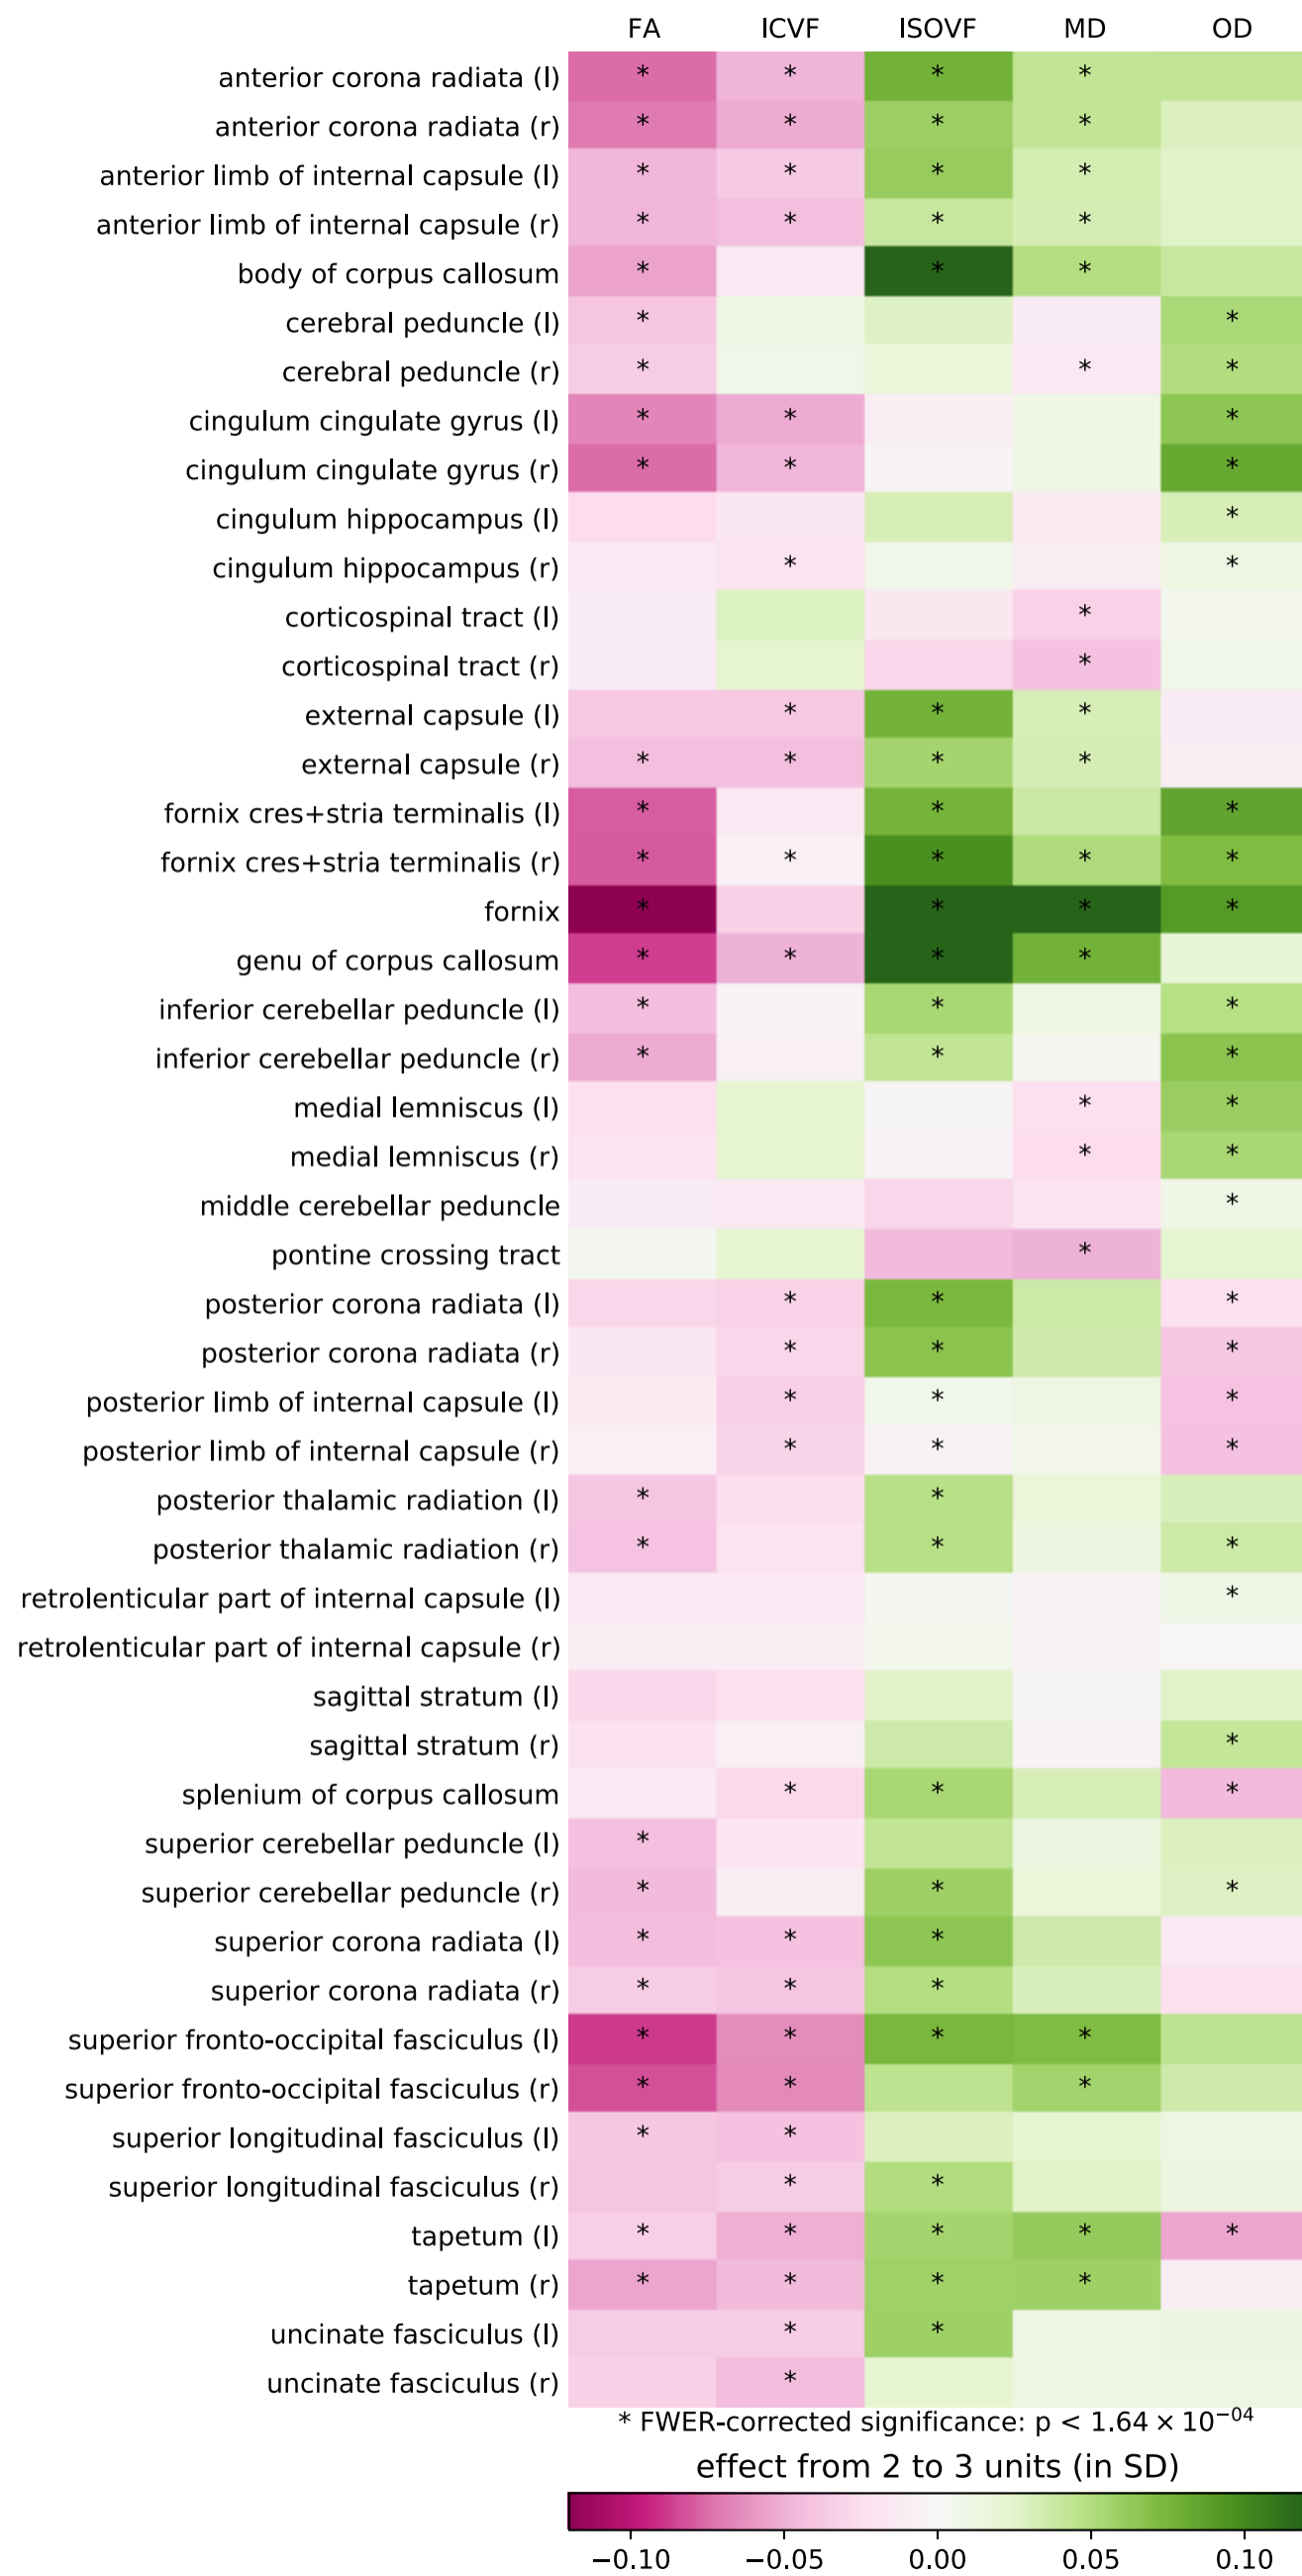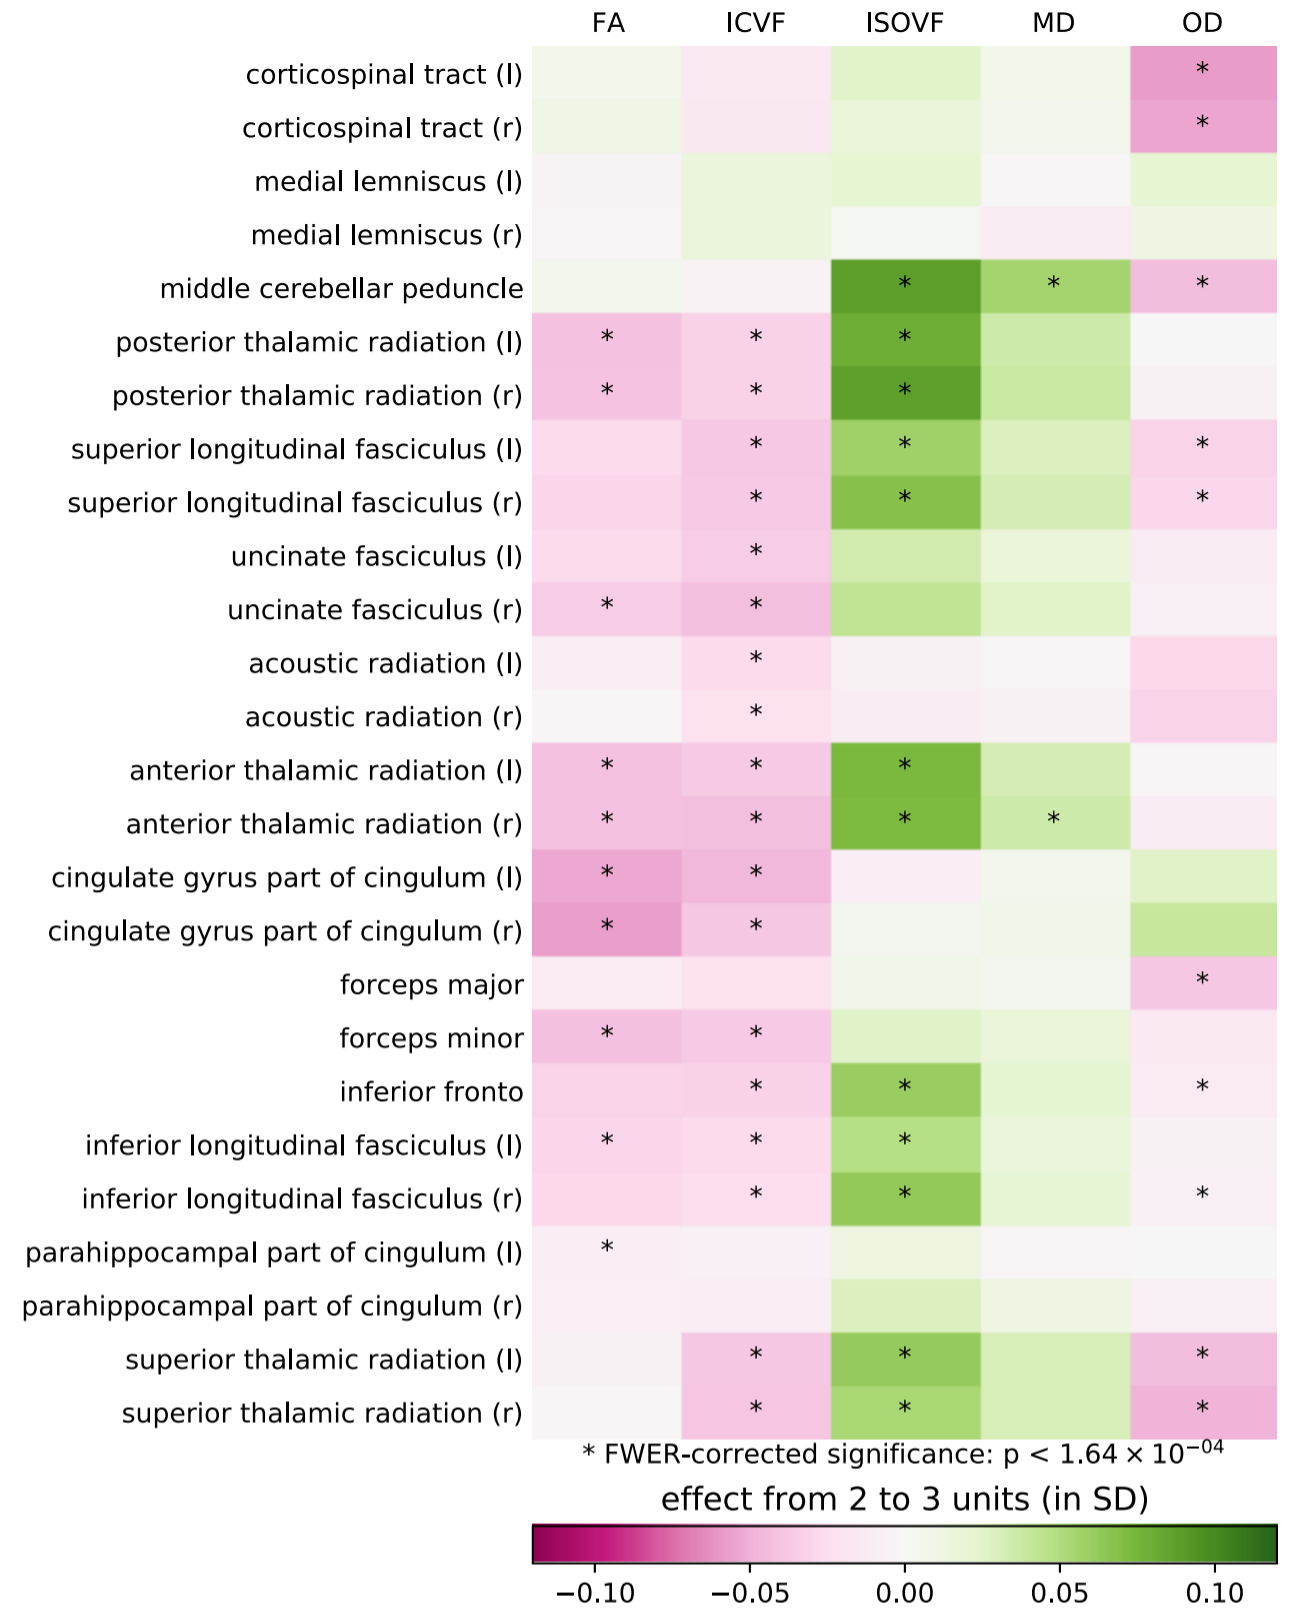

Supplement: 41467_2022_28735_MOESM1_ESM.pdf [file 41467_2022_28735_MOESM1_ESM.pdf]
